# Supplementary material for: Single-cell and spatial multi-omics highlight effects of anti-integrin therapy across cellular compartments in ulcerative colitis
Source: PubMed Central journal article supplement (PMC10876948; doi:10.1038/s41467-024-45665-6), 2024-02-19
Supplement: 41467_2024_45665_MOESM1_ESM.pdf [file 41467_2024_45665_MOESM1_ESM.pdf]

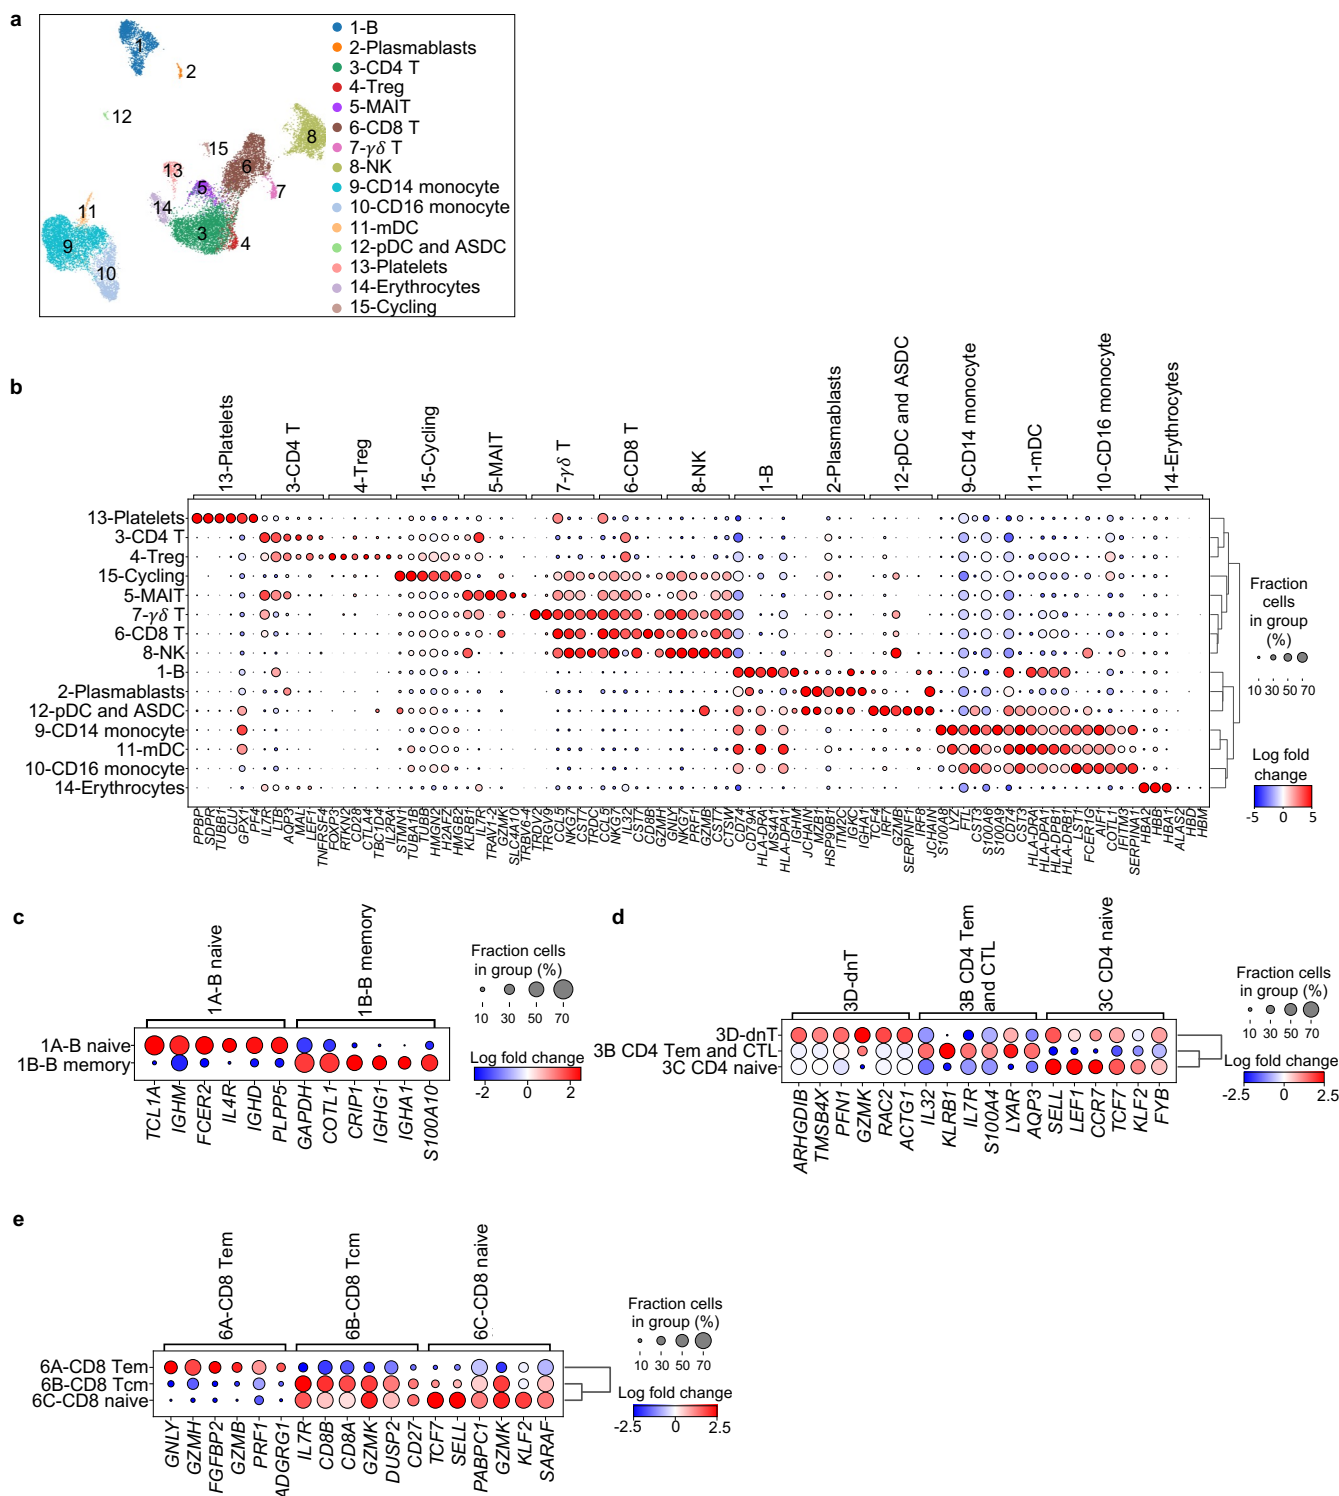

**Supplementary Fig.1| Peripheral blood leukocyte (PBL) scRNA-seq coarse cell subset annotations and both coarse and fine cell subset landmark genes.** **a**, UMAP visualization of pooled multiplex PBL scRNA-seq for 20,130 cells from HC (n=4), UC (n=3), and UC-VDZ (n=4) patients highlighting coarse cell subset annotations. **b-e**, Dot plot representation of landmark genes expressed by (b) coarse cell subsets and (c-e) fine PBL cell subsets. Genes ranked by Wilcoxon rank-sum. Cell subsets without landmark genes above selected minimum log fold change are not displayed.

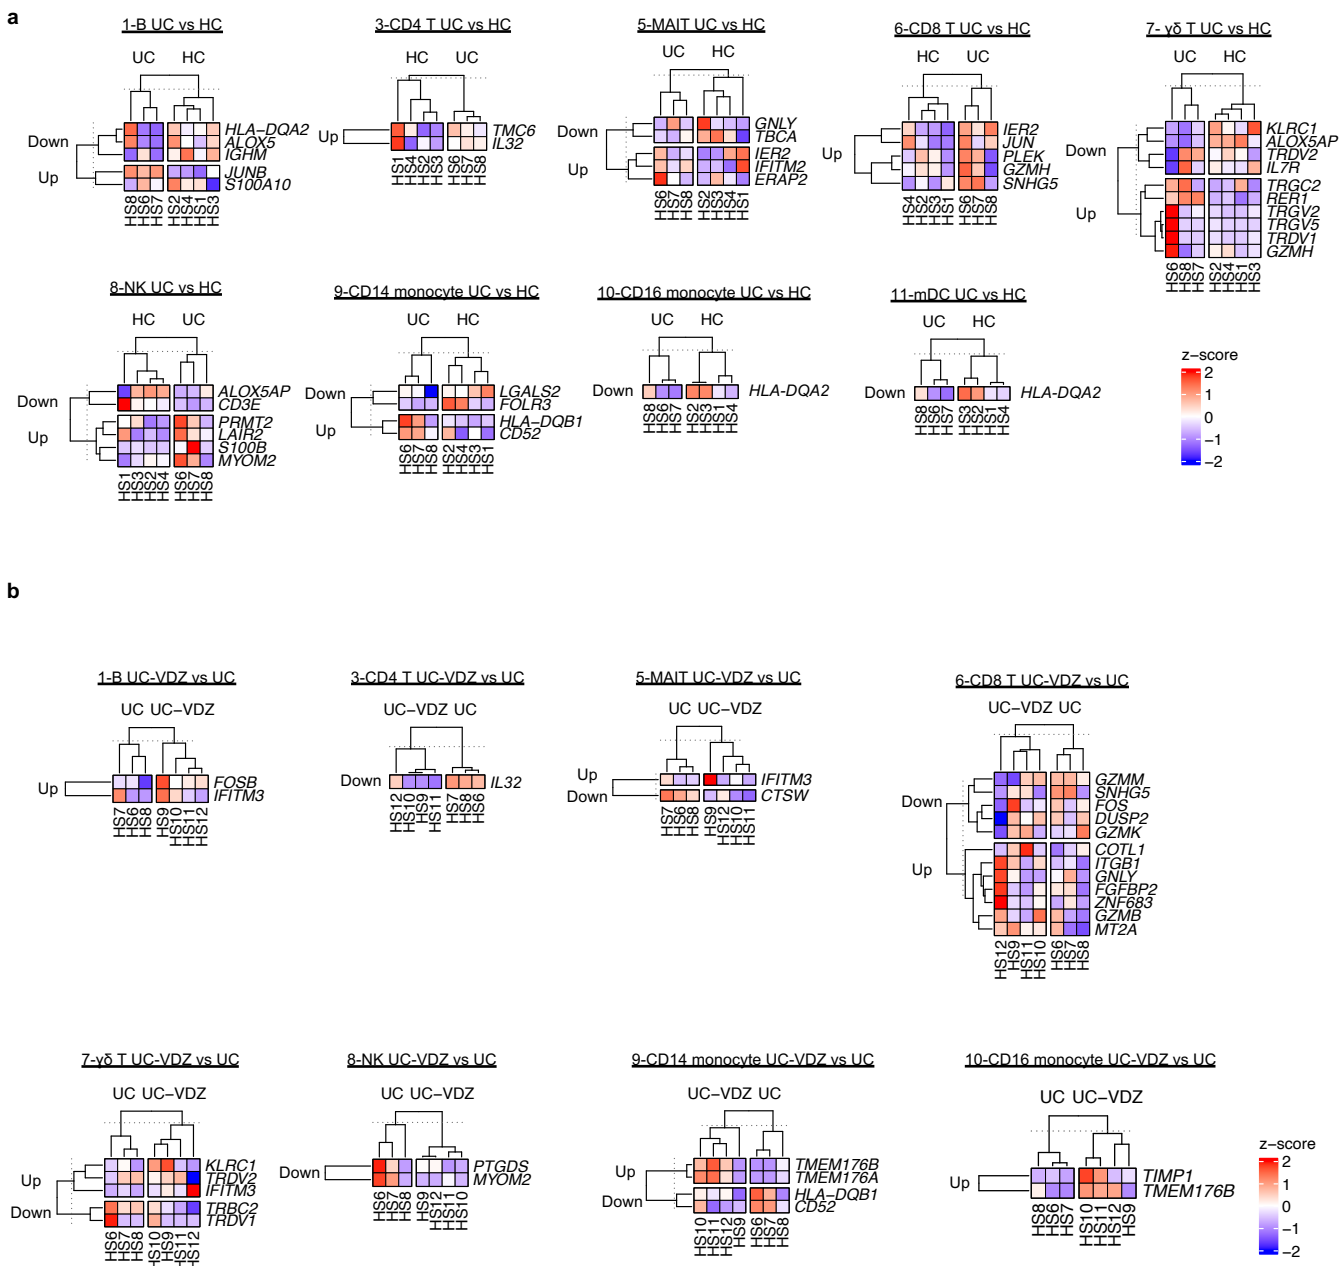



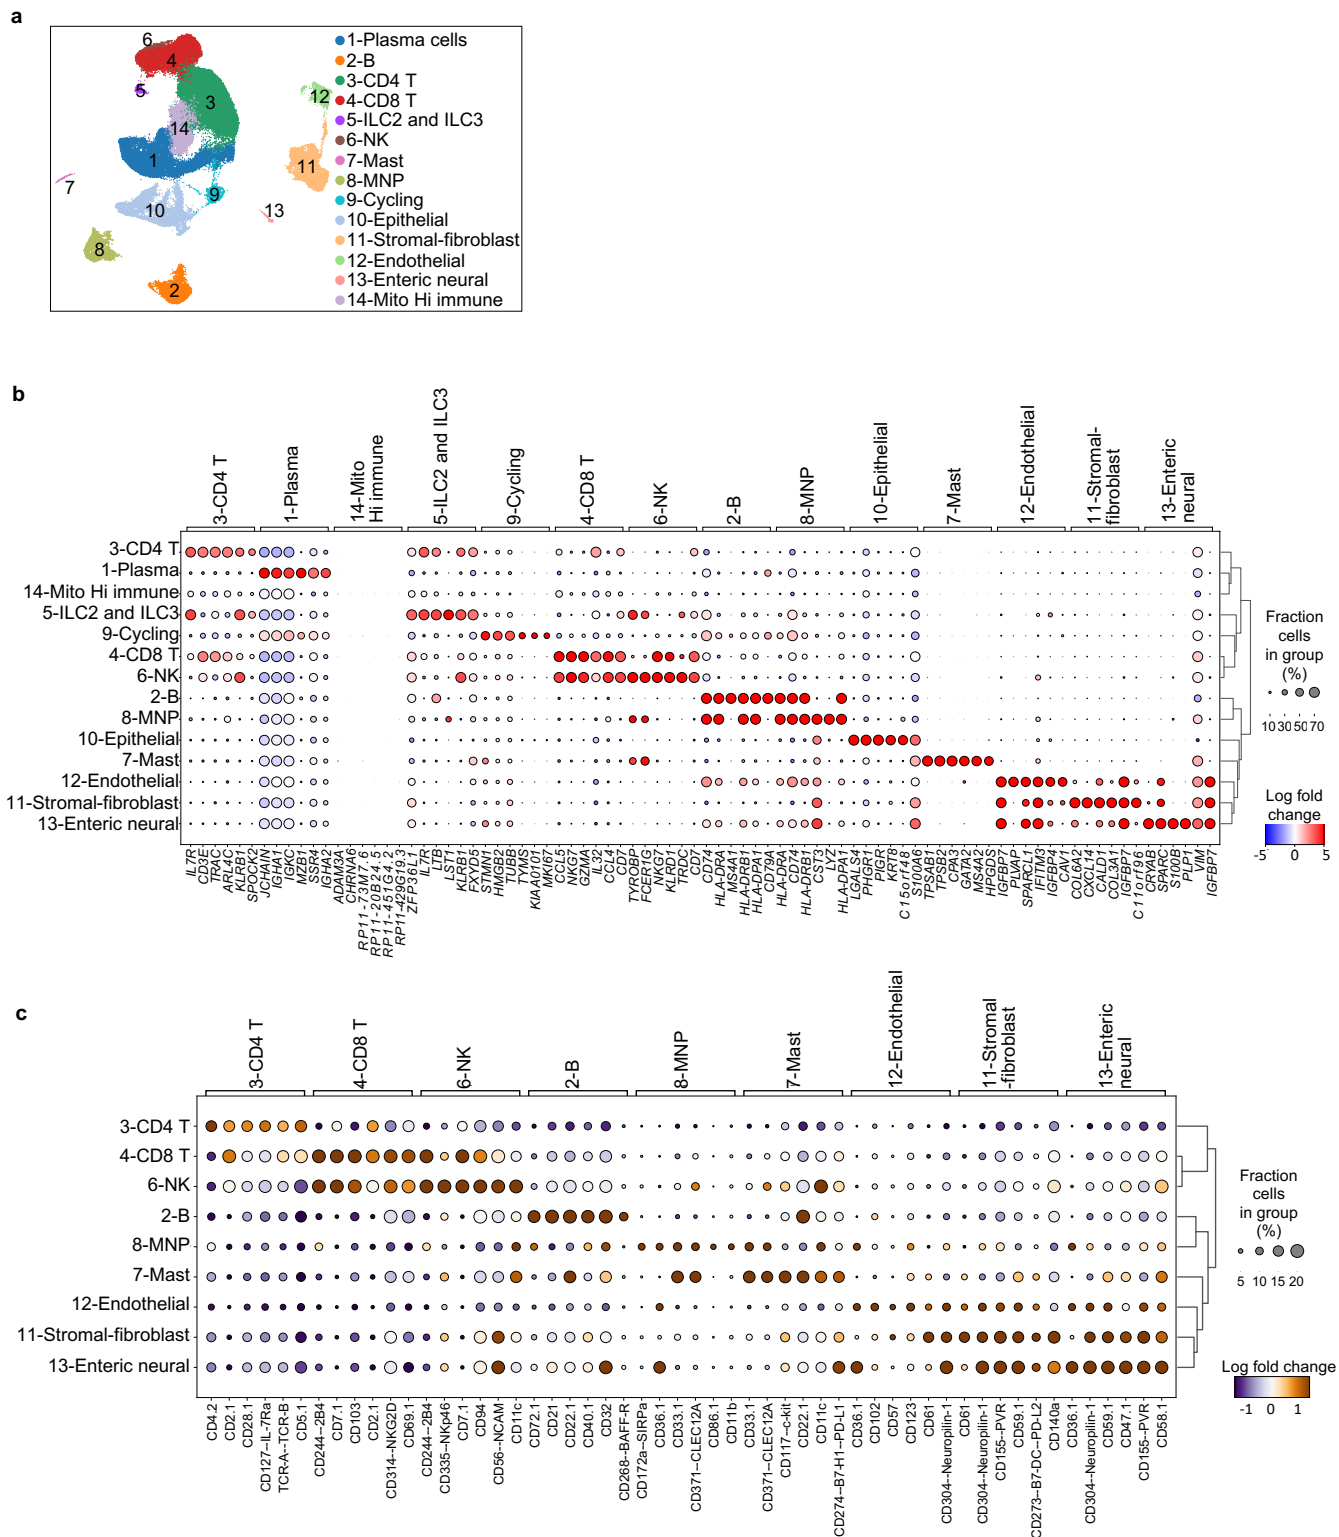

**Supplementary Fig.3| Biopsy scRNA-seq and CITE-seq coarse cell subset annotations and landmark genes and proteins. a**, UMAP visualization of scRNA-seq and CITE-seq for 93,900 cells from HC (n=4), UC (n=4), and UC-VZD (n=4) patients highlighting coarse cell subset annotations. **b-c**, Dot plot representation of landmark (**b**) genes and (**c**) proteins expressed by indicated coarse cell subsets. Genes and proteins were ranked by Wilcoxon rank-sum. Cell subsets without landmark genes or proteins above selected minimum log fold change are not displayed.





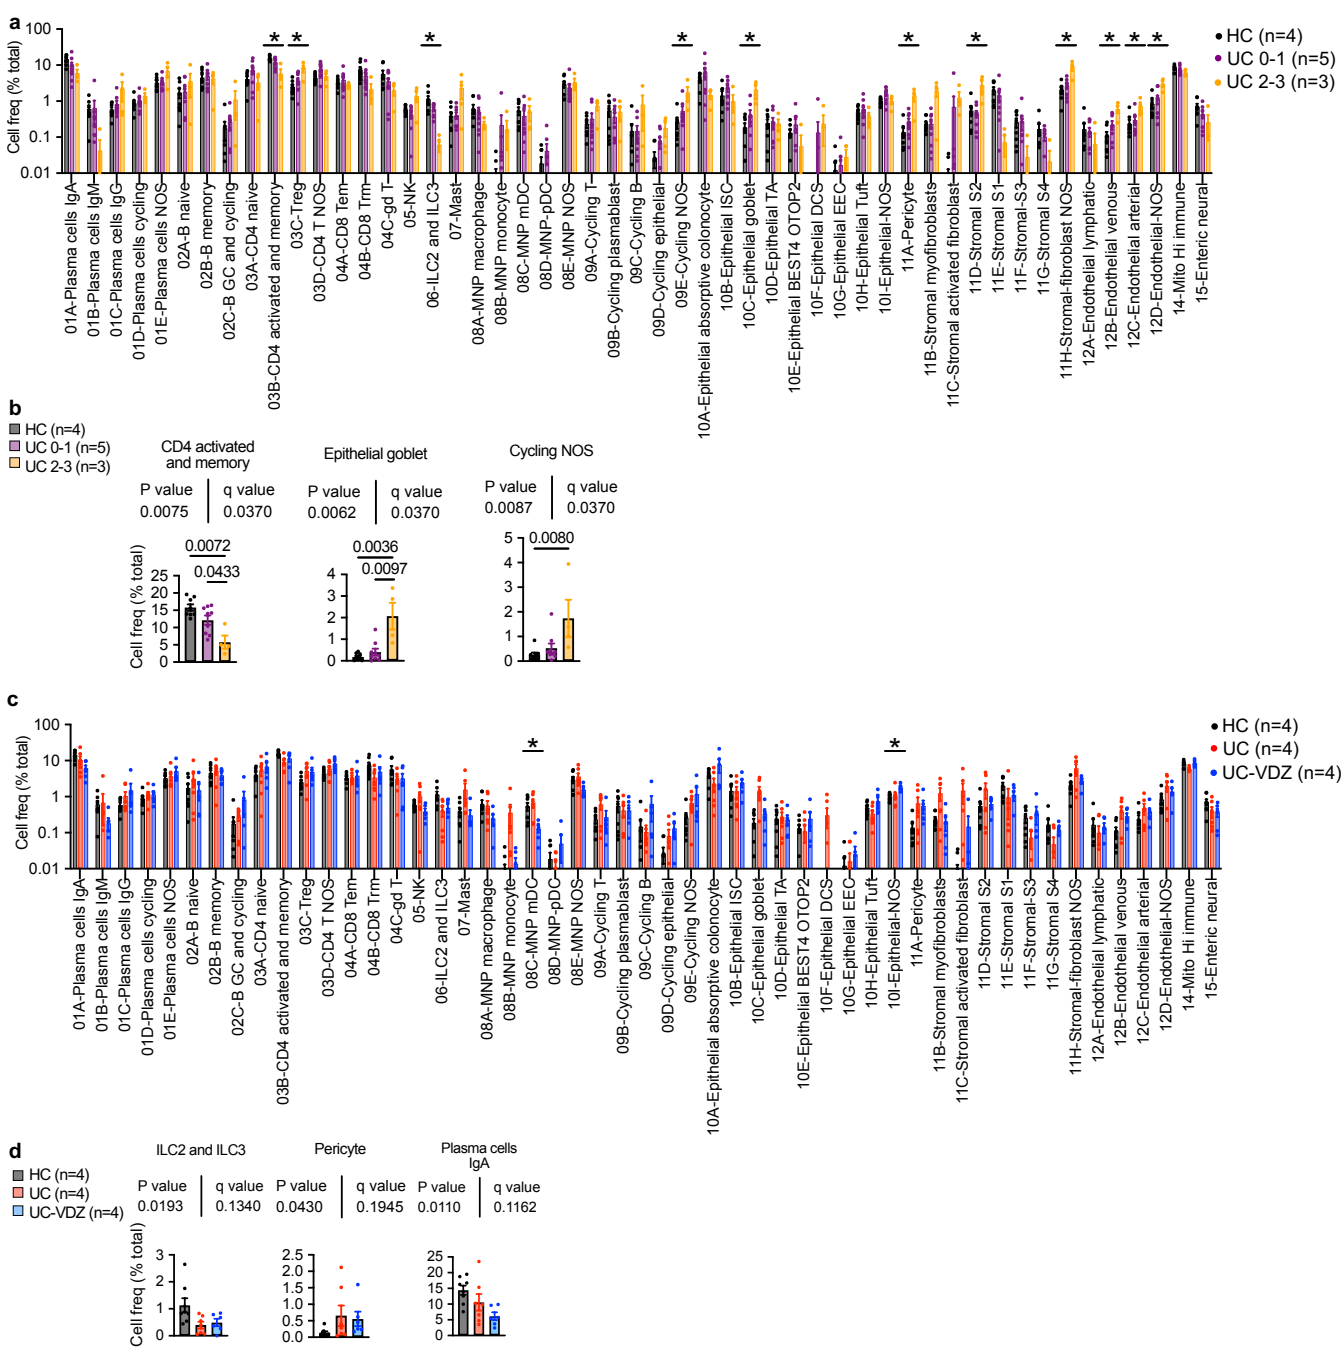

**Supplementary Fig. 6] Biopsy CITE-seq cell subsets that correlated with inflammatory severity, disease status, and VDZ treatment. a-d,** Cell frequency as a percent of total cells per study subject and fine cell annotation stratified by (a,b) endoscopic severity and (c,d) disease and treatment status (mean  $\pm$  SEM; n=number of patients; each dot represents one patient sample). One-way ANOVA Kruskal-Wallis test was performed for each cell subset individually in (a, c), followed by global FDR correction of all p-values for all cell subsets, with  $q < 0.1$  threshold for discovery ( $* = q < 0.1$ , only significant differences are indicated). A nested one-way ANOVA test was also performed on log transformed values treating biopsies as replicates with an unadjusted  $p < 0.05$  as an additional threshold for discovery (\*). Select subsets are shown in (b, d) with exact p-value and q-value; NOS="not otherwise specified".

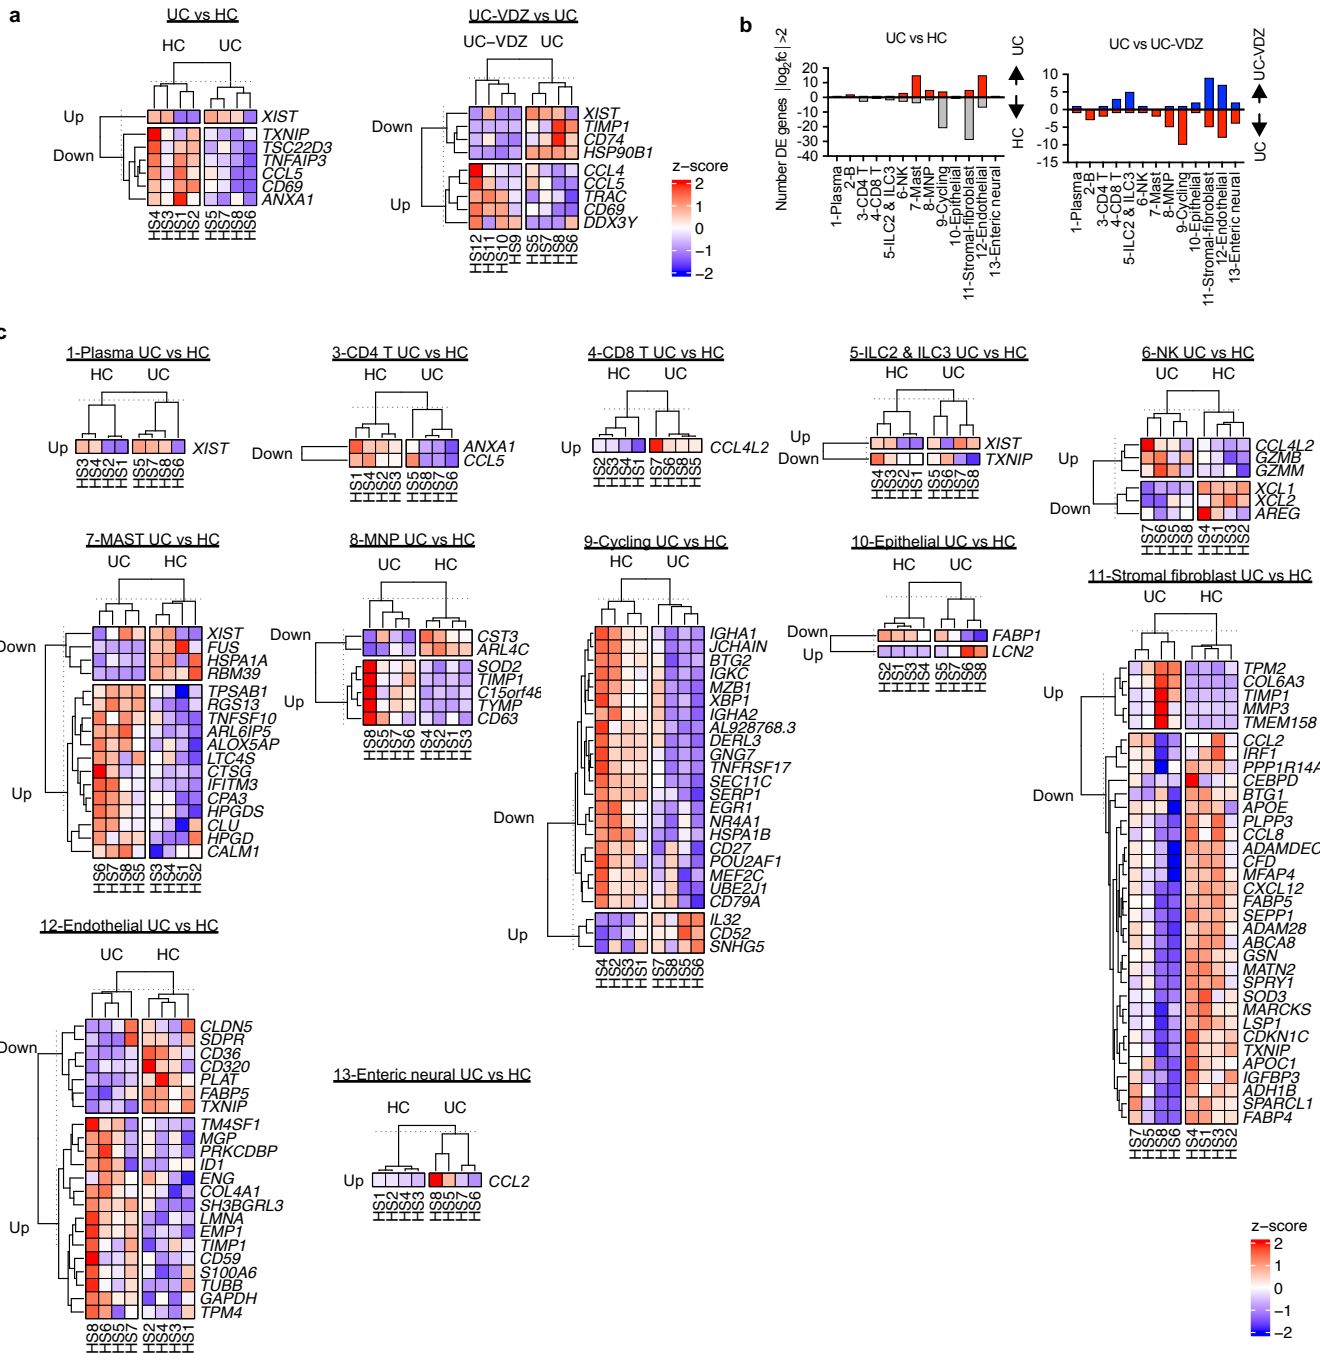

**Supplementary Fig.7| Biopsy scRNA-seq DE genes in cell subsets comparing UC vs HC and UC-VDZ vs UC.** **a**, Heatmap of expression z-scores for scRNA-seq DE genes for all biopsy cells, with  $\log_2fc > 1$  or  $< -1$  and Bonferroni-corrected  $p$ -value  $< 0.1$ , comparing UC (Up/Down) relative to HC and UC-VDZ (Up/Down) relative to UC identified by MAST analysis. **b**, Number of scRNA-seq DE genes in biopsy cell subsets with  $\log_2fc > 2$  or  $< -2$  in UC versus HC and UC-VDZ versus UC identified by MAST analysis. **c**, Heatmap of expression z-scores for scRNA-seq DE genes for the indicated cell subsets with  $\log_2fc > 2$  or  $< -2$  and Bonferroni-corrected  $p$ -value  $< 0.1$  in UC (Up/Down) relative to HC identified by MAST analysis. Ribosomal and mitochondrial genes are not displayed; cell subsets without DE genes are not displayed.

**a**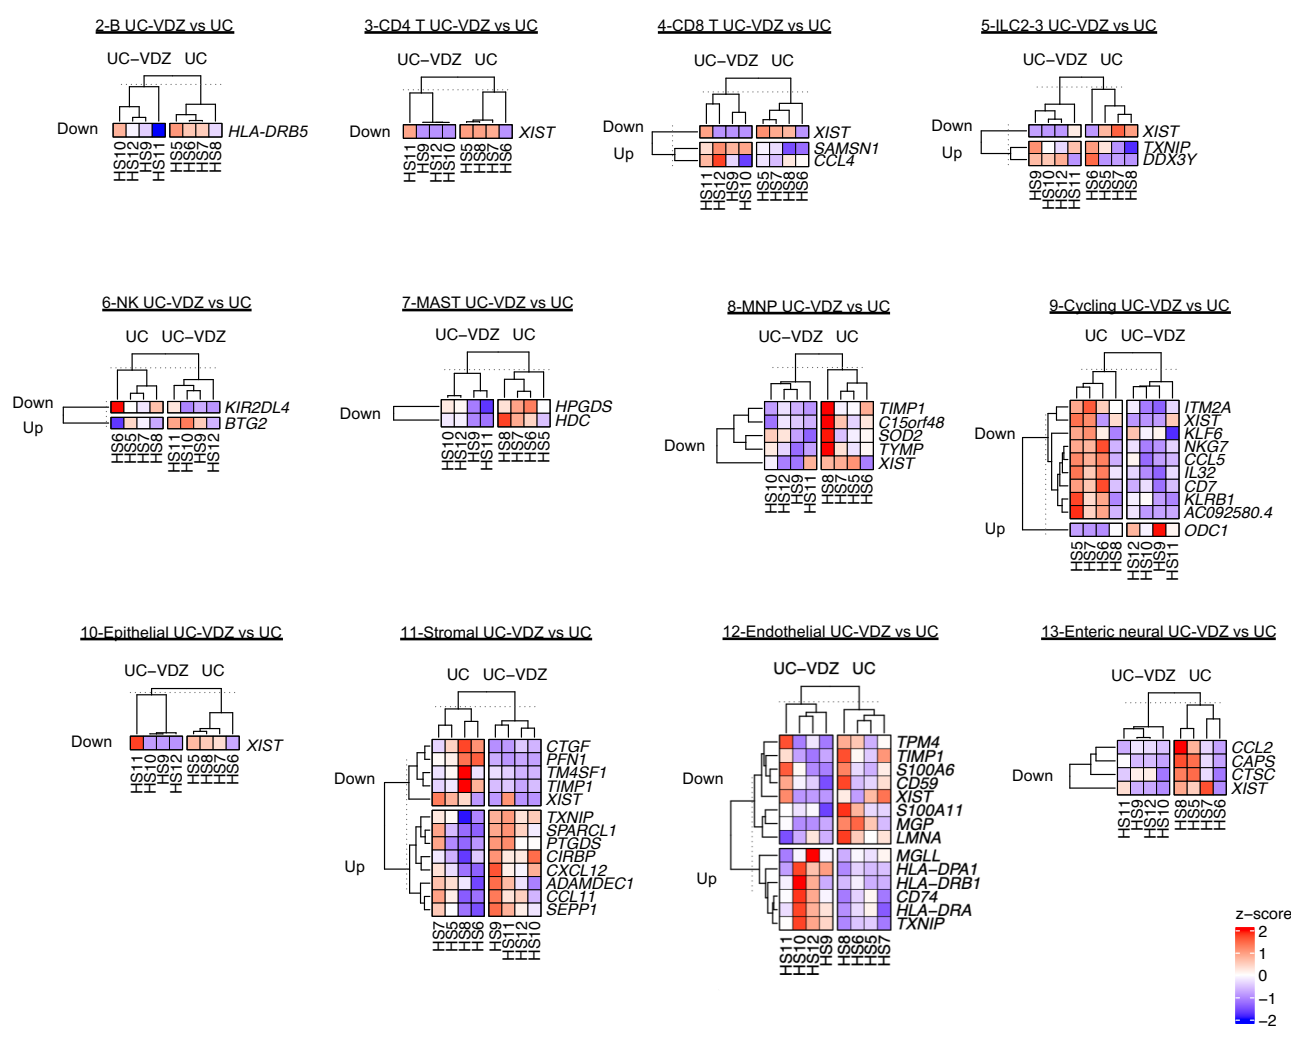**b**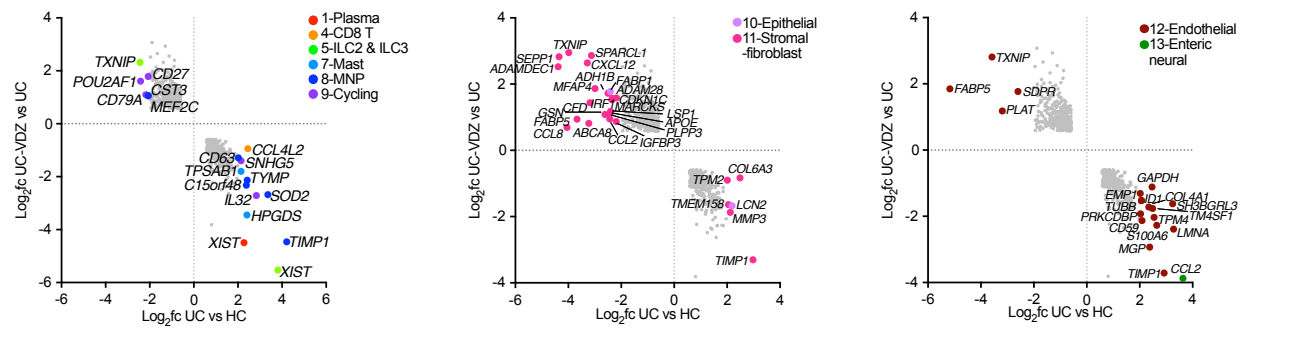

**Supplementary Fig.8| Biopsy scRNA-seq DE genes in cell subsets comparing UC-VZD vs UC and reciprocal expression analysis. a,** Heatmap of expression z-scores for scRNA-seq DE genes for the indicated cell subsets with  $\text{log}_2\text{fc} > 2$  or  $< -2$  and Bonferroni-corrected p-value  $< 0.1$  in UC-VZD (Up/Down) relative to UC identified by MAST analysis. **b,** scRNA-seq DE genes in biopsy coarse cell annotation subsets with  $\text{log}_2\text{fc} > 2$  or  $< -2$  in UC versus HC and an inverse  $\text{log}_2\text{fc}$  for UC-VZD versus UC with  $\text{log}_2\text{fc} < -0.5$  or  $> 0.5$  identified by MAST analysis, respectively. Ribosomal and mitochondrial genes are not displayed; cell subsets without DE genes are not displayed.



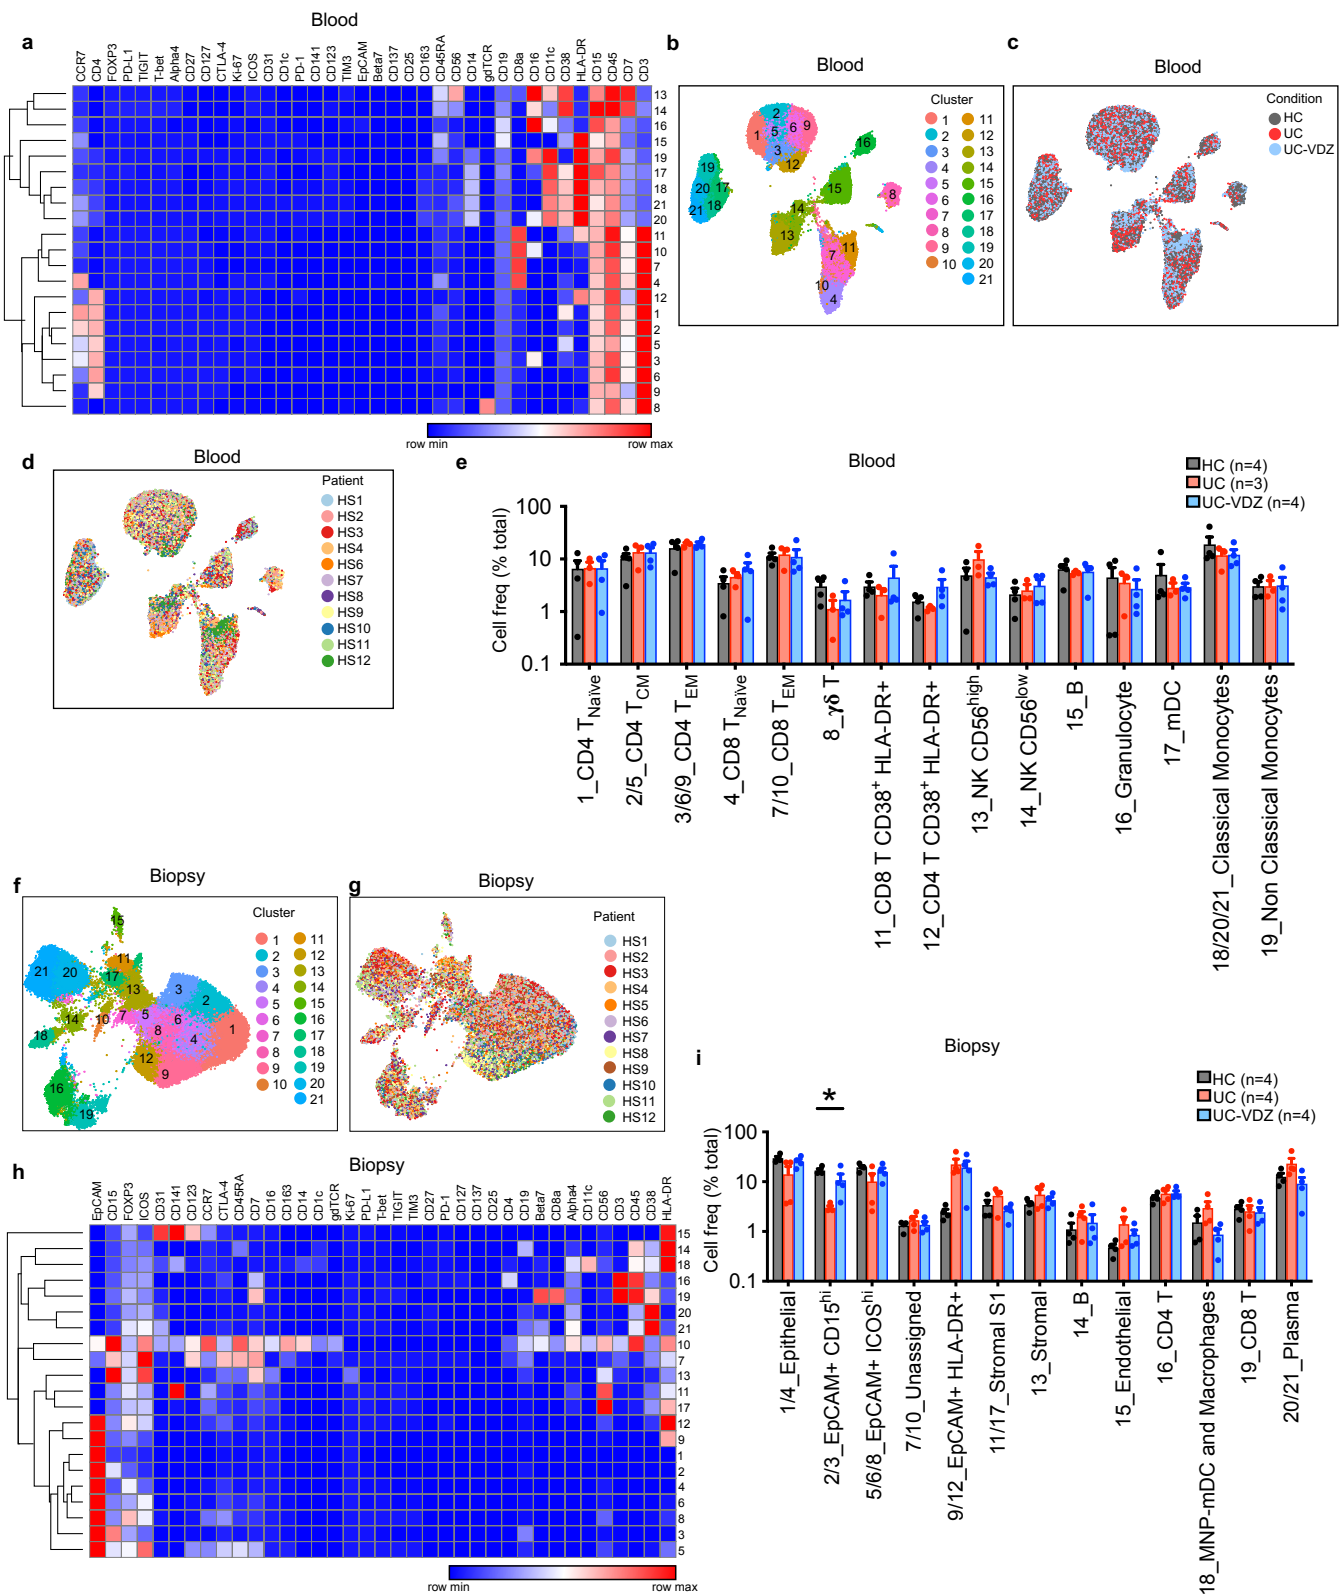

**Supplementary Fig. 9 | Heatmaps and total frequencies obtained from unsupervised analysis of CyTOF data from blood and biopsies. a,h**, Heatmap visualization of mean intensity of each marker for the 21 identified clusters in blood and biopsies, respectively. **b-d**, UMAP visualization of the indicated samples (100,000 out of 1,390,156 live cell events displayed for blood) highlighting (b) FlowSOM identified clusters, (c) disease and treatment status, and (d) patient sample. **e,i**, Cell frequencies for each annotated cell subset per condition for (e) blood and (i) biopsy samples (mean  $\pm$  SEM; n=number of patients; each dot represents one patient sample). **f,g**, UMAP visualization of the indicated samples (60,000 out of 684,249 live cell events displayed for biopsies) highlighting (f) FlowSOM identified clusters, and (g) patient sample. One-way ANOVA Kruskal-Wallis test was performed for each cell subset individually in panels (e) and (i), followed by global FDR correction of all p-values for all cell subsets, with  $q < 0.1$  threshold for discovery (\* $q < 0.1$ , only significant differences are indicated).

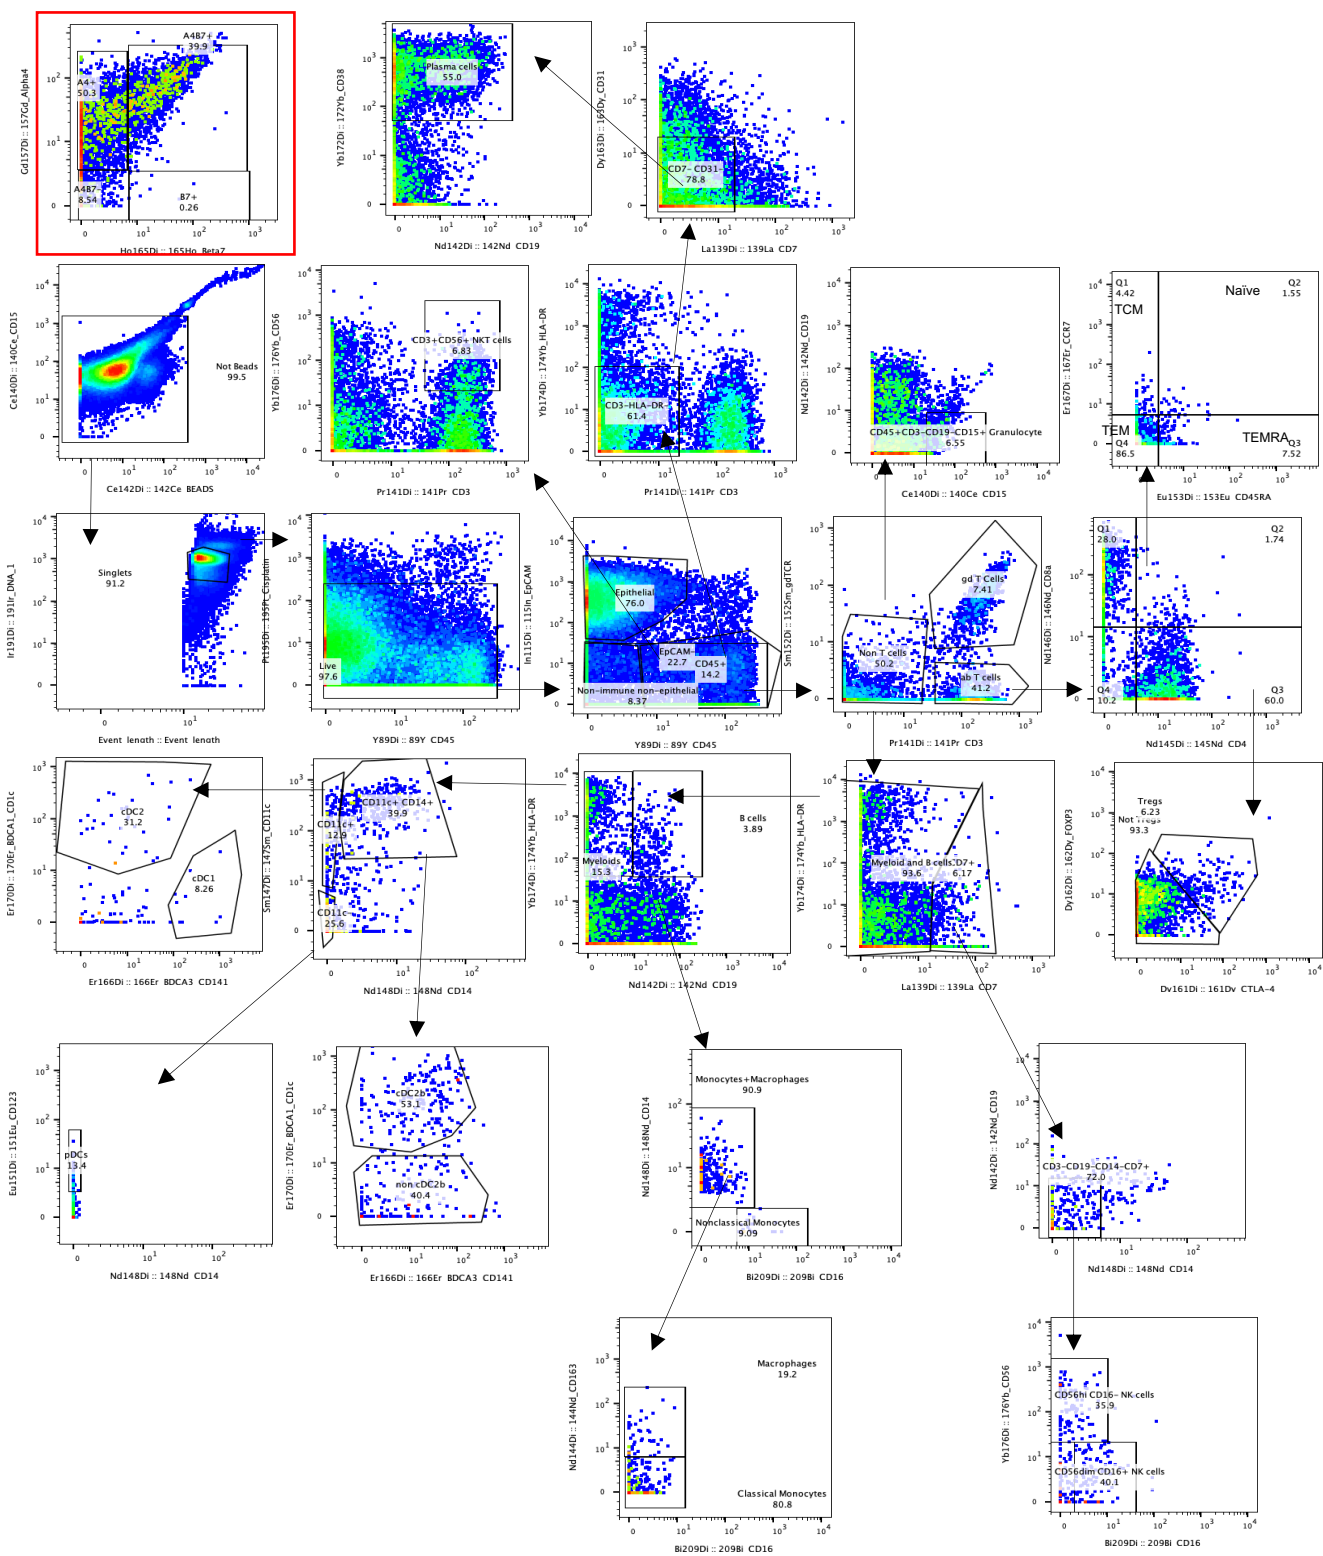

Supplementary Fig. 10| Representative supervised CyTOF gating scheme.



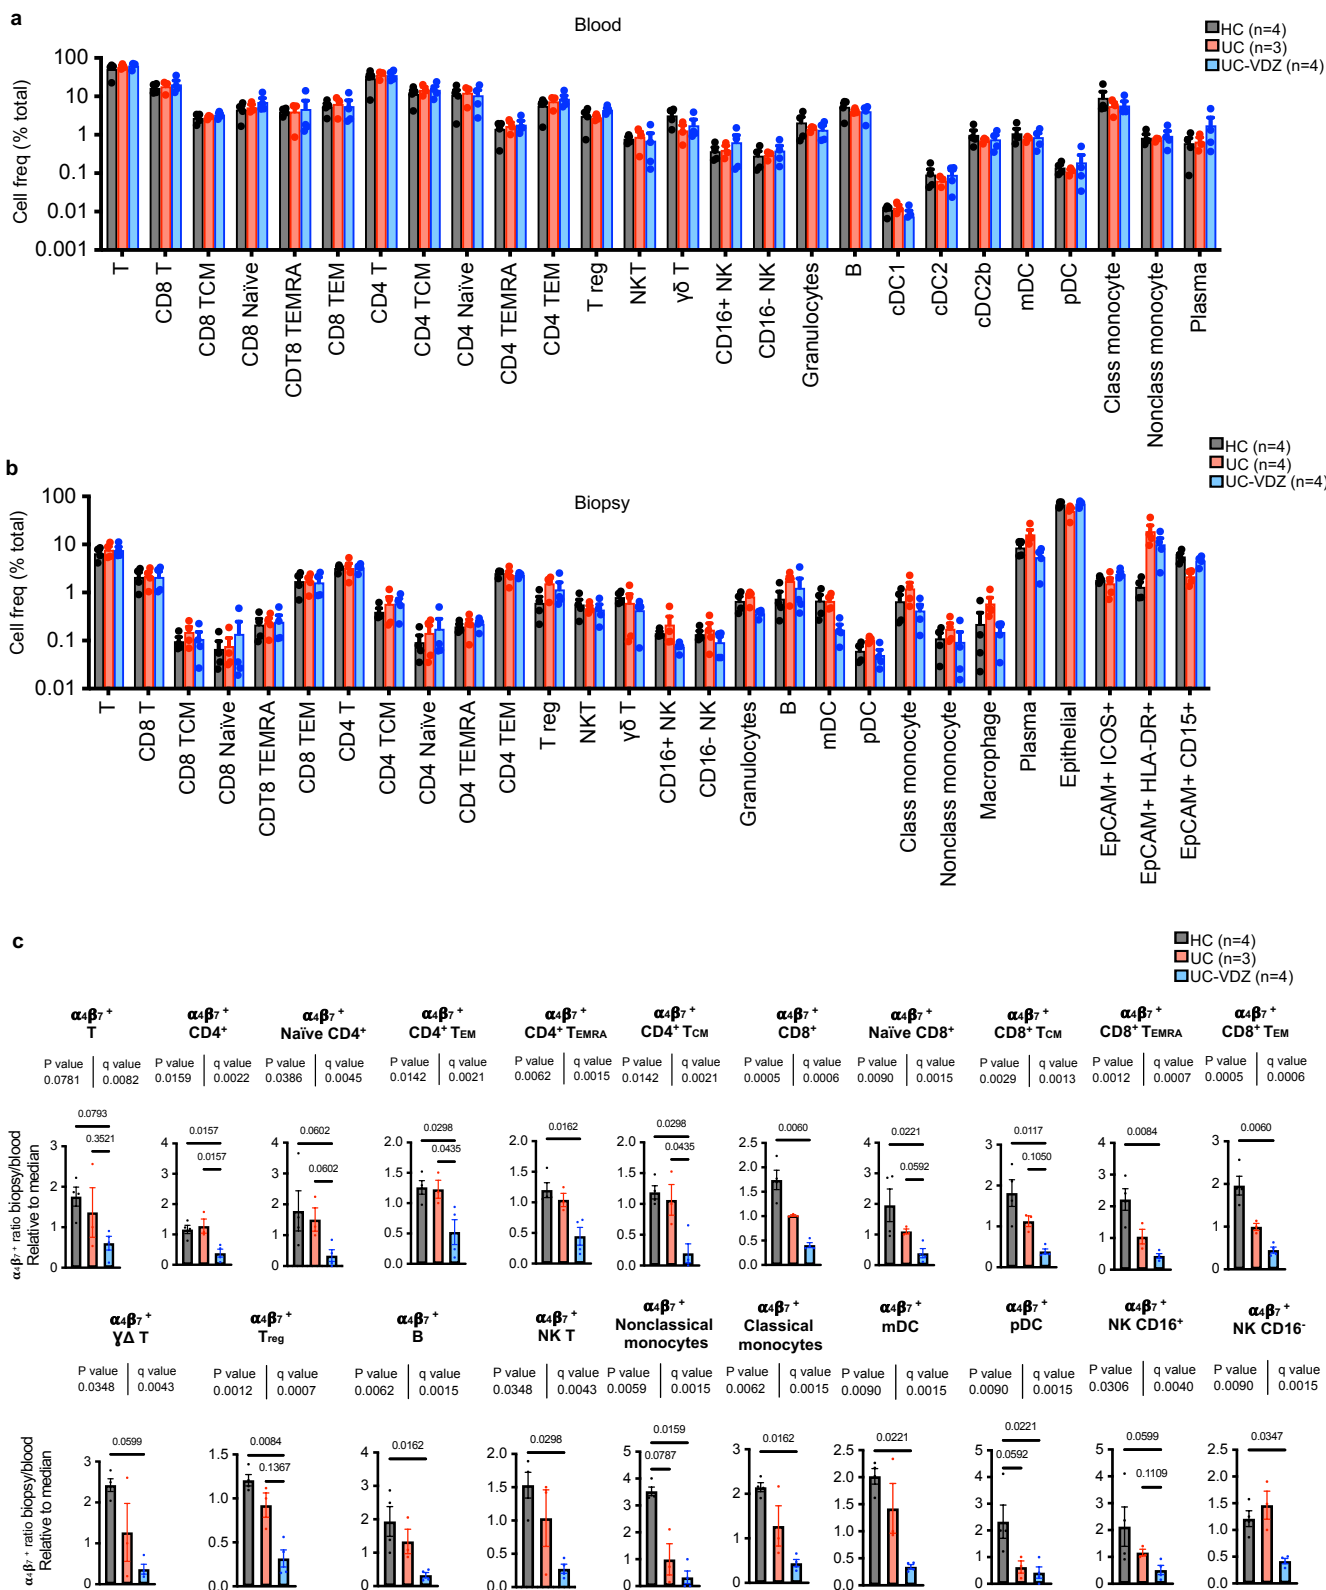

**Supplementary Fig. 11 | Total frequencies obtained from supervised analysis of CyTOF data from blood and biopsies and significant  $\alpha_4\beta_7^+$  cell subsets. a,b**, Cell frequencies for each annotated cell subset per condition in blood and biopsy, respectively. **c**,  $\alpha_4\beta_7^+$  cell frequency in the biopsy versus blood for the indicated cell subsets relative to the median for each cell subset. For panels **a-b**, mean  $\pm$  SEM; n=number of patients; each dot represents one patient sample; multiple one-way ANOVA Kruskal-Wallis test with FDR correction;  $q < 0.1$  threshold for discovery; individual subsets are shown in **(c)** with exact p-value and q-value; individual inter-column q-values are displayed only for cell subsets with overall FDR corrected  $q < 0.01$ . Class monocyte-classical monocyte; Nonclass monocyte-nonclassical monocyte; mDC-cDC1,cDC2,cDC2b.

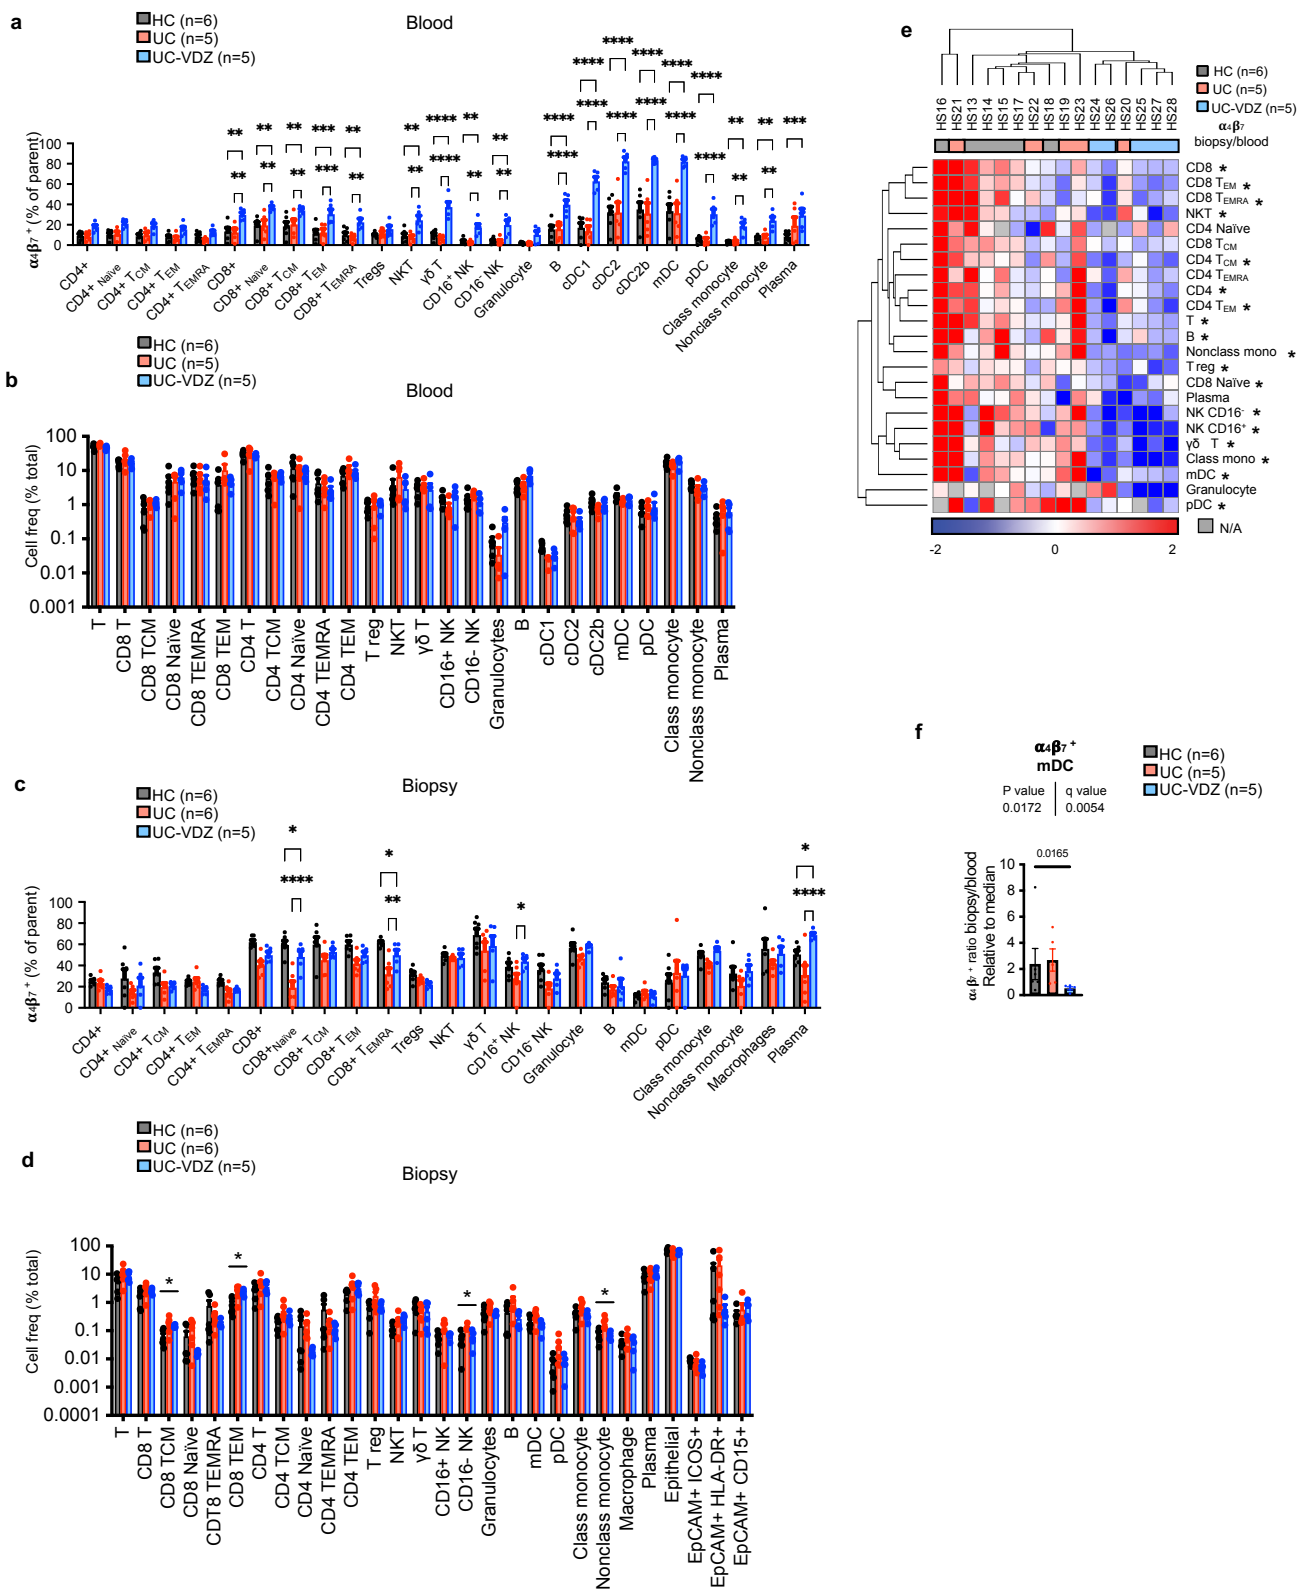

**Supplementary Fig. 12 |  $\alpha_4\beta_7^+$  cell subsets and total frequencies obtained from supervised analysis of CyTOF data from blood and biopsies in a second case control study of patients in near or complete endoscopic remission (HS13-HS30). a,c,** Percentage of  $\alpha_4\beta_7^+$  cells in each defined cell subset per condition for blood and biopsy samples, respectively (mean  $\pm$  SEM; n=number of patients; each dot represents one patient sample; two-way ANOVA comparing HC vs UC-VDZ and UC vs UC-VDZ with FDR correction;  $q < 0.1$  threshold for discovery; \* $q < 0.05$ ; \*\* $q < 0.01$ ; \*\*\* $q < 0.001$ ; and \*\*\*\* $q < 0.0001$ ; and only significant differences are indicated). **b,d,** Cell frequencies for each annotated cell subset per condition in blood and biopsy, respectively (mean  $\pm$  SEM; n=number of patients, multiple one-way ANOVA Kruskal-Wallis test with FDR correction;  $q < 0.1$  threshold for discovery). **e,** Heatmap of biopsy/blood ratio of  $\alpha_4\beta_7^+$  cells for each cell subset by patient (hierarchically clustered by Euclidian distance, average linkage). **f,**  $\alpha_4\beta_7^+$  cell frequency in the biopsy versus blood for mDC relative to the median (mean  $\pm$  SEM; n=number of patients; each dot represents one patient sample).



1000-plex CosMx

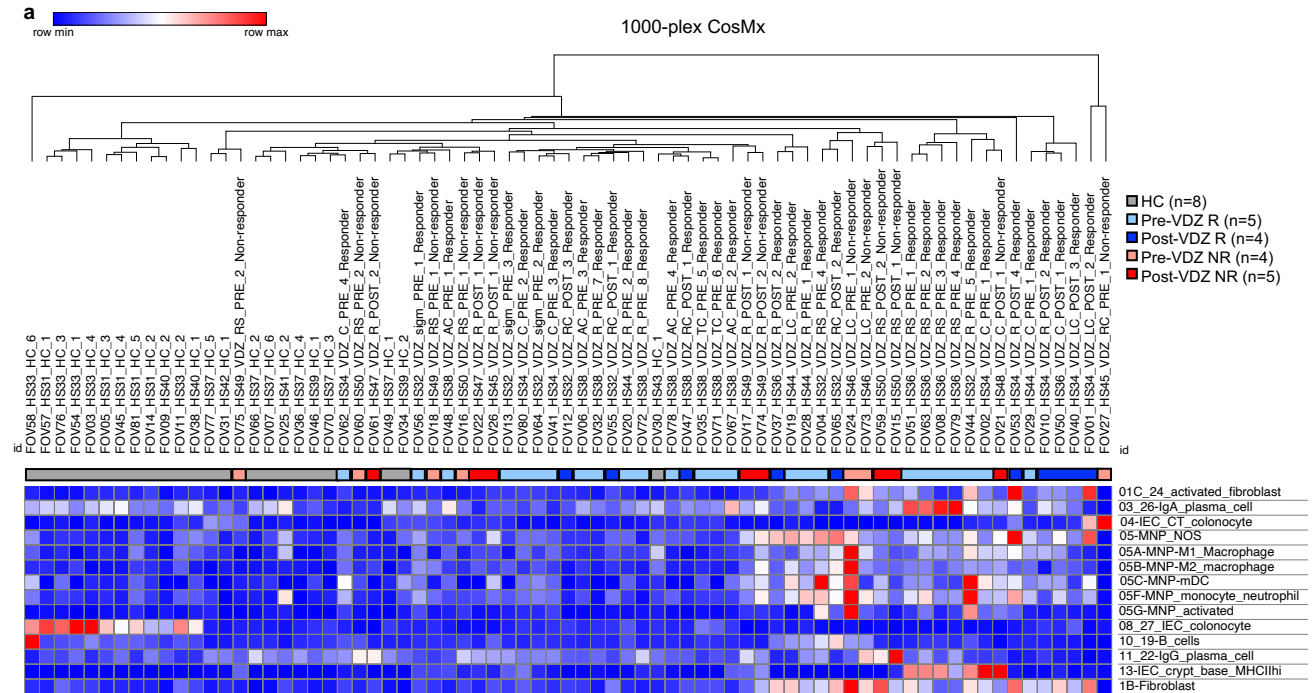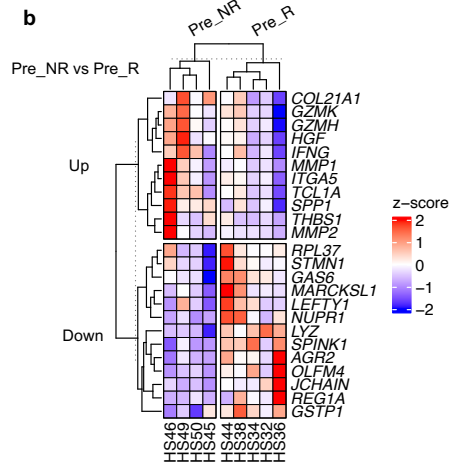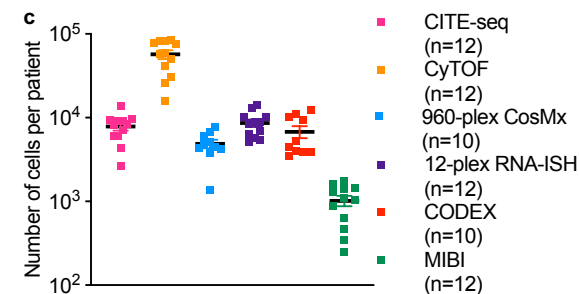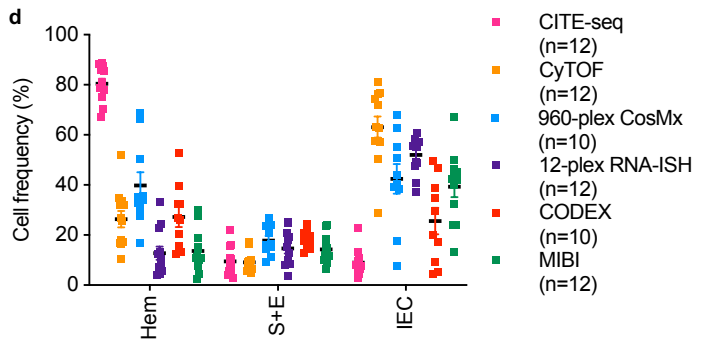

**Supplementary Fig.14| CosMx spatial transcriptomic on TMA from retrospective longitudinal study and comparison of total cells analyzed per patient and cell frequency per tissue compartment among study subjects HS1-HS12. a**, Heatmap of selected cell subsets by patient fov (hierarchically clustered by Euclidian distance, average linkage, columns color-coded by group). **b**, Heatmap of expression z-scores for the indicated genes in VDZ non-responders (Pre\_NR) (Up/Down) relative to responders (Pre\_R) before treatment identified by DESeq2. **c**, Total number of cells analyzed per patient using different multi-omic methods. **d**, Cell frequency per patient expressed as percent of total for the indicated cellular compartment among different multi-omic methods. For **(c, d)**, mean  $\pm$  SEM, n=number of patients, each dot represents one patient sample. Hem-hematopoietic; S+E-stromal + endothelial; IEC-intestinal epithelial cell.

| Patient ID  | Age (y) | Sex | Disease status | UC Medication | Disease duration (y) | Duration VDZ (mo) | Prior anti-TNF exposure | Montreal classification | Mayo Endoscopic subscore | Responder to VDZ |
|-------------|---------|-----|----------------|---------------|----------------------|-------------------|-------------------------|-------------------------|--------------------------|------------------|
| HS1         | 50-59   | M   | HC             | None          | n/a                  | n/a               | No                      | n/a                     | 0                        | n/a              |
| HS2         | 40-49   | M   | HC             | None          | n/a                  | n/a               | No                      | n/a                     | 0                        | n/a              |
| HS3         | 20-29   | F   | HC             | None          | n/a                  | n/a               | No                      | n/a                     | 0                        | n/a              |
| HS4         | 50-59   | F   | HC             | None          | n/a                  | n/a               | No                      | n/a                     | 0                        | n/a              |
|             |         |     |                |               |                      |                   |                         |                         |                          |                  |
| HS5         | 20-29   | F   | UC             | 5-ASA         | 15                   | n/a               | No                      | E2                      | 2                        | n/a              |
| HS6         | 40-49   | M   | UC             | 5-ASA         | 25                   | n/a               | Yes                     | E3                      | 2                        | n/a              |
| HS7         | 60-69   | F   | UC             | 5-ASA         | 7                    | n/a               | No                      | E2                      | 1                        | n/a              |
| HS8         | 50-59   | F   | UC             | 5-ASA         | 5                    | n/a               | No                      | E1                      | 1                        | n/a              |
| Median      |         |     |                |               | 11 (7-18)            |                   |                         |                         |                          |                  |
| HS9         | 50-59   | M   | UC             | VDZ           | 25                   | 8                 | Yes                     | E2                      | 1                        | Yes              |
| HS10        | 30-39   | M   | UC             | VDZ           | 8                    | 7                 | No                      | E2                      | 1                        | Yes              |
| HS11        | 20-29   | F   | UC             | VDZ           | 8                    | 64                | Yes                     | E2                      | 3                        | No               |
| HS12        | 50-59   | M   | UC             | VDZ           | 10                   | 2                 | Yes                     | E3                      | 1                        | Yes              |
|             |         |     |                |               | 9 (8-14)             |                   |                         |                         |                          |                  |
| p-value     | ns      | ns  | p=0.0025       | p<0.0001      | ns                   | n/a               | ns                      | ns                      | p=0.01                   |                  |
| HS13        | 20-29   | M   | HC             | None          | n/a                  | n/a               | No                      | n/a                     | 0                        | n/a              |
| HS14        | 30-39   | M   | HC             | None          | n/a                  | n/a               | No                      | n/a                     | 0                        | n/a              |
| HS15        | 20-29   | F   | HC             | None          | n/a                  | n/a               | No                      | n/a                     | 0                        | n/a              |
| HS16        | 60-69   | F   | HC             | None          | n/a                  | n/a               | No                      | n/a                     | 0                        | n/a              |
| HS17        | 50-59   | F   | HC             | None          | n/a                  | n/a               | No                      | n/a                     | 0                        | n/a              |
| HS18        | 40-49   | F   | HC             | None          | n/a                  | n/a               | No                      | n/a                     | 0                        | n/a              |
|             |         |     |                |               |                      |                   |                         |                         |                          |                  |
| HS19        | 40-49   | M   | UC             | ADA           | 27                   | n/a               | Yes                     | E2                      | 0                        | n/a              |
| HS20*       | 30-39   | F   | UC             | ADA           | 20                   | n/a               | Yes                     | E2                      | 1-2                      | n/a              |
| HS21        | 50-59   | M   | UC             | IFX/MTX       | 6                    | n/a               | Yes                     | E3                      | 0                        | n/a              |
| HS22        | 30-39   | F   | UC             | 5-ASA         | 6                    | n/a               | No                      | E3                      | 0                        | n/a              |
| HS23        | 40-49   | M   | UC             | IFX/AZA       | 10                   | n/a               | Yes                     | E3                      | 1                        | n/a              |
| HS30        | 40-49   | F   | UC             | ADA           | 2                    | n/a               | Yes                     | E3                      | 0                        | n/a              |
|             |         |     |                |               | 8 (5-22)             |                   |                         |                         |                          |                  |
| HS24        | 50-59   | M   | UC             | VDZ           | 5.5                  | 45                | Yes                     | E2                      | 0                        | Yes              |
| HS25        | 60-69   | M   | UC             | VDZ           | 37                   | 5                 | No                      | E3                      | 0                        | Yes              |
| HS26        | 30-39   | F   | UC             | VDZ           | 21                   | 55                | Yes                     | E3                      | 0                        | Yes              |
| HS27        | 30-39   | F   | UC             | VDZ           | 1                    | 6                 | No                      | E1                      | 0                        | Yes              |
| HS28        | 40-49   | M   | UC             | VDZ           | 8                    | 45                | Yes                     | E1                      | 0                        | Yes              |
|             |         |     |                |               | 8 (3-29)             |                   |                         |                         |                          |                  |
| p-value     | ns      | ns  | p=0.0002       | p<0.0001      | ns                   | n/a               | p=0.0329                | ns                      | ns                       |                  |
| HS31 (HS16) | 60-69   | F   | HC             | None          | n/a                  | n/a               | No                      | n/a                     | 0                        | n/a              |
| HS33 (HS14) | 30-39   | M   | HC             | None          | n/a                  | n/a               | No                      | n/a                     | 0                        | n/a              |
| HS35 (HS15) | 20-29   | F   | HC             | None          | n/a                  | n/a               | No                      | n/a                     | 0                        | n/a              |
| HS37 (HS13) | 20-29   | M   | HC             | None          | n/a                  | n/a               | No                      | n/a                     | 0                        | n/a              |
| HS39        | 20-29   | F   | HC             | None          | n/a                  | n/a               | No                      | n/a                     | 0                        | n/a              |
| HS40        | 60-69   | M   | HC             | None          | n/a                  | n/a               | No                      | n/a                     | 0                        | n/a              |
| HS41        | 50-59   | M   | HC             | None          | n/a                  | n/a               | No                      | n/a                     | 0                        | n/a              |
| HS42        | 40-49   | M   | HC             | None          | n/a                  | n/a               | No                      | n/a                     | 0                        | n/a              |
| HS43        | 50-59   | M   | HC             | None          | n/a                  | n/a               | No                      | n/a                     | 0                        | n/a              |
|             |         |     |                |               |                      |                   |                         |                         |                          |                  |
| HS32        | 20-29   | F   | UC             | VDZ           | 2                    | 4                 | No                      | E2                      | pre 2 ; post 0           | Yes              |
| HS34 (HS27) | 30-39   | F   | UC             | VDZ           | 1                    | 6                 | No                      | E1                      | pre 2; post 0            | Yes              |
| HS36        | 40-49   | M   | UC             | VDZ           | 3                    | 2                 | Yes                     | E2                      | pre 3; post 0            | Yes              |
| HS38 (HS9)  | 50-59   | M   | UC             | VDZ           | 25                   | 7                 | Yes                     | E3                      | pre 2; post 0            | Yes              |
| HS44        | 30-39   | F   | UC             | VDZ           | 2                    | 2                 | No                      | E1                      | pre 1                    | Yes              |
| HS45        | 40-49   | M   | UC             | VDZ           | 14                   | 19                | Yes                     | E2                      | pre 1; post 3            | No               |
| HS46        | 40-49   | n/a | UC             | VDZ           | 21                   | 2                 | Yes                     | E2                      | pre 3; post 3            | No               |
| HS47        | 30-39   | M   | UC             | VDZ           | 11                   | 5                 | Yes                     | E2                      | post 3                   | No               |
| HS48        | 70-79   | M   | UC             | VDZ           | 8                    | 6                 | Yes                     | E3                      | pre 2; post 2            | No               |
| HS49        | 30-39   | F   | UC             | VDZ           | 2                    | 3                 | Yes                     | E2                      | pre 2; post 3            | No               |
| HS50        | 20-29   | M   | UC             | VDZ           | 0                    | 5                 | Yes                     | E2                      | pre 2; post 2            | No               |
|             |         |     |                |               | 3 (2-14)             |                   |                         |                         |                          |                  |
| p-value     | ns      | ns  | p<0.0001       | p<0.0001      | n/a                  | n/a               | p=0.0010                | ns                      | pre, ns; post, p=0.0016  |                  |

**Supplementary Table 1. Baseline demographic and clinical data for study participants.** Categorical variables were analyzed by Chi-square test and continuous variables were compared using one-way ANOVA with FDR correction or Mann-Whitney test where appropriate. ns, not significant; n/a, not applicable; pre, pre-VDZ treatment; post, post-VDZ treatment. \*HS20 had a short segment of moderate proctitis, otherwise in endoscopic remission with no change in therapy. HS31, HS33, HS35, HS37, HS34, HS38 were additional samples from HS16, HS14, HS15, HS13, HS27, and HS9, respectively. ADA-adalimumab; IFX-infliximab; VDZ-vedolizumab; AZA-azathioprine; 5-ASA-5-aminosalicylic acid.

| Patient ID | Disease status | Medication | Biopsy            |                          | Geboes grade | Biopsy sample ID | Blood     |                           | Blood CyTOF | Biopsy CyTOF | 12-plex RNA- |            |           | CosMx SMI 960-plex |
|------------|----------------|------------|-------------------|--------------------------|--------------|------------------|-----------|---------------------------|-------------|--------------|--------------|------------|-----------|--------------------|
|            |                |            | location-severity | Mayo Endoscopic subscore |              |                  | scRNA-seq | Biopsy scRNA-seq CITE-seq |             |              | ISH          | CODEX      | MIBI      |                    |
| HS1        | HC             | N/A        | R-0               | 0                        | 0.0          | HS1-CLR1         | Y         | Y                         | Y           | Y            | Y (1-core)   | N/A        | N/A       | Y (1-FOV)          |
|            |                |            | L-0               |                          |              | HS1-CLL1         | Y         | Y                         |             |              | Y (1-core)   | N/A        | Y (2-FOV) | Y (2-FOV)          |
| HS2        | HC             | N/A        | R-0               | 0                        | 1.1          | HS2-CLR1         | Y         | Y                         | Y           | Y            | Y (1-core)   | Y (1-core) | Y (3-FOV) | Y (1-FOV)          |
|            |                |            | L-0               |                          |              | HS2-CLL1         | Y         | Y                         |             |              | Y (1-core)   | Y (1-core) | Y (3-FOV) | Y (1-FOV)          |
| HS3        | HC             | N/A        | R-0               | 0                        | 0.0          | HS3-CLR1         | Y         | Y                         | Y           | Y            | N/A          | Y (1-core) | N/A       | Y (1-FOV)          |
|            |                |            | L-0               |                          |              | HS3-CLL1         | Y         | Y                         |             |              | Y (1-core)   | Y (1-core) | Y (1-FOV) | N/A                |
| HS4        | HC             | N/A        | R-0               | 0                        | 0.0          | HS4-CLR1         | Y         | Y                         | Y           | Y            | Y (1-core)   | N/A        | N/A       | Y (1-FOV)          |
|            |                |            | L-0               |                          |              | HS4-CLL1         | Y         | Y                         |             |              | Y (1-core)   | Y (1-core) | Y (1-FOV) | Y (1-FOV)          |
| HS5        | UC             | 5-ASA      | R-0               | 2                        | 0.0          | HS5-CLR1         | N/A       | Y                         | N/A         | Y            | Y (1-core)   | Y (1-core) | Y (2-FOV) | Y (1-FOV)          |
|            |                |            | L-2               |                          |              | HS5-CLL1         | Y         | Y                         |             |              | Y (1-core)   | N/A        | Y (1-FOV) | N/A                |
| HS6        | UC             | 5-ASA      | R-2               | 2                        | 2A.2         | HS6-CLR1         | Y         | Y                         | Y           | Y            | Y (1-core)   | N/A        | Y (2-FOV) | N/A                |
|            |                |            | L-2               |                          |              | HS6-CLL1         | Y         | Y                         |             |              | N/A          | N/A        | N/A       | N/A                |
| HS7        | UC             | 5-ASA      | R-1               | 1                        | 1.1          | HS7-CLR1         | Y         | Y                         | Y           | Y            | Y (1-core)   | Y (1-core) | N/A       | Y (1-FOV)          |
|            |                |            | L-0               |                          |              | HS7-CLL1         | Y         | Y                         |             |              | Y (1-core)   | Y (1-core) | Y (2-FOV) | Y (1-FOV)          |
| HS8        | UC             | 5-ASA      | L-1               | 1                        | 3.2          | HS8-CLL1         | Y         | Y                         | Y           | Y            | Y (1-core)   | Y (1-core) | Y (1-FOV) | Y (1-FOV)          |
| HS9        | UC             | VDZ        | R-0               | 1                        | 0.0          | HS9-CLR1         | Y         | Y                         | Y           | Y            | Y (1-core)   | Y (1-core) | Y (3-FOV) | N/A                |
|            |                |            | L-1               |                          |              | HS9-CLL1         | Y         | Y                         |             |              | Y (1-core)   | Y (1-core) | Y (3-FOV) | N/A                |
| HS10       | UC             | VDZ        | R-0               | 1                        | 1.1          | HS10-CLR1        | Y         | Y                         | Y           | Y            | Y (1-core)   | Y (1-core) | Y (1-FOV) | Y (1-FOV)          |
|            |                |            | L-1               |                          |              | HS10-CLL1        | Y         | N/A                       |             |              | N/A          | N/A        | N/A       | Y (1-FOV)          |
| HS11       | UC             | VDZ        | R-0               | 3                        | 0.1          | HS11-CLR1        | Y         | Y                         | Y           | Y            | N/A          | N/A        | N/A       | Y (1-FOV)          |
|            |                |            | L-3               |                          |              | HS11-CLL1        | Y         | Y                         |             |              | Y (1-core)   | Y (1-core) | Y (1-FOV) | Y (1-FOV)          |
| HS12       | UC             | VDZ        | R-1               | 1                        | 1.2          | HS12-CLR1        | Y         | Y                         | Y           | Y            | Y (1-core)   | Y (1-core) | Y (3-FOV) | N/A                |
|            |                |            | L-1               |                          |              | HS12-CLL1        | Y         | N/A                       |             |              | Y (1-core)   | Y (1-core) | Y (3-FOV) | Y (1-FOV)          |

**Supplementary Table 2. Biospecimens analyzed by each multi-omics method.** R, right colon; L, left colon; 5-ASA, 5-aminosalicylate; CLR1, right colon biopsy 1; CLL1, left colon biopsy; Y, yes; N/A not applicable. FOV-field of view

| Assay type          | Target                         | Ion channel / DNA barcode | Metal / DNA barcode ID | Clone/Probe | Concentration (µg/ml) /Dilution (ratio) | h5ad file symbol            | Catalog # | Vendor    |
|---------------------|--------------------------------|---------------------------|------------------------|-------------|-----------------------------------------|-----------------------------|-----------|-----------|
| CITE-seq (TotalSeq) | CD103 (Integrin αE)            | GACCTCATTGTGAAT           | A0145                  | Ber-ACT8    | proprietary                             | CD103                       | 399907    | BioLegend |
|                     | CD35                           | ACTTCCGTCGATCTT           | A0167                  | E11         | proprietary                             | CD35                        | 399907    | BioLegend |
|                     | CD25                           | TTTGTCTGTACGCC            | A0085                  | BC96        | proprietary                             | CD25                        | 399907    | BioLegend |
|                     | CD62L                          | GTCCCTGCAACTTGA           | A0147                  | DREG-56     | proprietary                             | CD62L                       | 399907    | BioLegend |
|                     | CD3                            | CTCATTGTAACCTCT           | A0034                  | UCHT1       | proprietary                             | CD3                         | 399907    | BioLegend |
|                     | CD33                           | TAACCTCAGGCGCTAT          | A0052                  | P67.6       | proprietary                             | CD33.1                      | 399907    | BioLegend |
|                     | CD4                            | TGTTCCCGCTCAACT           | A0072                  | RPA-T4      | proprietary                             | CD4.2                       | 399907    | BioLegend |
|                     | CD58 (LFA-3)                   | GTTTCATGGACGAC            | A0174                  | TS2/9       | proprietary                             | CD58.1                      | 399907    | BioLegend |
|                     | CD8a                           | GCTGCGCTTCCATT            | A0080                  | RPA-T8      | proprietary                             | CD8a                        | 399907    | BioLegend |
|                     | CD56                           | TCCTTTCTGATAGG            | A0047                  | 5.1H11      | proprietary                             | CD56-NCAM                   | 399907    | BioLegend |
|                     | CD11b                          | GACAAGTGATCTGCA           | A0161                  | ICRF44      | proprietary                             | CD11b                       | 399907    | BioLegend |
|                     | CD183 (CXCR3)                  | GCGATGGTAGATTAT           | A0140                  | G025H7      | proprietary                             | CD183-CXCR3                 | 399907    | BioLegend |
|                     | CD30                           | TCAGGGTGTGCTGTA           | A0028                  | BY88        | proprietary                             | CD30                        | 399907    | BioLegend |
|                     | CD336 (Nkp44)                  | GGGCAATTAGCGAGT           | A0802                  | P44-8       | proprietary                             | CD336-Nkp44                 | 399907    | BioLegend |
|                     | CD69                           | GTCTCTGGCTTAAA            | A0146                  | FN50        | proprietary                             | CD69.1                      | 399907    | BioLegend |
|                     | CD335 (Nkp46)                  | ACAATTTGAAACGCG           | A0101                  | 9E2         | proprietary                             | CD335-Nkp46                 | 399907    | BioLegend |
|                     | CD49f                          | TTCCGAGGATGATCT           | A0070                  | GoH3        | proprietary                             | CD49f                       | 399907    | BioLegend |
|                     | CD161                          | GTACGAGCTCTTCT            | A0149                  | HP-3G10     | proprietary                             | CD161                       | 399907    | BioLegend |
|                     | CD45RO                         | CTCCGAATCATGTTG           | A0087                  | UCHL1       | proprietary                             | CD45RO                      | 399907    | BioLegend |
|                     | CD20                           | TTCTGGTCCCTAGA            | A0100                  | 2H7         | proprietary                             | CD20                        | 399907    | BioLegend |
|                     | KLRF1 (MAFA)                   | CTTATTTCTGCCTC            | A0153                  | SA231A2     | proprietary                             | KLRF1-MAFA                  | 399907    | BioLegend |
|                     | CD19                           | CTGGGCAATTACTCG           | A0050                  | HIB19       | proprietary                             | CD19.1                      | 399907    | BioLegend |
|                     | CD32                           | GCTTCCGAATTACCG           | A0142                  | FUN-2       | proprietary                             | CD32                        | 399907    | BioLegend |
|                     | CD276 (B7-H3)                  | GACTGGGAGGGTATT           | A0010                  | DCN.70      | proprietary                             | CD276-B7-H3                 | 399907    | BioLegend |
|                     | CD279 (PD-1)                   | ACAGCGCCGATTTA            | A0088                  | EH12.2H7    | proprietary                             | CD279-PD-1                  | 399907    | BioLegend |
|                     | CD197 (CCR7)                   | AGTTCAGTCAACCGA           | A0148                  | G043H7      | proprietary                             | CD197-CCR7                  | 399907    | BioLegend |
|                     | CD252 (OX40L)                  | TTTAGTGATCCGACT           | A0021                  | 11C3.1      | proprietary                             | N/A                         | 399907    | BioLegend |
|                     | CD223 (LAG-3)                  | CATTGTCTGCGGGT            | A0152                  | 11C3C65     | proprietary                             | CD223-LAG-3                 | 399907    | BioLegend |
|                     | HLA-DR                         | AATAGCGAGCAAGTA           | A0159                  | L243        | proprietary                             | HLA-DR                      | 399907    | BioLegend |
|                     | CD45RA                         | TCAATCCTTCCGCTT           | A0063                  | HL100       | proprietary                             | CD45RA                      | 399907    | BioLegend |
|                     | CD196 (CCR6)                   | GATCCCTTTGTCACT           | A0143                  | G034E3      | proprietary                             | CD196-CCR6                  | 399907    | BioLegend |
|                     | CD2                            | TACGATTTGTCAGGG           | A0367                  | TS1/8       | proprietary                             | CD2.1                       | 399907    | BioLegend |
|                     | CD326 (E <sub>p</sub> -CAM)    | TTCCGAGCAAGTATG           | A0123                  | 9C4         | proprietary                             | CD326-E <sub>p</sub> CAM    | 399907    | BioLegend |
|                     | CD169 (Sialoadhesin, Siglec-1) | TACTACGCGTGTGG            | A0206                  | 7-239       | proprietary                             | CD169-Sialoadhesin-Siglec-1 | 399907    | BioLegend |
|                     | CD41                           | ACGTTGTGGCGTTGT           | A0353                  | HIP8        | proprietary                             | CD41                        | 399907    | BioLegend |
|                     | CD49b                          | GCTTTCTTCAGTATG           | A0371                  | P1E6-C5     | proprietary                             | CD49b                       | 399907    | BioLegend |
|                     | CD303 (BDCA-2)                 | GAGATGTCGGAATTT           | A0370                  | 201A        | proprietary                             | CD303-BDCA-2                | 399907    | BioLegend |
|                     | CD29                           | GTATTCCTCCAGTCA           | A0369                  | TS2/16      | proprietary                             | CD29                        | 399907    | BioLegend |
|                     | CD184 (CXCR4)                  | TCAGGTCTTTCAAC            | A0366                  | 12G5        | proprietary                             | CD184-CXCR4                 | 399907    | BioLegend |
|                     | CD98                           | GCACCAACAGCCATT           | A0374                  | MEM-108     | proprietary                             | CD98                        | 399907    | BioLegend |
|                     | CD124 (IL-4Rα)                 | CCGTCCTGATAGATG           | A0363                  | G077F6      | proprietary                             | N/A                         | 399907    | BioLegend |
|                     | CD135 (Flt-3/Fik-2)            | CAGTAGATGGAGCAT           | A0351                  | BV10A4H2    | proprietary                             | CD135                       | 399907    | BioLegend |
|                     | CD370 (CLEC9A/DNGR1)           | CTGCATTTTCAGTAA           | A0207                  | 8F9         | proprietary                             | CD370-CLEC9A-DNGR1          | 399907    | BioLegend |
|                     | CD21                           | AACCTAGTAGTTCGG           | A0181                  | Bu32        | proprietary                             | CD21                        | 399907    | BioLegend |
|                     | CD39                           | TTACCTGGTATCCGT           | A0176                  | A1          | proprietary                             | CD39                        | 399907    | BioLegend |
|                     | CD141 (Thrombomodulin)         | GGATAACCGCGCTTT           | A0163                  | M80         | proprietary                             | CD141-Thrombomodulin        | 399907    | BioLegend |
|                     | CD64                           | AAGTATGCCCTACGA           | A0162                  | 10.1        | proprietary                             | CD64                        | 399907    | BioLegend |
|                     | CD152 (CTLA-4)                 | ATGGTTCAGCTAATC           | A0151                  | BNI3        | proprietary                             | CD152                       | 399907    | BioLegend |
|                     | CD61                           | AGGTTGGAGTAGACT           | A0372                  | VI-PL2      | proprietary                             | CD61                        | 399907    | BioLegend |
|                     | CD163                          | GCTTCTCCTCCTTA            | A0358                  | GHI/61      | proprietary                             | CD163.1                     | 399907    | BioLegend |
|                     | CD357 (GITR)                   | ACCTTTTCGACACTCG          | A0360                  | 108-17      | proprietary                             | CD357-GITR                  | 399907    | BioLegend |
|                     | CD137 (4-1BB)                  | CAGTAAGTTTCGGGAC          | A0355                  | 4B4-1       | proprietary                             | CD137                       | 399907    | BioLegend |
|                     | CD81 (TAPA-1)                  | GTATCCTTCTTGGC            | A0373                  | 5A6         | proprietary                             | CD81-TAPA-1                 | 399907    | BioLegend |
|                     | CD366 (Tim-3)                  | TGTCTACCCAACTT            | A0169                  | F38-2E2     | proprietary                             | CD366-Tim-3                 | 399907    | BioLegend |
|                     | CD57 Recombinant               | AACTCCCTATGGAGG           | A0168                  | QA17A04     | proprietary                             | CD57                        | 399907    | BioLegend |
|                     | CD278 (ICOS)                   | CGCGCACCACTAAA            | A0171                  | C398.4A     | proprietary                             | CD278-ICOS                  | 399907    | BioLegend |
|                     | CD95 (Fas)                     | CCAGCTCATTAGAGC           | A0156                  | DX2         | proprietary                             | CD95-Fas                    | 399907    | BioLegend |
|                     | CD80                           | ACGAATCAACTCTGTG          | A0005                  | 2D10        | proprietary                             | CD80.1                      | 399907    | BioLegend |
|                     | CD138 (Syndecan-1)             | ACTCTTTCGTTTACG           | A0055                  | MI15        | proprietary                             | CD138-Syndecan-1            | 399907    | BioLegend |
|                     | CD70                           | CGCGAACATAAGAGG           | A0027                  | 113-16      | proprietary                             | CD70.1                      | 399907    | BioLegend |
|                     | CD269 (BCMA)                   | CAGATGATCCACCAT           | A0056                  | 19F2        | proprietary                             | CD269-BCMA                  | 399907    | BioLegend |
|                     | IgM                            | TAGCGAGCCGCTATA           | A0136                  | MHM-88      | proprietary                             | IgM                         | 399907    | BioLegend |
|                     | CD59                           | AATTAGCCGTCGAGA           | A0361                  | p282 (H19)  | proprietary                             | CD59.1                      | 399907    | BioLegend |
|                     | CD194 (CCR4)                   | AGCTTACCTGCACGA           | A0071                  | L291H4      | proprietary                             | CD194-CCR4                  | 399907    | BioLegend |
|                     | CD275 (B7-H2, ICOSL)           | GTGCATTCACAGTA            | A0009                  | 2D3         | proprietary                             | CD275-B7-H2-ICOSL           | 399907    | BioLegend |
|                     | CD314 (NKG2D)                  | CGTGTITGTCCTCA            | A0165                  | 1D11        | proprietary                             | CD314-NKG2D                 | 399907    | BioLegend |
|                     | CD86                           | GTCTTTGTCAAGTCA           | A0006                  | IT2.2       | proprietary                             | CD86.1                      | 399907    | BioLegend |
|                     | Galectin-9                     | ACTCACTGGAGTCTC           | A0016                  | 9M1-3       | proprietary                             | N/A                         | 399907    | BioLegend |
|                     | CD195 (CCR5)                   | CCAAAGTAAGAGCGC           | A0141                  | J418F1      | proprietary                             | CD195-CCR5                  | 399907    | BioLegend |
|                     | CD1c                           | GAGCTACTTCACTCG           | A0160                  | L161        | proprietary                             | CD1c                        | 399907    | BioLegend |
|                     | CD28                           | TGAGAAGCACCTAA            | A0386                  | CD28.2      | proprietary                             | CD28.1                      | 399907    | BioLegend |
|                     | TSLPR (TSLP-R)                 | CAGTCCTCTCTGTCA           | A0387                  | 1D3         | proprietary                             | TSLPR                       | 399907    | BioLegend |
|                     | CD38                           | TGTACCCGCTTGTA            | A0389                  | HIT2        | proprietary                             | CD38.1                      | 399907    | BioLegend |
|                     | CD155 (PVR)                    | ATCACATCGTTGCGA           | A0023                  | SKIL.4      | proprietary                             | CD155-PVR                   | 399907    | BioLegend |
|                     | CD270 (HVEM, TR2)              | GTATAGAAACAGACC           | A0020                  | 122         | proprietary                             | CD270-HVEM-TR2              | 399907    | BioLegend |
|                     | CD178 (Fas-L)                  | CCGGTCCTCTGTATT           | A0177                  | NOK-1       | proprietary                             | CD178-FasL                  | 399907    | BioLegend |
|                     | CD127 (IL-7Rα)                 | GTGTGTTGTCCTATG           | A0390                  | A019D5      | proprietary                             | CD127-IL-7Rα                | 399907    | BioLegend |
|                     | CD7                            | TGGATTCCCGACTT            | A0066                  | CD7-6B7     | proprietary                             | CD7.1                       | 399907    | BioLegend |
|                     | CD117 (c-kit)                  | AGACTAATAGCTGAC           | A0061                  | 104D2       | proprietary                             | CD117-c-kit                 | 399907    | BioLegend |
|                     | CD10                           | CAGCCATTCATTAGG           | A0062                  | H110a       | proprietary                             | CD10                        | 399907    | BioLegend |
|                     | CD40                           | CTCAGATGGAGTATG           | A0031                  | 5C3         | proprietary                             | CD40.1                      | 399907    | BioLegend |
|                     | CD48                           | CTACGACGTAGAAGA           | A0029                  | BJ40        | proprietary                             | CD48.1                      | 399907    | BioLegend |
|                     | CD154                          | GCTAGATAGATGCAA           | A0032                  | 24-31       | proprietary                             | CD154                       | 399907    | BioLegend |
|                     | CD47                           | GCATTCTGTCAACCTA          | A0026                  | CC2C6       | proprietary                             | CD47.1                      | 399907    | BioLegend |
|                     | CD112 (Nectin-2)               | AACCTTCCGCTCTAAG          | A0024                  | TX31        | proprietary                             | CD112-Nectin-2              | 399907    | BioLegend |
|                     | CD52                           | CTTTGTACGACAAA            | A0033                  | HI186       | proprietary                             | CD52.1                      | 399907    | BioLegend |
|                     | CD71                           | CGGTGTTCTCATTAA           | A0394                  | CY1G4       | proprietary                             | CD71                        | 399907    | BioLegend |
|                     | CD22                           | GGGTTGTTGTCCTTG           | A0393                  | S-HCL-1     | proprietary                             | CD22.1                      | 399907    | BioLegend |
|                     | CD15 (SSEA-1)                  | TCACCGATACCTAGT           | A0392                  | W6D3        | proprietary                             | CD15-BEA-1                  | 399907    | BioLegend |

|                                 |                  |       |                   |             |                                |        |           |
|---------------------------------|------------------|-------|-------------------|-------------|--------------------------------|--------|-----------|
| XCR1                            | AAGACGCATGTCAAC  | A0208 | S15046E           | proprietary | XCR1.1                         | 399907 | BioLegend |
| CD26                            | GGTGGCTAGATAATG  | A0396 | BA5b              | proprietary | CD26                           | 399907 | BioLegend |
| B7-H4                           | TGTATGCTGCCTTG   | A0395 | MIH43             | proprietary | B7-H4                          | 399907 | BioLegend |
| CD31                            | ACCTTTATGCCACGG  | A0124 | WMS9              | proprietary | CD31                           | 399907 | BioLegend |
| CD14                            | TCTCAGACCTCCGTA  | A0081 | M5E2              | proprietary | CD14.2                         | 399907 | BioLegend |
| TIGIT (VSTM3)                   | TTGCTTACCGCCAGA  | A0089 | A15153G           | proprietary | TIGIT-VSTM3                    | 399907 | BioLegend |
| CD294 (CRTH2)                   | TGTTTACGAGAGCCC  | A0102 | BM16              | proprietary | CD294-CRTH2                    | 399907 | BioLegend |
| CD45                            | TCCTTGGCGATTAC   | A0048 | 2D1               | proprietary | CD45                           | 399907 | BioLegend |
| CD34                            | GCAGAAATCTCCCTT  | A0054 | 581               | proprietary | CD34.1                         | 399907 | BioLegend |
| CD244 (2B4)                     | TGCTTGGATGGTAG   | A0189 | C1.7              | proprietary | CD244-2B4                      | 399907 | BioLegend |
| CD185 (CXCR5)                   | AAATCAACCGTCGCC  | A0144 | J252D4            | proprietary | CD185-CXCR5                    | 399907 | BioLegend |
| CD18                            | TATTGGGACACTTCT  | A0385 | TS1/18            | proprietary | CD18                           | 399907 | BioLegend |
| CD119 (IFN- $\gamma$ R ? chain) | TGTGTATTCCTTGT   | A0219 | GIR-208           | proprietary | CD119-IFN- $\gamma$ -R-A-chain | 399907 | BioLegend |
| CD134 (OX40)                    | AACCCACCGTTGTTA  | A0158 | Ber-ACT35 (ACT35) | proprietary | CD134-OX40                     | 399907 | BioLegend |
| CD24                            | AGATTCCTTCGTGTT  | A0180 | ML5               | proprietary | CD24.1                         | 399907 | BioLegend |
| TCR $\gamma/\delta$             | CTTCCGATTCATTCA  | A0139 | B1                | proprietary | TCR- $\gamma$ -TCR-D           | 399907 | BioLegend |
| CD115 (CSF-1R)                  | AATCACGGCTCCTGT  | A0398 | 9-4D2-1E4         | proprietary | CD115-CSF-1R                   | 399907 | BioLegend |
| CD1d                            | TCGAGTCGCTTATCA  | A0164 | 51.1              | proprietary | CD1d                           | 399907 | BioLegend |
| CD192 (CCR2)                    | GAGTTCCTTACCTG   | A0242 | K036C2            | proprietary | CD192-CCR2                     | 399907 | BioLegend |
| CD105                           | ATCGTCGAGAGCTAG  | A0068 | 43A3              | proprietary | CD105                          | 399907 | BioLegend |
| CD144 (VE-Cadherin)             | TCCACTCATCTGTGA  | A0400 | BV9               | proprietary | CD144-VE-cadherin              | 399907 | BioLegend |
| CD193 (CCR3)                    | ACCAATCCCTTTCGTC | A0397 | 5E8               | proprietary | CD193-CCR3                     | 399907 | BioLegend |
| CD55                            | GCTCATTAACCCATTA | A0383 | JS11              | proprietary | CD55.1                         | 399907 | BioLegend |
| CD79b (I $\gamma$ B)            | ATTCTTCAACCGAAG  | A0187 | CB3-1             | proprietary | CD79b-I $\gamma$ -B            | 399907 | BioLegend |
| CD123                           | CTTCACTCTGTACGG  | A0064 | 6H6               | proprietary | CD123                          | 399907 | BioLegend |
| CD11c                           | TACGCCATAACTGT   | A0053 | S-HCL-3           | proprietary | CD11c                          | 399907 | BioLegend |
| CD54                            | CTGATAGACTTGAGT  | A0217 | HA58              | proprietary | CD54                           | 399907 | BioLegend |
| CD268 (BAFF-R)                  | CGAAGTCGATCCGTA  | A0215 | 11C1              | proprietary | CD268-BAFF-R                   | 399907 | BioLegend |
| TIM-4                           | CGTCATATAGTATGG  | A0428 | 9F4               | proprietary | Tim-4                          | 399907 | BioLegend |
| CD1a                            | GACTCGTGTGTGTTA  | A0402 | HI149             | proprietary | CD1a                           | 399907 | BioLegend |
| CD301 (CLEC10A)                 | ACCTAGAAATCAACA  | A0401 | H037G3            | proprietary | CD301-CLEC10A                  | 399907 | BioLegend |
| CD63                            | GAGATGCTGTGCAACT | A0404 | H5C6              | proprietary | CD63.1                         | 399907 | BioLegend |
| CD44                            | AATCCTTCCGAATGT  | A0125 | BJ18              | proprietary | CD44.1                         | 399907 | BioLegend |
| IgD                             | CAGTCTCCGTAGAGT  | A0384 | IA6-2             | proprietary | IgD                            | 399907 | BioLegend |
| CD72                            | CAGTCGGTAGAGTA   | A0419 | 3F3               | proprietary | CD72.1                         | 399907 | BioLegend |
| CD93                            | GCGCTACTTCCCTTGA | A0446 | VIMD2             | proprietary | CD93.1                         | 399907 | BioLegend |
| CD85g (ILT7)                    | TGTCAGTTCCTATGA  | A0409 | 17G10.2           | proprietary | CD85g-ILT7                     | 399907 | BioLegend |
| CD172a (SIRP $\alpha$ )         | CGTGTTTAACTTGAG  | A0408 | 15-414            | proprietary | CD172a-SIRP $\alpha$           | 399907 | BioLegend |
| CD284 (TLR4)                    | GCTTAGCTGTATCCG  | A0405 | HTA125            | proprietary | CD284-TLR4                     | 399907 | BioLegend |
| CD304 (Neuropilin-1)            | GGACTAAGTTTCGTT  | A0406 | 12C2              | proprietary | CD304-Neuropilin-1             | 399907 | BioLegend |
| CD36                            | TTCTTTGGCTTGCCA  | A0407 | 5-271             | proprietary | CD36.1                         | 399907 | BioLegend |
| CD102 (ICAM-2)                  | TGACCTTCCTCTCT   | A0244 | CBR-IC2/2         | proprietary | CD102                          | 399907 | BioLegend |
| TCR $\alpha/\beta$              | CGTAAAGTAGAGCGA  | A0224 | IP26              | proprietary | TCR- $\alpha$ -TCR- $\beta$    | 399907 | BioLegend |
| CD122 (IL-2R $\gamma$ )         | TCATTTCCCTCCGATT | A0246 | TU27              | proprietary | N/A                            | 399907 | BioLegend |
| CD83                            | CCACTCATTTCCGGT  | A0359 | HB15e             | proprietary | CD83.1                         | 399907 | BioLegend |
| CD267 (TACI)                    | AGTGATGGAGCGAAC  | A0247 | 1A1               | proprietary | CD267-TACI                     | 399907 | BioLegend |
| anti-human IgA                  | AAGATGTCGAGCAA   | A0186 | #N/A              | proprietary | N/A                            | 399907 | BioLegend |
| CD107a (LAMP-1)                 | CAGCCCAATCGAATA  | A0155 | HA43              | proprietary | CD107a-LAMP-1                  | 399907 | BioLegend |
| CD146                           | CCTTGATAACATCA   | A0134 | P1H12             | proprietary | CD146                          | 399907 | BioLegend |
| CD140b (PDGFR $\gamma$ )        | CAATGGTTCAGTGCC  | A0129 | 18A2              | proprietary | CD140b                         | 399907 | BioLegend |
| CD49a                           | ACTGATGGACTCAGA  | A0575 | TS2/7             | proprietary | CD49a                          | 399907 | BioLegend |
| $\alpha$                        | AACTTCTGTGGTAGC  | A0584 | 6B11              | proprietary | TCR-V-A-24-J-A-18-INKT cell    | 399907 | BioLegend |
| CD9                             | GAGTCACCAATCTGC  | A0579 | HI9a              | proprietary | CD9.1                          | 399907 | BioLegend |
| TCR V $\alpha$ 7.2              | TACGAGCAGTATTCA  | A0581 | 3C10              | proprietary | TCR-V-A-7.2                    | 399907 | BioLegend |
| TCR V $\gamma$ 9                | AAGTGATGGTATCTG  | A0583 | B3                | proprietary | TCR-V-G-9                      | 399907 | BioLegend |
| CD49d                           | CCATTCAACTCCGG   | A0576 | 9F10              | proprietary | CD49d                          | 399907 | BioLegend |
| C5L2                            | ACAATTTGCTCTGCCA | A0572 | 1D9-M12           | proprietary | C5L2                           | 399907 | BioLegend |
| CD338 (ABCG2)                   | TAAGACTTGGCCGTC  | A0569 | 5D3               | proprietary | CD338-ABCG2                    | 399907 | BioLegend |
| CD73 (Ecto-5'-nucleotidase)     | CAGTTCCTCAGTTCG  | A0577 | AD2               | proprietary | CD73-Ecto-5'-nucleotidase      | 399907 | BioLegend |
| anti-human CD79a (I $\gamma$ 7) | CTTATCACCCGCTTT  | A0578 | #N/A              | proprietary | N/A                            | 399907 | BioLegend |
| CD158b (KIR2DL2/L3, NKAT2)      | GACCCGTAGTTTGA   | A0592 | DX27              | proprietary | CD158b-KIR2DL2-KIR2DL3-NKAT2   | 399907 | BioLegend |
| CD226 (DNAM-1)                  | AGACCAACTCATTCA  | A0805 | TX25              | proprietary | CD226-DNAM-1.1                 | 399907 | BioLegend |
| CD186 (CXCR6)                   | GACAGTCGATGCAAC  | A0804 | K041E5            | proprietary | CD186-CXCR6                    | 399907 | BioLegend |
| CD158f (KIR2DL5)                | AAAGTGATGCCACTG  | A0600 | UP-R1             | proprietary | CD158f-KIR2DL5                 | 399907 | BioLegend |
| CD158e1 (KIR3DL1, NKB1)         | GGACGCTTCTCTTGA  | A0599 | DX9               | proprietary | CD158e1-KIR3DL1-NKB1           | 399907 | BioLegend |
| CD140a (PDGFR $\gamma$ )        | ATGCGCCSAGAATTA  | A0128 | 16A1              | proprietary | CD140a                         | 399907 | BioLegend |
| CD354 (TREM-1)                  | TAGCCGTTTCCCTTGG | A0586 | TREM-26           | proprietary | N/A                            | 399907 | BioLegend |
| TCR V $\delta$ 2                | TCAGTCAGATGGTAT  | A0582 | B6                | proprietary | TCR-V-D-2                      | 399907 | BioLegend |
| CD202b (Tie2/Tek)               | CGATCCCTTACCTAT  | A0588 | 33.1 (Ab33)       | proprietary | CD202b-Tie2-Tek                | 399907 | BioLegend |
| CD96 (TACTILE)                  | TGGCCTATAAATGGT  | A0175 | NK92.39           | proprietary | CD96-TACTILE                   | 399907 | BioLegend |
| CD158 (KIR2DL1/S1/S3/S5)        | TATCAACCAACGCTT  | A0420 | HP-MA4            | proprietary | KIR2DS3-KIR2DS5                | 399907 | BioLegend |
| CD337 (NKp30)                   | AAAGTCACTCTGCCG  | A0801 | P30-15            | proprietary | CD337-NKp30                    | 399907 | BioLegend |
| CD253 (Trail)                   | GCCATTCCCTGCCTAA | A0803 | RIK-2             | proprietary | CD253-TRAIL                    | 399907 | BioLegend |
| CD319 (CRACC)                   | AGTATGCGATGTCTT  | A0830 | 162.1             | proprietary | CD319-CRACC                    | 399907 | BioLegend |
| CD305 (LAIR1)                   | ATTTCCATTCCCTGT  | A0590 | NKTA255           | proprietary | CD305-LAIR1                    | 399907 | BioLegend |
| CD325 (N-Cadherin)              | CCTTCCCTTCTCTCT  | A0433 | 8C11              | proprietary | CD325-N-Cadherin               | 399907 | BioLegend |
| mast cell tryptase              | ACTGATAGACCCGCT  | A0580 | AA1               | proprietary | N/A                            | 399907 | BioLegend |
| CLEC12A                         | CATTAGAGTCTGCCA  | A0853 | 50C1              | proprietary | CD371-CLEC12A                  | 399907 | BioLegend |
| CD90 (Thy1)                     | GCATTGTAGGATTCA  | A0060 | 5E10              | proprietary | CD90-Thy1                      | 399907 | BioLegend |
| CD273 (B7-DC, PD-L2)            | TCAACCGTTGGCTAG  | A0008 | 24F.10C12         | proprietary | CD273-B7-DC-PD-L2              | 399907 | BioLegend |
| CD272 (BTLA)                    | GTTATTGGACTAAGG  | A0170 | MIH26             | proprietary | CD272-BTLA                     | 399907 | BioLegend |
| CD5                             | CATTAACGGGATGCC  | A0138 | UCHT2             | proprietary | CD5.1                          | 399907 | BioLegend |
| CD23                            | TCTGTATAACCGCTCT | A0897 | EBVCS-5           | proprietary | CD23                           | 399907 | BioLegend |
| CD85j (ILT2)                    | CCTTGTGAGGCTATG  | A0896 | GHI/75            | proprietary | CD85j-ILT2                     | 399907 | BioLegend |
| CD94                            | CTTTCCGGTCTCAC   | A0867 | DX22              | proprietary | CD94                           | 399907 | BioLegend |
| CD27                            | GCACCTCTGCATGTA  | A0154 | O323              | proprietary | CD27.1                         | 399907 | BioLegend |
| CD328 (Siglec-7)                | CTTAGCATTCAGTG   | A0902 | 6-434             | proprietary | CD328-Siglec-7                 | 399907 | BioLegend |
| CD82                            | TCCCACCTCCGCTTT  | A0920 | ASL-24            | proprietary | N/A                            | 399907 | BioLegend |
| CD16                            | AAGTTCACCTTTTGC  | A0083 | 3G8               | proprietary | CD16                           | 399907 | BioLegend |
| MERTK                           | TCCTGCATGATCCCA  | A0423 | 590H11G1E3        | proprietary | MERTK.1                        | 399907 | BioLegend |



|       |                       |                 |       |                |             |                     |            |               |
|-------|-----------------------|-----------------|-------|----------------|-------------|---------------------|------------|---------------|
|       | IgG Fc                | CTGGAGCGATTAGAA | A0375 | M1310G05       | proprietary | IgG-Fc              | 399907     | BioLegend     |
|       | FcεR1α                | CTCGTTTCCGTATCG | A0352 | AER-37 (CRA-1) | proprietary | FcεR1α              | 399907     | BioLegend     |
|       | CD274 (B7-H1, PD-L1)  | GTTGTCGACAAATAC | A0007 | 29E.2A3        | proprietary | CD274-B7-H1-PD-L1   | 399907     | BioLegend     |
|       | CD254 (TRANCE, RANKL) | TCCGTGTTAGTTTGT | A0356 | MIH24          | proprietary | CD254-TRANCE-RANKL  | 399907     | BioLegend     |
|       | CX3CR1                | AGTATCGTCTCTGGG | A0179 | K0124E1        | proprietary | CX3CR1.1            | 399907     | BioLegend     |
|       | CD137L (4-1BB Ligand) | ATTGCGCTTACGCAA | A0022 | 5F4            | proprietary | CD137L-4-1BB-Ligand | 399907     | BioLegend     |
|       | Siglec-8              | CTTCTCCTCAGCAAT | A0199 | 7C9            | proprietary | N/A                 | 399907     | BioLegend     |
|       | CD45                  | 89              | Y     | HI30           | 1.5         |                     | 304002     | BioLegend     |
|       | EpcAM                 | 115             | In    | 9C4            | 1.5         |                     | 324202     | BioLegend     |
|       | CD7                   | 139             | La    | M-T701         | 1.5         |                     | 555359     | BD Bioscience |
|       | CD15                  | 140             | Ce    | W6D3           | 1.5         |                     | 323002     | BioLegend     |
|       | CD3                   | 141             | Pr    | UCHT1          | 0.4         |                     | 300402     | BioLegend     |
|       | CD19                  | 142             | Nd    | HIB19          | 0.4         |                     | 302202     | BioLegend     |
|       | CD163                 | 144             | Nd    | GHI61          | 3           |                     | 333602     | BioLegend     |
|       | CD4                   | 145             | Nd    | RPA-T4         | 0.4         |                     | 14-0049-82 | Thermo        |
|       | CD8a                  | 146             | Nd    | RPA-T8         | 0.4         |                     | 301002     | BioLegend     |
|       | CD11c                 | 147             | Sm    | BU15           | 0.4         |                     | MA1-82142  | Thermo        |
|       | CD14                  | 148             | Nd    | M5E2           | 1.5         |                     | 301802     | BioLegend     |
|       | CD127                 | 149             | Sm    | A019D5         | 1.5         |                     | 351302     | BioLegend     |
|       | CD123                 | 151             | Eu    | 6H6            | 0.8         |                     | 14-1239-82 | Thermo        |
|       | gdTCR                 | 152             | Sm    | 5A6.E9         | 0.4         |                     | HB-9772    | ATCC          |
|       | CD45RA                | 153             | Eu    | HI100          | 1.5         |                     | 304102     | BioLegend     |
|       | TIM3                  | 154             | Sm    | F38-2E2        | 3           |                     | 345002     | BioLegend     |
|       | TIGIT                 | 155             | Gd    | A15153G        | 1.5         |                     | 372720     | BioLegend     |
|       | PD-L1                 | 156             | Gd    | 29E.2A3        | 1.5         |                     | 329702     | BioLegend     |
| CytoF | Integrin α4           | 157             | Gd    | 9F10           | 1.5         |                     | 304302     | BioLegend     |
|       | CD27                  | 158             | Gd    | O323           | 0.4         |                     | 302802     | BioLegend     |
|       | CD137_4-1BB           | 159             | Tb    | 4B4-1          | 1.5         |                     | 14-9056-82 | Thermo        |
|       | Tbet                  | 160             | Gd    | 4B10           | 0.4         |                     | 14-5825-82 | Thermo        |
|       | CTLA-4                | 161             | Dy    | 14D3           | 0.4         |                     | 14-1529-82 | Thermo        |
|       | FOXP3                 | 162             | Dy    | PCH101         | 0.8         |                     | 14-4776-82 | Thermo        |
|       | CD31                  | 163             | Dy    | WM59           | 0.8         |                     | 303102     | BioLegend     |
|       | Integrin b7           | 165             | Ho    | FIB504         | 1.5         |                     | 321202     | BioLegend     |
|       | CD141_BDCA3           | 166             | Er    | M80            | 0.8         |                     | 344102     | BioLegend     |
|       | CCR7                  | 167             | Er    | GO43H7         | 1.5         |                     | 353202     | BioLegend     |
|       | Ki-67                 | 168             | Er    | Ki-67          | 0.8         |                     | 350502     | BioLegend     |
|       | CD25                  | 169             | Tm    | MA-251         | 0.4         |                     | 356102     | BioLegend     |
|       | CD1c_BDCA1            | 170             | Er    | L161           | 0.8         |                     | 331502     | BioLegend     |
|       | CD38                  | 172             | Yb    | HIT2           | 0.4         |                     | 303502     | BioLegend     |
|       | ICOS                  | 173             | Yb    | C398.4A        | 0.8         |                     | 313502     | BioLegend     |
|       | HLA-DR                | 174             | Yb    | L243           | 1.5         |                     | 307665     | BioLegend     |
|       | PD-1                  | 175             | Lu    | EH12.2H7       | 1.5         |                     | 329902     | BioLegend     |
|       | CD56                  | 176             | Yb    | NCAM16.2       | 0.8         |                     | 559043     | BD Bioscience |
|       | CD16                  | 209             | Bl    | 3G8            | 0.4         |                     | 302049     | BioLegend     |
|       | COL1A2                | 488             |       | 432721-T1      |             |                     |            | ACD bio-techn |
|       | MS4A1                 | 550             |       | 426771-T2      |             |                     |            | ACD bio-techn |
|       | FLT3                  | 650             |       | 419491-T3      |             |                     |            | ACD bio-techn |
|       | ITGα4                 | 488             |       | 408591-T4      |             |                     |            | ACD bio-techn |
|       | MZB1                  | 550             |       | 579241-T5      |             |                     |            | ACD bio-techn |
|       | C1QA                  | 650             |       | 485451-T6      |             |                     |            | ACD bio-techn |
|       | ITGβ7                 | 488             |       | 605941-T7      |             |                     |            | ACD bio-techn |
|       | MA6CAM-1              | 550             |       | 404711-T8      |             |                     |            | ACD bio-techn |
|       | KRT8                  | 650             |       | 310261-T9      |             |                     |            | ACD bio-techn |
|       | PECAM-1               | 488             |       | 487381-T10     |             |                     |            | ACD bio-techn |
|       | CD3E                  | 650             |       | 553971-T11     |             |                     |            | ACD bio-techn |
|       | PTPRC                 | 650             |       | 601991-T12     |             |                     |            | ACD bio-techn |
|       | HLA-A                 | AF750           | BX004 | EP1395Y        | 1:200       |                     | ab216653   | Abcam         |
|       | CD34                  | ATTO550         | BX020 | QBEND/10       | 1:150       |                     | MA1-10205  | ThermoFisher  |
|       | CD4                   | Cy5             | BX003 | EPR6855        | 1:200       |                     | ab133616   | Abcam         |
|       | CD20                  | AF750           | BX007 | L26            | 1:200       |                     | 14-0202-82 | ThermoFisher  |
|       | CD14                  | ATTO550         | BX037 | EPR3653        | 1:500       |                     | ab133335   | Abcam         |
|       | CD68                  | Cy5             | BX015 | KP1            | 1:200       |                     | MA5-13324  | ThermoFisher  |
|       | Vimentin              | AF750           | BX022 | 091D3          | 1:200       |                     | 677802     | BioLegend     |
|       | CD8                   | ATTO550         | BX026 | C8/144B        | 1:200       |                     | 372908     | BioLegend     |
|       | CD11c                 | Cy5             | BX024 | 118/A5         | 1:200       |                     | 14-9761-82 | ThermoFisher  |
|       | CD31                  | AF750           | BX001 | EP3095         | 1:100       |                     | ab134168   | Abcam         |
|       | E-Cadherin            | ATTO550         | BX014 | 4A2C7          | 1:300       |                     | 33-4000    | ThermoFisher  |
|       | CD45                  | Cy5             | BX021 | D9M81          | 1:300       |                     | #13917     | CST           |
|       | SMA                   | AF750           | BX013 | 1A4            | 1:200       |                     | ab7817     | Abcam         |
|       | CD45RO                | ATTO550         | BX017 | UCHL1          | 1:200       |                     | 304202     | BioLegend     |
|       | CD3e                  | Cy5             | BX045 | EP449E         | 1:200       |                     | ab52959    | Abcam         |
|       | Pan-cytokeratin       | AF750           | BX019 | AE1/AE3        | 1:200       |                     | 914204     | BioLegend     |
|       | CD44                  | ATTO550         | BX005 | 156-3C11       | 1:400       |                     | #3570      | CST           |
|       | HLA-DR                | Cy5             | BX033 | EPR3692        | 1:200       |                     | ab92511    | Abcam         |
|       | Granzyme B            | ATTO550         | BX041 | D6E9W          | 1:50        |                     | #46890     | CST           |
|       | Collagen IV           | Cy5             | BX042 | EPR209660      | 1:200       |                     | ab214417   | Abcam         |
|       | Podoplanin            | ATTO550         | BX023 | NC-08          | 1:200       |                     | 337002     | BioLegend     |
|       | FOXP3                 | AF647           | BX031 | 259D/C7        | 1:100       |                     | 560044     | BD Pharmigen  |
|       | Ki67                  | ATTO550         | BX047 | B56            | 1:300       |                     | 556003     | BD Pharmigen  |
|       | CD163                 | AF647           | BX016 | D6U1J          | 1:50        |                     | #93498     | CST           |
|       | CD19                  | ATTO550         | BX028 | RM332          | 1:50        |                     | 31-1219-00 | RevMab        |
|       | CD11b                 | Cy5             | BX030 | EP1345Y        | 1:50        |                     | ab52478    | Abcam         |
|       | CD21                  | ATTO550         | BX032 | EP3093         | 1:400       |                     | ab75985    | Abcam         |
|       | CD57                  | AF647           | BX049 | HNK-1          | 1:100       |                     | 359610     | BioLegend     |
|       | dsDNA                 | 89              | Y     | 3519 DNA       | 0.2         |                     | ab27156    | Abcam         |
|       | E-Cadherin            | 113             | In    | 36             | 0.5         |                     | ab287971   | Abcam         |
|       | Histone H3            | 115             | In    | D1H2           | 1:100       |                     | 711501-100 | lonpath       |
|       | FoxP3-AF488           | 141             | Pr    | 236A/E7        | 2           |                     | 561181     | BD Pharmigen  |
|       | anti-488              | 141             | Pr    | polyclonal     | 3           |                     | #A-11094   | ThermoFisher  |
|       | CD163                 | 142             | Nd    | EPR14643-36    | 0.6         |                     | ab215976   | Abcam         |
|       | CD4                   | 143             | Nd    | EPR6855        | 1:100       |                     | 714301-100 | lonpath       |

|                    |                  |     |    |             |       |            |            |
|--------------------|------------------|-----|----|-------------|-------|------------|------------|
|                    | CD11c            | 144 | Nd | EP1347Y     | 1:100 | 714401-100 | lonpath    |
|                    | CD14             | 145 | Nd | D7A2T       | 0.6   | #43878     | CST        |
|                    | CD16             | 146 | Nd | D1N9L       | 0.6   | #72204     | CST        |
|                    | LAG3             | 147 | Sm | 17B4        | 5     | NBP1-97657 | Novus      |
|                    | PD-1             | 148 | Nd | D4W2J       | 1:100 | 714801-100 | lonpath    |
|                    | PD-L1            | 149 | Sm | E1L3N       | 1:100 | 714902-100 | lonpath    |
|                    | Granzyme B       | 150 | Nd | D6E9W       | 1:100 | 715002-100 | lonpath    |
|                    | CD56             | 151 | Eu | MRQ-42      | 1:100 | 715101-100 | lonpath    |
|                    | CD31             | 152 | Sm | EP3095      | 1:100 | 715201-100 | lonpath    |
|                    | Ki67             | 153 | Eu | D2H10       | 0.15  | #44092     | CST        |
|                    | CD138            | 154 | Sm | EPR6454     | 5     | ab2261108  | Abcam      |
|                    | CD117            | 155 | Gd | YR145       | 1:100 | 715501-100 | lonpath    |
| MIB1               | CD68             | 156 | Gd | D4B9C       | 1:100 | 715601-100 | lonpath    |
|                    | CD103            | 157 | Gd | EPR4166(2)  | 15    | ab271889   | Abcam      |
|                    | CD8              | 158 | Gd | C8/144B     | 1:100 | 715801-100 | lonpath    |
|                    | CD3              | 159 | Tb | D7A6E       | 1:100 | 715903-100 | lonpath    |
|                    | Tbet             | 160 | Gd | D6N8B       | 5     | #27112     | CST        |
|                    | CD45RO           | 161 | Dy | UCHL1       | 1:100 | 716101-100 | lonpath    |
|                    | TIM3             | 162 | Dy | EPR22241    | 1:100 | 716201-100 | lonpath    |
|                    | Vimentin         | 163 | Dy | D21H3       | 1:100 | 716301-100 | lonpath    |
|                    | CD27             | 164 | Dy | EPR8569     | 5     | ab256583   | Abcam      |
|                    | Pan-Keratin      | 165 | Ho | AE1/AE3     | 1:100 | 716501-100 | lonpath    |
|                    | aSMA             | 166 | Er | SP171       | 2.5   | ab242395   | Abcam      |
|                    | CD20             | 167 | Er | L26         | 1:100 | 716701-100 | Abcam      |
|                    | CD11b            | 168 | Er | D6X1N       | 0.5   | ab187537   | Abcam      |
|                    | BDCA3 (CD141)    | 169 | Tm | E7Y9P       | 10    | #34149     | CST        |
|                    | CD21             | 170 | Er | EP3093      | 1:100 | 717001-100 | lonpath    |
|                    | IDO1             | 171 | Yb | EPR20374    | 1:100 | 717101-100 | lonpath    |
|                    | HLA-DR           | 172 | Yb | EPR3692     | 1:100 | 717201-100 | lonpath    |
|                    | EpCAM            | 173 | Yb | D9S3P       | 0.5   | #55725     | CST        |
|                    | CD45             | 175 | Yb | 2B11/PD7/26 | 1:100 | 717501-100 | lonpath    |
|                    | HLA Class 1, ABC | 176 | Yb | EMR8-5      | 1:100 | 717602-100 | lonpath    |
| CosMx              | AATK             |     |    |             |       |            | Nanostring |
| SMI 960-plex panel | ABL1             |     |    |             |       |            | Nanostring |
|                    | ABL2             |     |    |             |       |            | Nanostring |
|                    | ACE              |     |    |             |       |            | Nanostring |
|                    | ACE2             |     |    |             |       |            | Nanostring |
|                    | ACKR1            |     |    |             |       |            | Nanostring |
|                    | ACKR3            |     |    |             |       |            | Nanostring |
|                    | ACKR4            |     |    |             |       |            | Nanostring |
|                    | ACTA2            |     |    |             |       |            | Nanostring |
|                    | ACTG2            |     |    |             |       |            | Nanostring |
|                    | ACVR1            |     |    |             |       |            | Nanostring |
|                    | ACVR1B           |     |    |             |       |            | Nanostring |
|                    | ACVR2A           |     |    |             |       |            | Nanostring |
|                    | ACVRL1           |     |    |             |       |            | Nanostring |
|                    | ADGRA2           |     |    |             |       |            | Nanostring |
|                    | ADGRA3           |     |    |             |       |            | Nanostring |
|                    | ADGRB2           |     |    |             |       |            | Nanostring |
|                    | ADGRB3           |     |    |             |       |            | Nanostring |
|                    | ADGRD1           |     |    |             |       |            | Nanostring |
|                    | ADGRE1           |     |    |             |       |            | Nanostring |
|                    | ADGRE2           |     |    |             |       |            | Nanostring |
|                    | ADGRES           |     |    |             |       |            | Nanostring |
|                    | ADGRF1           |     |    |             |       |            | Nanostring |
|                    | ADGRF3           |     |    |             |       |            | Nanostring |
|                    | ADGRF4           |     |    |             |       |            | Nanostring |
|                    | ADGRF5           |     |    |             |       |            | Nanostring |
|                    | ADGRG1           |     |    |             |       |            | Nanostring |
|                    | ADGRG2           |     |    |             |       |            | Nanostring |
|                    | ADGRG3           |     |    |             |       |            | Nanostring |
|                    | ADGRG5           |     |    |             |       |            | Nanostring |
|                    | ADGRG6           |     |    |             |       |            | Nanostring |
|                    | ADGRL1           |     |    |             |       |            | Nanostring |
|                    | ADGRL2           |     |    |             |       |            | Nanostring |
|                    | ADGRL4           |     |    |             |       |            | Nanostring |
|                    | ADGRV1           |     |    |             |       |            | Nanostring |
|                    | ADIPOQ           |     |    |             |       |            | Nanostring |
|                    | ADIRF            |     |    |             |       |            | Nanostring |
|                    | ADM2             |     |    |             |       |            | Nanostring |
|                    | ADORA2A          |     |    |             |       |            | Nanostring |
|                    | AGR2             |     |    |             |       |            | Nanostring |
|                    | AH1              |     |    |             |       |            | Nanostring |
|                    | AHR              |     |    |             |       |            | Nanostring |
|                    | AKT1             |     |    |             |       |            | Nanostring |
|                    | ALCAM            |     |    |             |       |            | Nanostring |
|                    | ANGPT1           |     |    |             |       |            | Nanostring |
|                    | ANGPT2           |     |    |             |       |            | Nanostring |
|                    | ANGPT4           |     |    |             |       |            | Nanostring |
|                    | ANGPTL1          |     |    |             |       |            | Nanostring |
|                    | ANXA1            |     |    |             |       |            | Nanostring |
|                    | ANXA2            |     |    |             |       |            | Nanostring |
|                    | ANXA4            |     |    |             |       |            | Nanostring |
|                    | APOA1            |     |    |             |       |            | Nanostring |
|                    | APOB             |     |    |             |       |            | Nanostring |
|                    | APOD             |     |    |             |       |            | Nanostring |
|                    | APP              |     |    |             |       |            | Nanostring |
|                    | AQP3             |     |    |             |       |            | Nanostring |
|                    | AR               |     |    |             |       |            | Nanostring |
|                    | AREG             |     |    |             |       |            | Nanostring |
|                    | ARF1             |     |    |             |       |            | Nanostring |

|          |            |
|----------|------------|
| ARG1     | Nanostring |
| ARHGDI8  | Nanostring |
| ARTN     | Nanostring |
| ATF3     | Nanostring |
| ATG10    | Nanostring |
| ATG12    | Nanostring |
| ATG5     | Nanostring |
| ATM      | Nanostring |
| ATR      | Nanostring |
| AXL      | Nanostring |
| AZGP1    | Nanostring |
| AZU1     | Nanostring |
| B2M      | Nanostring |
| B3GNT7   | Nanostring |
| BAG3     | Nanostring |
| BATF3    | Nanostring |
| BAX      | Nanostring |
| BCL2     | Nanostring |
| BCL2L1   | Nanostring |
| BECN1    | Nanostring |
| BEST1    | Nanostring |
| BGN      | Nanostring |
| BID      | Nanostring |
| BIRC5    | Nanostring |
| BMP1     | Nanostring |
| BMP2     | Nanostring |
| BMP3     | Nanostring |
| BMP4     | Nanostring |
| BMP5     | Nanostring |
| BMP6     | Nanostring |
| BMP7     | Nanostring |
| BMPR1A   | Nanostring |
| BMPR2    | Nanostring |
| BMX      | Nanostring |
| BRCA1    | Nanostring |
| BST1     | Nanostring |
| BST2     | Nanostring |
| BTG1     | Nanostring |
| BTK      | Nanostring |
| C11orf96 | Nanostring |
| C1QA     | Nanostring |
| C1QB     | Nanostring |
| C1QC     | Nanostring |
| CSAR2    | Nanostring |
| C9orf16  | Nanostring |
| CALB1    | Nanostring |
| CALD1    | Nanostring |
| CALM1    | Nanostring |
| CALM2    | Nanostring |
| CALM3    | Nanostring |
| CAMP     | Nanostring |
| CASP3    | Nanostring |
| CASP8    | Nanostring |
| CASR     | Nanostring |
| CAV1     | Nanostring |
| CCL11    | Nanostring |
| CCL13    | Nanostring |
| CCL15    | Nanostring |
| CCL18    | Nanostring |
| CCL19    | Nanostring |
| CCL2     | Nanostring |
| CCL20    | Nanostring |
| CCL21    | Nanostring |
| CCL23    | Nanostring |
| CCL26    | Nanostring |
| CCL28    | Nanostring |
| CCL3     | Nanostring |
| CCL3L3   | Nanostring |
| CCL4     | Nanostring |
| CCL4L2   | Nanostring |
| CCL5     | Nanostring |
| CCL7     | Nanostring |
| CCL8     | Nanostring |
| CCND1    | Nanostring |
| CCR1     | Nanostring |
| CCR10    | Nanostring |
| CCR2     | Nanostring |
| CCR5     | Nanostring |
| CCR7     | Nanostring |
| CCRL2    | Nanostring |
| CD14     | Nanostring |
| CD163    | Nanostring |
| CD164    | Nanostring |
| CD19     | Nanostring |
| CD2      | Nanostring |
| CD209    | Nanostring |
| CD24     | Nanostring |
| CD27     | Nanostring |
| CD274    | Nanostring |
| CD276    | Nanostring |
| CD28     | Nanostring |

|         |            |
|---------|------------|
| CD300A  | Nanostring |
| CD33    | Nanostring |
| CD34    | Nanostring |
| CD36    | Nanostring |
| CD37    | Nanostring |
| CD38    | Nanostring |
| CD3D    | Nanostring |
| CD3E    | Nanostring |
| CD3G    | Nanostring |
| CD4     | Nanostring |
| CD40    | Nanostring |
| CD40LG  | Nanostring |
| CD44    | Nanostring |
| CD47    | Nanostring |
| CD48    | Nanostring |
| CD52    | Nanostring |
| CD53    | Nanostring |
| CD55    | Nanostring |
| CD58    | Nanostring |
| CD59    | Nanostring |
| CD5L    | Nanostring |
| CD63    | Nanostring |
| CD68    | Nanostring |
| CD69    | Nanostring |
| CD70    | Nanostring |
| CD74    | Nanostring |
| CD79A   | Nanostring |
| CD80    | Nanostring |
| CD81    | Nanostring |
| CD83    | Nanostring |
| CD84    | Nanostring |
| CD86    | Nanostring |
| CD8A    | Nanostring |
| CD8B    | Nanostring |
| CD9     | Nanostring |
| CDH1    | Nanostring |
| CDH11   | Nanostring |
| CDH5    | Nanostring |
| CDKN1A  | Nanostring |
| CDKN3   | Nanostring |
| CEACAM1 | Nanostring |
| CEACAM6 | Nanostring |
| CELSR1  | Nanostring |
| CELSR2  | Nanostring |
| CENPF   | Nanostring |
| CFD     | Nanostring |
| CFLAR   | Nanostring |
| CHEK1   | Nanostring |
| CHEK2   | Nanostring |
| CHGA    | Nanostring |
| CHI3L1  | Nanostring |
| CIDEA   | Nanostring |
| CIITA   | Nanostring |
| CLCF1   | Nanostring |
| CLDN4   | Nanostring |
| CLEC10A | Nanostring |
| CLEC12A | Nanostring |
| CLEC14A | Nanostring |
| CLEC1A  | Nanostring |
| CLEC2B  | Nanostring |
| CLEC2D  | Nanostring |
| CLEC4A  | Nanostring |
| CLEC4D  | Nanostring |
| CLEC4E  | Nanostring |
| CLECSA  | Nanostring |
| CLEC7A  | Nanostring |
| CLOCK   | Nanostring |
| CLU     | Nanostring |
| CMKLR1  | Nanostring |
| CNTRF   | Nanostring |
| COL11A1 | Nanostring |
| COL12A1 | Nanostring |
| COL14A1 | Nanostring |
| COL15A1 | Nanostring |
| COL16A1 | Nanostring |
| COL17A1 | Nanostring |
| COL18A1 | Nanostring |
| COL1A1  | Nanostring |
| COL1A2  | Nanostring |
| COL21A1 | Nanostring |
| COL27A1 | Nanostring |
| COL3A1  | Nanostring |
| COL4A1  | Nanostring |
| COL4A2  | Nanostring |
| COL4A5  | Nanostring |
| COL5A1  | Nanostring |
| COL5A2  | Nanostring |
| COL5A3  | Nanostring |
| COL6A1  | Nanostring |
| COL6A2  | Nanostring |
| COL6A3  | Nanostring |

|         |            |
|---------|------------|
| COL8A1  | Nanostring |
| COL9A1  | Nanostring |
| COL9A2  | Nanostring |
| COL9A3  | Nanostring |
| COTL1   | Nanostring |
| CPA3    | Nanostring |
| CPB1    | Nanostring |
| CRIP1   | Nanostring |
| CRP     | Nanostring |
| CRYAB   | Nanostring |
| CSF1    | Nanostring |
| CSF1R   | Nanostring |
| CSF2    | Nanostring |
| CSF2RA  | Nanostring |
| CSF2RB  | Nanostring |
| CSF3    | Nanostring |
| CSF3R   | Nanostring |
| CSHL1   | Nanostring |
| CSK     | Nanostring |
| CST7    | Nanostring |
| CTLA4   | Nanostring |
| CTNNA1  | Nanostring |
| CTSG    | Nanostring |
| CTSW    | Nanostring |
| CUZD1   | Nanostring |
| CX3CL1  | Nanostring |
| CX3CR1  | Nanostring |
| CXCL1   | Nanostring |
| CXCL10  | Nanostring |
| CXCL12  | Nanostring |
| CXCL14  | Nanostring |
| CXCL16  | Nanostring |
| CXCL17  | Nanostring |
| CXCL2   | Nanostring |
| CXCL3   | Nanostring |
| CXCL5   | Nanostring |
| CXCL6   | Nanostring |
| CXCL8   | Nanostring |
| CXCL9   | Nanostring |
| CXCR1   | Nanostring |
| CXCR2   | Nanostring |
| CXCR3   | Nanostring |
| CXCR4   | Nanostring |
| CXCR5   | Nanostring |
| CXCR6   | Nanostring |
| CYP19A1 | Nanostring |
| CYP11B1 | Nanostring |
| CYSTM1  | Nanostring |
| CYTOR   | Nanostring |
| DCN     | Nanostring |
| DDC     | Nanostring |
| DDIT3   | Nanostring |
| DDR1    | Nanostring |
| DDR2    | Nanostring |
| DDX58   | Nanostring |
| DHR52   | Nanostring |
| DLL1    | Nanostring |
| DNMT1   | Nanostring |
| DNMT1   | Nanostring |
| DNMT3A  | Nanostring |
| DNTT    | Nanostring |
| DPP4    | Nanostring |
| DST     | Nanostring |
| DUSP1   | Nanostring |
| DUSP2   | Nanostring |
| DUSP4   | Nanostring |
| DUSP5   | Nanostring |
| DUSP6   | Nanostring |
| EFNA1   | Nanostring |
| EFNA4   | Nanostring |
| EFNA5   | Nanostring |
| EFNB1   | Nanostring |
| EFNB2   | Nanostring |
| EFNB3   | Nanostring |
| EGF     | Nanostring |
| EGFR    | Nanostring |
| EIF5A   | Nanostring |
| ELANE   | Nanostring |
| EMP3    | Nanostring |
| ENG     | Nanostring |
| ENTPD1  | Nanostring |
| EOMES   | Nanostring |
| EPCAM   | Nanostring |
| EPHA2   | Nanostring |
| EPHA3   | Nanostring |
| EPHA4   | Nanostring |
| EPHA7   | Nanostring |
| EPHB2   | Nanostring |
| EPHB3   | Nanostring |
| EPHB4   | Nanostring |
| EPHB6   | Nanostring |

|         |            |
|---------|------------|
| EPOR    | Nanostring |
| ERBB2   | Nanostring |
| ERBB3   | Nanostring |
| ESAM    | Nanostring |
| ESR1    | Nanostring |
| ETS1    | Nanostring |
| ETV4    | Nanostring |
| ETV5    | Nanostring |
| EZH2    | Nanostring |
| EZR     | Nanostring |
| FABP4   | Nanostring |
| FABP5   | Nanostring |
| FAS     | Nanostring |
| FASLG   | Nanostring |
| FASN    | Nanostring |
| FCER1G  | Nanostring |
| FCGBP   | Nanostring |
| FCGR3A  | Nanostring |
| FCRLA   | Nanostring |
| FES     | Nanostring |
| FFAR2   | Nanostring |
| FFAR3   | Nanostring |
| FFAR4   | Nanostring |
| FGF1    | Nanostring |
| FGF12   | Nanostring |
| FGF13   | Nanostring |
| FGF18   | Nanostring |
| FGF2    | Nanostring |
| FGF7    | Nanostring |
| FGF9    | Nanostring |
| FGFR1   | Nanostring |
| FGFR2   | Nanostring |
| FGFR3   | Nanostring |
| FGG     | Nanostring |
| FGR     | Nanostring |
| FKBP11  | Nanostring |
| FLT1    | Nanostring |
| FLT3LG  | Nanostring |
| FN1     | Nanostring |
| FOS     | Nanostring |
| FOXF1   | Nanostring |
| FOXP3   | Nanostring |
| FPR1    | Nanostring |
| FYB1    | Nanostring |
| FYN     | Nanostring |
| FZD1    | Nanostring |
| FZD3    | Nanostring |
| FZD4    | Nanostring |
| FZD5    | Nanostring |
| FZD6    | Nanostring |
| FZD7    | Nanostring |
| FZD8    | Nanostring |
| G6PC2   | Nanostring |
| G6PD    | Nanostring |
| GADD45B | Nanostring |
| GAS6    | Nanostring |
| GATA3   | Nanostring |
| GC      | Nanostring |
| GCG     | Nanostring |
| GDF10   | Nanostring |
| GDF15   | Nanostring |
| GDF3    | Nanostring |
| GDF6    | Nanostring |
| GDF9    | Nanostring |
| GDNF    | Nanostring |
| GLUD1   | Nanostring |
| GLUL    | Nanostring |
| GNLY    | Nanostring |
| GPBAR1  | Nanostring |
| GPER1   | Nanostring |
| GPNMB   | Nanostring |
| GPR183  | Nanostring |
| GPX1    | Nanostring |
| GPX3    | Nanostring |
| GSN     | Nanostring |
| GSTP1   | Nanostring |
| GZMA    | Nanostring |
| GZMB    | Nanostring |
| GZMH    | Nanostring |
| GZMK    | Nanostring |
| H2AZ1   | Nanostring |
| H4C3    | Nanostring |
| HAVCR2  | Nanostring |
| HBA1    | Nanostring |
| HBB     | Nanostring |
| HCAR2   | Nanostring |
| HCAR3   | Nanostring |
| HCK     | Nanostring |
| HCST    | Nanostring |
| HDAC1   | Nanostring |
| HDAC11  | Nanostring |

|          |            |
|----------|------------|
| HDAC3    | Nanostring |
| HDAC4    | Nanostring |
| HDAC5    | Nanostring |
| HGF      | Nanostring |
| HIF1A    | Nanostring |
| HILPDA   | Nanostring |
| HLA-A    | Nanostring |
| HLA-B    | Nanostring |
| HLA-C    | Nanostring |
| HLA-DPA1 | Nanostring |
| HLA-DPB1 | Nanostring |
| HLA-DQA1 | Nanostring |
| HLA-DQB1 | Nanostring |
| HLA-DRA  | Nanostring |
| HLA-DRB1 | Nanostring |
| HLA-DRB5 | Nanostring |
| HLA-E    | Nanostring |
| HMGCB2   | Nanostring |
| HMGIN2   | Nanostring |
| HPGDS    | Nanostring |
| HSD17B2  | Nanostring |
| HSD3B2   | Nanostring |
| HSP90AA1 | Nanostring |
| HSP90AB1 | Nanostring |
| HSP90B1  | Nanostring |
| HSPA1A   | Nanostring |
| HSPA1B   | Nanostring |
| HSPB1    | Nanostring |
| HTT      | Nanostring |
| IAPP     | Nanostring |
| ICAM1    | Nanostring |
| ICAM2    | Nanostring |
| ICAM3    | Nanostring |
| ICOS     | Nanostring |
| ICOSLG   | Nanostring |
| IDO1     | Nanostring |
| IER3     | Nanostring |
| IFI27    | Nanostring |
| IFIH1    | Nanostring |
| IFIT1    | Nanostring |
| IFITM1   | Nanostring |
| IFITM3   | Nanostring |
| IFNA1    | Nanostring |
| IFNAR1   | Nanostring |
| IFNAR2   | Nanostring |
| IFNB1    | Nanostring |
| IFNG     | Nanostring |
| IFNGR1   | Nanostring |
| IFNGR2   | Nanostring |
| IFNL2    | Nanostring |
| IFNL3    | Nanostring |
| IGF1     | Nanostring |
| IGF1R    | Nanostring |
| IGF2     | Nanostring |
| IGF2R    | Nanostring |
| IGFBP3   | Nanostring |
| IGFBP5   | Nanostring |
| IGFBP6   | Nanostring |
| IGFBP7   | Nanostring |
| IGHA1    | Nanostring |
| IGHD     | Nanostring |
| IGHG1    | Nanostring |
| IGHG2    | Nanostring |
| IGHM     | Nanostring |
| IGKC     | Nanostring |
| IL10     | Nanostring |
| IL10RA   | Nanostring |
| IL10RB   | Nanostring |
| IL11     | Nanostring |
| IL11RA   | Nanostring |
| IL12A    | Nanostring |
| IL12B    | Nanostring |
| IL12RB1  | Nanostring |
| IL12RB2  | Nanostring |
| IL13RA1  | Nanostring |
| IL15     | Nanostring |
| IL15RA   | Nanostring |
| IL16     | Nanostring |
| IL17A    | Nanostring |
| IL17B    | Nanostring |
| IL17D    | Nanostring |
| IL17RA   | Nanostring |
| IL17RB   | Nanostring |
| IL17RE   | Nanostring |
| IL18     | Nanostring |
| IL18R1   | Nanostring |
| IL1A     | Nanostring |
| IL1B     | Nanostring |
| IL1R1    | Nanostring |
| IL1R2    | Nanostring |
| IL1RAP   | Nanostring |

|         |            |
|---------|------------|
| IL1RL1  | Nanostring |
| IL1RN   | Nanostring |
| IL2     | Nanostring |
| IL20    | Nanostring |
| IL20RA  | Nanostring |
| IL22RA1 | Nanostring |
| IL23A   | Nanostring |
| IL24    | Nanostring |
| IL27RA  | Nanostring |
| IL2RA   | Nanostring |
| IL2RB   | Nanostring |
| IL2RG   | Nanostring |
| IL32    | Nanostring |
| IL33    | Nanostring |
| IL34    | Nanostring |
| IL36G   | Nanostring |
| IL3RA   | Nanostring |
| IL4R    | Nanostring |
| IL6     | Nanostring |
| IL6R    | Nanostring |
| IL6ST   | Nanostring |
| IL7     | Nanostring |
| IL7R    | Nanostring |
| INHHA   | Nanostring |
| INHBA   | Nanostring |
| INHBB   | Nanostring |
| INS     | Nanostring |
| INSR    | Nanostring |
| IRF3    | Nanostring |
| IRF4    | Nanostring |
| ITGA1   | Nanostring |
| ITGA2   | Nanostring |
| ITGA3   | Nanostring |
| ITGA5   | Nanostring |
| ITGA6   | Nanostring |
| ITGA9   | Nanostring |
| ITGAE   | Nanostring |
| ITGAL   | Nanostring |
| ITGAM   | Nanostring |
| ITGAV   | Nanostring |
| ITGAX   | Nanostring |
| ITGB1   | Nanostring |
| ITGB2   | Nanostring |
| ITGB4   | Nanostring |
| ITGB5   | Nanostring |
| ITGB6   | Nanostring |
| ITGB8   | Nanostring |
| ITK     | Nanostring |
| ITM2A   | Nanostring |
| JAG1    | Nanostring |
| JAK1    | Nanostring |
| JAK2    | Nanostring |
| JCHAIN  | Nanostring |
| JUN     | Nanostring |
| JUNB    | Nanostring |
| KDR     | Nanostring |
| KIT     | Nanostring |
| KITLG   | Nanostring |
| KLF2    | Nanostring |
| KLK3    | Nanostring |
| KLRB1   | Nanostring |
| KLRK1   | Nanostring |
| KRAS    | Nanostring |
| KRT1    | Nanostring |
| KRT10   | Nanostring |
| KRT13   | Nanostring |
| KRT14   | Nanostring |
| KRT15   | Nanostring |
| KRT16   | Nanostring |
| KRT17   | Nanostring |
| KRT18   | Nanostring |
| KRT19   | Nanostring |
| KRT20   | Nanostring |
| KRT23   | Nanostring |
| KRT24   | Nanostring |
| KRT4    | Nanostring |
| KRT5    | Nanostring |
| KRT6A   | Nanostring |
| KRT6B   | Nanostring |
| KRT6C   | Nanostring |
| KRT7    | Nanostring |
| KRT8    | Nanostring |
| KRT80   | Nanostring |
| KRT86   | Nanostring |
| LAG3    | Nanostring |
| LAIR1   | Nanostring |
| LAMP2   | Nanostring |
| LAMP3   | Nanostring |
| LCN2    | Nanostring |
| LDLR    | Nanostring |
| LEFTY1  | Nanostring |



|           |            |
|-----------|------------|
| LEFTY2    | Nanostring |
| LEP       | Nanostring |
| LGALS1    | Nanostring |
| LGALS3    | Nanostring |
| LGALS3BP  | Nanostring |
| LGALS9    | Nanostring |
| LIF       | Nanostring |
| LIFR      | Nanostring |
| LINC02446 | Nanostring |
| LMNA      | Nanostring |
| LPAR5     | Nanostring |
| LTB       | Nanostring |
| LTBR      | Nanostring |
| LTF       | Nanostring |
| LUM       | Nanostring |
| LY6D      | Nanostring |
| LY75      | Nanostring |
| LYN       | Nanostring |
| LYZ       | Nanostring |
| MAF       | Nanostring |
| MALAT1    | Nanostring |
| MAML2     | Nanostring |
| MAP1LC3B  | Nanostring |
| MAPK13    | Nanostring |
| MAPK14    | Nanostring |
| MARCO     | Nanostring |
| MECOM     | Nanostring |
| MEG3      | Nanostring |
| MERTK     | Nanostring |
| MET       | Nanostring |
| MGP       | Nanostring |
| MIF       | Nanostring |
| MKI67     | Nanostring |
| MMP1      | Nanostring |
| MMP10     | Nanostring |
| MMP12     | Nanostring |
| MMP14     | Nanostring |
| MMP16     | Nanostring |
| MMP19     | Nanostring |
| MMP2      | Nanostring |
| MMP3      | Nanostring |
| MMP7      | Nanostring |
| MMP8      | Nanostring |
| MMP9      | Nanostring |
| MPO       | Nanostring |
| MRC1      | Nanostring |
| MRC2      | Nanostring |
| MS4A1     | Nanostring |
| MS4A4A    | Nanostring |
| MSMB      | Nanostring |
| MST1R     | Nanostring |
| MT1X      | Nanostring |
| MT2A      | Nanostring |
| MTOR      | Nanostring |
| MTRNR2L1  | Nanostring |
| MX1       | Nanostring |
| MXRA8     | Nanostring |
| MYC       | Nanostring |
| MYH11     | Nanostring |
| MYL9      | Nanostring |
| MZB1      | Nanostring |
| MZT2A     | Nanostring |
| NANOG     | Nanostring |
| NCR1      | Nanostring |
| NDRG1     | Nanostring |
| NEAT1     | Nanostring |
| NFKB1     | Nanostring |
| NFKBIA    | Nanostring |
| NGFR      | Nanostring |
| NGG7      | Nanostring |
| NLRC4     | Nanostring |
| NLRC5     | Nanostring |
| NLRP1     | Nanostring |
| NLRP2     | Nanostring |
| NLRP3     | Nanostring |
| NOD2      | Nanostring |
| NOSIP     | Nanostring |
| NOTCH1    | Nanostring |
| NOTCH2    | Nanostring |
| NOTCH3    | Nanostring |
| NPPB      | Nanostring |
| NPPC      | Nanostring |
| NPR1      | Nanostring |
| NPR2      | Nanostring |
| NPR3      | Nanostring |
| NR1H2     | Nanostring |
| NR1H3     | Nanostring |
| NR1H4     | Nanostring |
| NR3C1     | Nanostring |
| NRG1      | Nanostring |
| NRG4      | Nanostring |

|          |            |
|----------|------------|
| NRIP3    | Nanostring |
| NRXN1    | Nanostring |
| NRXN3    | Nanostring |
| NTRK2    | Nanostring |
| OAS1     | Nanostring |
| OAS2     | Nanostring |
| OAS3     | Nanostring |
| OASL     | Nanostring |
| OLFM4    | Nanostring |
| OLR1     | Nanostring |
| OSM      | Nanostring |
| OSMR     | Nanostring |
| OXER1    | Nanostring |
| OXGR1    | Nanostring |
| P2RX5    | Nanostring |
| P2RY12   | Nanostring |
| PARP1    | Nanostring |
| PCNA     | Nanostring |
| PDCD1    | Nanostring |
| PDCD1LG2 | Nanostring |
| PDGFA    | Nanostring |
| PDGFB    | Nanostring |
| PDGFC    | Nanostring |
| PDGFD    | Nanostring |
| PDGFRA   | Nanostring |
| PDGFRB   | Nanostring |
| PECAM1   | Nanostring |
| PF4      | Nanostring |
| PGF      | Nanostring |
| PGR      | Nanostring |
| PHLDA2   | Nanostring |
| PIGR     | Nanostring |
| PLAZR1   | Nanostring |
| PLAC8    | Nanostring |
| PNOC     | Nanostring |
| POUSF1   | Nanostring |
| PPARA    | Nanostring |
| PPARD    | Nanostring |
| PPARG    | Nanostring |
| PPBP     | Nanostring |
| PRF1     | Nanostring |
| PROK2    | Nanostring |
| PROKR1   | Nanostring |
| PRSS2    | Nanostring |
| PSAP     | Nanostring |
| PSCA     | Nanostring |
| PTGDR2   | Nanostring |
| PTGDS    | Nanostring |
| PTGES    | Nanostring |
| PTGES2   | Nanostring |
| PTGES3   | Nanostring |
| PTGIS    | Nanostring |
| PTGS1    | Nanostring |
| PTGS2    | Nanostring |
| PTHLH    | Nanostring |
| PTK2     | Nanostring |
| PTK6     | Nanostring |
| PTPRC    | Nanostring |
| PTPRCAP  | Nanostring |
| PTTG1    | Nanostring |
| QRFPR    | Nanostring |
| RAC1     | Nanostring |
| RAC2     | Nanostring |
| RAD51    | Nanostring |
| RAMP1    | Nanostring |
| RAMP2    | Nanostring |
| RAMP3    | Nanostring |
| RARA     | Nanostring |
| RARB     | Nanostring |
| RARG     | Nanostring |
| RARRES1  | Nanostring |
| RARRES2  | Nanostring |
| RB1      | Nanostring |
| RBPJ     | Nanostring |
| REG1A    | Nanostring |
| RELA     | Nanostring |
| RELT     | Nanostring |
| RGCC     | Nanostring |
| RGS1     | Nanostring |
| RGS2     | Nanostring |
| RGS5     | Nanostring |
| RNF43    | Nanostring |
| ROR1     | Nanostring |
| RORA     | Nanostring |
| RPL21    | Nanostring |
| RPL22    | Nanostring |
| RPL32    | Nanostring |
| RPL34    | Nanostring |
| RPL37    | Nanostring |
| RPS4Y1   | Nanostring |
| RSPO1    | Nanostring |

|            |            |
|------------|------------|
| RSPO2      | Nanostring |
| RSPO3      | Nanostring |
| RUNX3      | Nanostring |
| RXRA       | Nanostring |
| RXRB       | Nanostring |
| RXK        | Nanostring |
| S100A10    | Nanostring |
| S100A2     | Nanostring |
| S100A4     | Nanostring |
| S100A6     | Nanostring |
| S100A8     | Nanostring |
| S100A9     | Nanostring |
| S100B      | Nanostring |
| S100P      | Nanostring |
| SAA1       | Nanostring |
| SAA2       | Nanostring |
| SAT1       | Nanostring |
| SCG5       | Nanostring |
| SCGB3A1    | Nanostring |
| SEC23A     | Nanostring |
| SEC61G     | Nanostring |
| SELENOP    | Nanostring |
| SELL       | Nanostring |
| SELPLG     | Nanostring |
| SERPINA1   | Nanostring |
| SERPINA3   | Nanostring |
| SERPINB5   | Nanostring |
| SERPINH1   | Nanostring |
| SFN        | Nanostring |
| SIGIRR     | Nanostring |
| SLC2A1     | Nanostring |
| SLC2A4     | Nanostring |
| SLC40A1    | Nanostring |
| SLPI       | Nanostring |
| SMAD2      | Nanostring |
| SMAD3      | Nanostring |
| SMAD4      | Nanostring |
| SMARCB1    | Nanostring |
| SMO        | Nanostring |
| SNAI1      | Nanostring |
| SNAI2      | Nanostring |
| SOD1       | Nanostring |
| SOD2       | Nanostring |
| SOSTDC1    | Nanostring |
| SOX2       | Nanostring |
| SOX4       | Nanostring |
| SOX9       | Nanostring |
| SPARCL1    | Nanostring |
| SPINK1     | Nanostring |
| SPOCK2     | Nanostring |
| SPP1       | Nanostring |
| SPRY2      | Nanostring |
| SPRY4      | Nanostring |
| SQSTM1     | Nanostring |
| SRC        | Nanostring |
| SREBF1     | Nanostring |
| SRGN       | Nanostring |
| SST        | Nanostring |
| ST6GAL1    | Nanostring |
| ST6GALNAC3 | Nanostring |
| STAT1      | Nanostring |
| STAT3      | Nanostring |
| STAT4      | Nanostring |
| STAT5A     | Nanostring |
| STAT5B     | Nanostring |
| STAT6      | Nanostring |
| STMN1      | Nanostring |
| SUCNR1     | Nanostring |
| SYK        | Nanostring |
| TACSTD2    | Nanostring |
| TAGLN      | Nanostring |
| TAP1       | Nanostring |
| TAP2       | Nanostring |
| TBX21      | Nanostring |
| TCL1A      | Nanostring |
| TEK        | Nanostring |
| TFEB       | Nanostring |
| TGFB1      | Nanostring |
| TGFB2      | Nanostring |
| TGFB3      | Nanostring |
| TGFBR1     | Nanostring |
| TGFBR2     | Nanostring |
| THBS1      | Nanostring |
| THBS2      | Nanostring |
| TIE1       | Nanostring |
| TIGIT      | Nanostring |
| TIMP1      | Nanostring |
| TLR1       | Nanostring |
| TLR2       | Nanostring |
| TLR3       | Nanostring |
| TLR4       | Nanostring |

|            |           |            |
|------------|-----------|------------|
|            | TLR5      | Nanostring |
|            | TLR7      | Nanostring |
|            | TLR8      | Nanostring |
|            | TM4SF1    | Nanostring |
|            | TNF       | Nanostring |
|            | TNFAIP6   | Nanostring |
|            | TNFRSF10A | Nanostring |
|            | TNFRSF10B | Nanostring |
|            | TNFRSF10D | Nanostring |
|            | TNFRSF11A | Nanostring |
|            | TNFRSF11B | Nanostring |
|            | TNFRSF12A | Nanostring |
|            | TNFRSF13B | Nanostring |
|            | TNFRSF14  | Nanostring |
|            | TNFRSF17  | Nanostring |
|            | TNFRSF18  | Nanostring |
|            | TNFRSF19  | Nanostring |
|            | TNFRSF1A  | Nanostring |
|            | TNFRSF1B  | Nanostring |
|            | TNFRSF21  | Nanostring |
|            | TNFRSF4   | Nanostring |
|            | TNFRSF9   | Nanostring |
|            | TNFSF10   | Nanostring |
|            | TNFSF12   | Nanostring |
|            | TNFSF13B  | Nanostring |
|            | TNFSF14   | Nanostring |
|            | TNFSF15   | Nanostring |
|            | TNFSF18   | Nanostring |
|            | TNFSF4    | Nanostring |
|            | TNFSF8    | Nanostring |
|            | TNFSF9    | Nanostring |
|            | TOP2A     | Nanostring |
|            | TOX       | Nanostring |
|            | TP53      | Nanostring |
|            | TPM1      | Nanostring |
|            | TPM2      | Nanostring |
|            | TPSAB1    | Nanostring |
|            | TPSB2     | Nanostring |
|            | TSC22D1   | Nanostring |
|            | TSHZ2     | Nanostring |
|            | TSLP      | Nanostring |
|            | TTR       | Nanostring |
|            | TUBB      | Nanostring |
|            | TUBB4B    | Nanostring |
|            | TWIST1    | Nanostring |
|            | TWIST2    | Nanostring |
|            | TXK       | Nanostring |
|            | TYK2      | Nanostring |
|            | TYMS      | Nanostring |
|            | TYROBP    | Nanostring |
|            | UBE2C     | Nanostring |
|            | UCP1      | Nanostring |
|            | UPK3A     | Nanostring |
|            | VCAM1     | Nanostring |
|            | VCAN      | Nanostring |
|            | VEGFA     | Nanostring |
|            | VEGFB     | Nanostring |
|            | VEGFC     | Nanostring |
|            | VEGFD     | Nanostring |
|            | VHL       | Nanostring |
|            | VIM       | Nanostring |
|            | VPREB3    | Nanostring |
|            | VSIR      | Nanostring |
|            | VTN       | Nanostring |
|            | VWF       | Nanostring |
|            | WIF1      | Nanostring |
|            | WNT10B    | Nanostring |
|            | WNT11     | Nanostring |
|            | WNT2      | Nanostring |
|            | WNT2B     | Nanostring |
|            | WNT3      | Nanostring |
|            | WNT5A     | Nanostring |
|            | WNT5B     | Nanostring |
|            | WNT7A     | Nanostring |
|            | WNT7B     | Nanostring |
|            | WNT9A     | Nanostring |
|            | XBP1      | Nanostring |
|            | XCL1      | Nanostring |
|            | XCL2      | Nanostring |
|            | YBX3      | Nanostring |
|            | YES1      | Nanostring |
|            | ZFP36     | Nanostring |
| CosMx      | AATK      | Nanostring |
| SMI 1000-  | ABL1      | Nanostring |
| plex panel | ABL2      | Nanostring |
|            | ACACB     | Nanostring |
|            | ACE       | Nanostring |
|            | ACKR1     | Nanostring |
|            | ACKR3     | Nanostring |
|            | ACKR4     | Nanostring |
|            | ACP5      | Nanostring |

|          |            |
|----------|------------|
| ACTA2    | Nanostring |
| ACTG2    | Nanostring |
| ACVR1    | Nanostring |
| ACVR1B   | Nanostring |
| ACVR2A   | Nanostring |
| ACVRL1   | Nanostring |
| ADGRA2   | Nanostring |
| ADGRA3   | Nanostring |
| ADGRE2   | Nanostring |
| ADGRE5   | Nanostring |
| ADGRF1   | Nanostring |
| ADGRF3   | Nanostring |
| ADGRF5   | Nanostring |
| ADGRG1   | Nanostring |
| ADGRG3   | Nanostring |
| ADGRG5   | Nanostring |
| ADGRG6   | Nanostring |
| ADGRL1   | Nanostring |
| ADGRL2   | Nanostring |
| ADGRL4   | Nanostring |
| ADGRV1   | Nanostring |
| ADIPOQ   | Nanostring |
| ADIRF    | Nanostring |
| ADM2     | Nanostring |
| AGR2     | Nanostring |
| AHI1     | Nanostring |
| AHR      | Nanostring |
| AIF1     | Nanostring |
| AKT1     | Nanostring |
| ALCAM    | Nanostring |
| ALOX5AP  | Nanostring |
| ANGPT1   | Nanostring |
| ANGPT2   | Nanostring |
| ANGPTL1  | Nanostring |
| ANKRD1   | Nanostring |
| ANXA1    | Nanostring |
| ANXA2    | Nanostring |
| ANXA4    | Nanostring |
| APOA1    | Nanostring |
| APOC1    | Nanostring |
| APOD     | Nanostring |
| APOE     | Nanostring |
| APP      | Nanostring |
| AQP3     | Nanostring |
| AR       | Nanostring |
| AREG     | Nanostring |
| ARF1     | Nanostring |
| ARG1     | Nanostring |
| ARHGDB   | Nanostring |
| ARID5B   | Nanostring |
| ATF3     | Nanostring |
| ATG10    | Nanostring |
| ATG12    | Nanostring |
| ATG5     | Nanostring |
| ATM      | Nanostring |
| ATP5F1B  | Nanostring |
| ATP5F1E  | Nanostring |
| ATR      | Nanostring |
| AXL      | Nanostring |
| AZGP1    | Nanostring |
| AZU1     | Nanostring |
| B2M      | Nanostring |
| B3GNT7   | Nanostring |
| BAG3     | Nanostring |
| BASP1    | Nanostring |
| BAX      | Nanostring |
| BBLN     | Nanostring |
| BCL2     | Nanostring |
| BCL2L1   | Nanostring |
| BECN1    | Nanostring |
| BEST1    | Nanostring |
| BGN      | Nanostring |
| BID      | Nanostring |
| BIRC3    | Nanostring |
| BIRC5    | Nanostring |
| BMP1     | Nanostring |
| BMP2     | Nanostring |
| BMP3     | Nanostring |
| BMP4     | Nanostring |
| BMP5     | Nanostring |
| BMP7     | Nanostring |
| BMPR1A   | Nanostring |
| BMPR2    | Nanostring |
| BRAF     | Nanostring |
| BRCA1    | Nanostring |
| BST1     | Nanostring |
| BST2     | Nanostring |
| BTF3     | Nanostring |
| BTG1     | Nanostring |
| BTK      | Nanostring |
| C11orf96 | Nanostring |

|            |            |
|------------|------------|
| C1QA       | Nanostring |
| C1QB       | Nanostring |
| C1QC       | Nanostring |
| CSAR2      | Nanostring |
| CACNA1C    | Nanostring |
| CALB1      | Nanostring |
| CALD1      | Nanostring |
| CALM1      | Nanostring |
| CALM2      | Nanostring |
| CALM3      | Nanostring |
| CAMP       | Nanostring |
| CARMN      | Nanostring |
| CASP3      | Nanostring |
| CASP8      | Nanostring |
| CASR       | Nanostring |
| CAV1       | Nanostring |
| CCDC80     | Nanostring |
| CCL11      | Nanostring |
| CCL13      | Nanostring |
| CCL15      | Nanostring |
| CCL17      | Nanostring |
| CCL18      | Nanostring |
| CCL19      | Nanostring |
| CCL2       | Nanostring |
| CCL20      | Nanostring |
| CCL21      | Nanostring |
| CCL22      | Nanostring |
| CCL26      | Nanostring |
| CCL28      | Nanostring |
| CCL3/L1/L3 | Nanostring |
| CCL4/L1/L2 | Nanostring |
| CCL5       | Nanostring |
| CCL8       | Nanostring |
| CCND1      | Nanostring |
| CCR1       | Nanostring |
| CCR10      | Nanostring |
| CCR2       | Nanostring |
| CCR5       | Nanostring |
| CCR7       | Nanostring |
| CCRL2      | Nanostring |
| CD14       | Nanostring |
| CD163      | Nanostring |
| CD164      | Nanostring |
| CD19       | Nanostring |
| CD1C       | Nanostring |
| CD2        | Nanostring |
| CD209      | Nanostring |
| CD22       | Nanostring |
| CD24       | Nanostring |
| CD27       | Nanostring |
| CD274      | Nanostring |
| CD276      | Nanostring |
| CD28       | Nanostring |
| CD300A     | Nanostring |
| CD33       | Nanostring |
| CD34       | Nanostring |
| CD36       | Nanostring |
| CD37       | Nanostring |
| CD38       | Nanostring |
| CD3D       | Nanostring |
| CD3E       | Nanostring |
| CD3G       | Nanostring |
| CD4        | Nanostring |
| CD40       | Nanostring |
| CD40LG     | Nanostring |
| CD44       | Nanostring |
| CD47       | Nanostring |
| CD48       | Nanostring |
| CD52       | Nanostring |
| CD53       | Nanostring |
| CD55       | Nanostring |
| CD58       | Nanostring |
| CD59       | Nanostring |
| CD5L       | Nanostring |
| CD63       | Nanostring |
| CD68       | Nanostring |
| CD69       | Nanostring |
| CD70       | Nanostring |
| CD74       | Nanostring |
| CD79A      | Nanostring |
| CD80       | Nanostring |
| CD81       | Nanostring |
| CD83       | Nanostring |
| CD84       | Nanostring |
| CD86       | Nanostring |
| CD8A       | Nanostring |
| CD8B       | Nanostring |
| CD9        | Nanostring |
| CD93       | Nanostring |
| CDH1       | Nanostring |
| CDH11      | Nanostring |

|           |            |
|-----------|------------|
| CDH19     | Nanostring |
| CDH5      | Nanostring |
| CDKN1A    | Nanostring |
| CDKN3     | Nanostring |
| CEACAM1   | Nanostring |
| CEACAM6   | Nanostring |
| CELSR1    | Nanostring |
| CELSR2    | Nanostring |
| CENPF     | Nanostring |
| CFD       | Nanostring |
| CFLAR     | Nanostring |
| CHEK1     | Nanostring |
| CHEK2     | Nanostring |
| CHI3L1    | Nanostring |
| CIDEA     | Nanostring |
| CIITA     | Nanostring |
| CLCF1     | Nanostring |
| CLDN4     | Nanostring |
| CLEC10A   | Nanostring |
| CLEC12A   | Nanostring |
| CLEC14A   | Nanostring |
| CLEC1A    | Nanostring |
| CLEC2B    | Nanostring |
| CLEC2D    | Nanostring |
| CLEC4A    | Nanostring |
| CLEC4D    | Nanostring |
| CLEC4E    | Nanostring |
| CLEC5A    | Nanostring |
| CLEC7A    | Nanostring |
| CLOCK     | Nanostring |
| CLU       | Nanostring |
| CMKLR1    | Nanostring |
| CNTFR     | Nanostring |
| COL11A1   | Nanostring |
| COL12A1   | Nanostring |
| COL14A1   | Nanostring |
| COL15A1   | Nanostring |
| COL16A1   | Nanostring |
| COL17A1   | Nanostring |
| COL18A1   | Nanostring |
| COL1A1    | Nanostring |
| COL1A2    | Nanostring |
| COL21A1   | Nanostring |
| COL27A1   | Nanostring |
| COL3A1    | Nanostring |
| COL4A1    | Nanostring |
| COL4A2    | Nanostring |
| COL4A5    | Nanostring |
| COL5A1    | Nanostring |
| COL5A2    | Nanostring |
| COL5A3    | Nanostring |
| COL6A1    | Nanostring |
| COL6A2    | Nanostring |
| COL6A3    | Nanostring |
| COL8A1    | Nanostring |
| COL9A2    | Nanostring |
| COL9A3    | Nanostring |
| COTL1     | Nanostring |
| COX4I2    | Nanostring |
| CPA3      | Nanostring |
| CPB1      | Nanostring |
| CRIP1     | Nanostring |
| CRP       | Nanostring |
| CRYAB     | Nanostring |
| CSF1      | Nanostring |
| CSF1R     | Nanostring |
| CSF2      | Nanostring |
| CSF2RA    | Nanostring |
| CSF2RB    | Nanostring |
| CSF3      | Nanostring |
| CSF3R     | Nanostring |
| CSHL1     | Nanostring |
| CSK       | Nanostring |
| CSPG4     | Nanostring |
| CST7      | Nanostring |
| CSTB      | Nanostring |
| CTLA4     | Nanostring |
| CTNNB1    | Nanostring |
| CTSD      | Nanostring |
| CTSG      | Nanostring |
| CTSW      | Nanostring |
| CUZD1     | Nanostring |
| CX3CL1    | Nanostring |
| CX3CR1    | Nanostring |
| CXCL1/2/3 | Nanostring |
| CXCL10    | Nanostring |
| CXCL12    | Nanostring |
| CXCL13    | Nanostring |
| CXCL14    | Nanostring |
| CXCL16    | Nanostring |
| CXCL17    | Nanostring |

|          |            |
|----------|------------|
| CXCL5    | Nanostring |
| CXCL8    | Nanostring |
| CXCL9    | Nanostring |
| CXCR1    | Nanostring |
| CXCR2    | Nanostring |
| CXCR3    | Nanostring |
| CXCR4    | Nanostring |
| CXCR5    | Nanostring |
| CXCR6    | Nanostring |
| CYP1B1   | Nanostring |
| CYP2U1   | Nanostring |
| CYSTM1   | Nanostring |
| CYTOR    | Nanostring |
| DCN      | Nanostring |
| DDC      | Nanostring |
| DDIT3    | Nanostring |
| DDR1     | Nanostring |
| DDR2     | Nanostring |
| DDX58    | Nanostring |
| DHRS2    | Nanostring |
| DLL1     | Nanostring |
| DLL4     | Nanostring |
| DNMT1    | Nanostring |
| DNMT1    | Nanostring |
| DNMT3A   | Nanostring |
| DPP4     | Nanostring |
| DPT      | Nanostring |
| DST      | Nanostring |
| DUSP1    | Nanostring |
| DUSP2    | Nanostring |
| DUSP4    | Nanostring |
| DUSP5    | Nanostring |
| DUSP6    | Nanostring |
| EFNA1    | Nanostring |
| EFNA4    | Nanostring |
| EFNA5    | Nanostring |
| EFNB1    | Nanostring |
| EFNB2    | Nanostring |
| EGF      | Nanostring |
| EGFR     | Nanostring |
| EIF5A/L1 | Nanostring |
| ELANE    | Nanostring |
| EMP3     | Nanostring |
| ENG      | Nanostring |
| ENO1     | Nanostring |
| ENTPD1   | Nanostring |
| EOMES    | Nanostring |
| EPCAM    | Nanostring |
| EPHA2    | Nanostring |
| EPHA3    | Nanostring |
| EPHA4    | Nanostring |
| EPHA7    | Nanostring |
| EPHB2    | Nanostring |
| EPHB3    | Nanostring |
| EPHB4    | Nanostring |
| EPHB6    | Nanostring |
| EPOR     | Nanostring |
| ERBB2    | Nanostring |
| ERBB3    | Nanostring |
| ESAM     | Nanostring |
| ESR1     | Nanostring |
| ETS1     | Nanostring |
| ETV4     | Nanostring |
| ETV5     | Nanostring |
| EZH2     | Nanostring |
| EZR      | Nanostring |
| FABP4    | Nanostring |
| FABP5    | Nanostring |
| FAM30A   | Nanostring |
| FAP      | Nanostring |
| FAS      | Nanostring |
| FASLG    | Nanostring |
| FASN     | Nanostring |
| FAU      | Nanostring |
| FCER1G   | Nanostring |
| FCGBP    | Nanostring |
| FCGR3A/B | Nanostring |
| FCRLA    | Nanostring |
| FES      | Nanostring |
| FFAR2    | Nanostring |
| FFAR3    | Nanostring |
| FFAR4    | Nanostring |
| FGF1     | Nanostring |
| FGF12    | Nanostring |
| FGF13    | Nanostring |
| FGF18    | Nanostring |
| FGF2     | Nanostring |
| FGF7     | Nanostring |
| FGF9     | Nanostring |
| FGFR1    | Nanostring |
| FGFR2    | Nanostring |



|            |            |
|------------|------------|
| FGFR3      | Nanostring |
| FGG        | Nanostring |
| FGR        | Nanostring |
| FHIT       | Nanostring |
| FKBP11     | Nanostring |
| FKBP5      | Nanostring |
| FLT1       | Nanostring |
| FLT3LG     | Nanostring |
| FN1        | Nanostring |
| FOS        | Nanostring |
| FOXF1      | Nanostring |
| FOXP3      | Nanostring |
| FPR1       | Nanostring |
| FYB1       | Nanostring |
| FYN        | Nanostring |
| FZD1       | Nanostring |
| FZD3       | Nanostring |
| FZD4       | Nanostring |
| FZD5       | Nanostring |
| FZD6       | Nanostring |
| FZD7       | Nanostring |
| FZD8       | Nanostring |
| G0S2       | Nanostring |
| G6PD       | Nanostring |
| GADD45B    | Nanostring |
| GAS6       | Nanostring |
| GATA3      | Nanostring |
| GC         | Nanostring |
| GCG        | Nanostring |
| GDF15      | Nanostring |
| GLUD1      | Nanostring |
| GLUL       | Nanostring |
| GNLY       | Nanostring |
| GPBAR1     | Nanostring |
| GPER1      | Nanostring |
| GPNMB      | Nanostring |
| GPR183     | Nanostring |
| GPX1       | Nanostring |
| GPX3       | Nanostring |
| GSK3B      | Nanostring |
| GSN        | Nanostring |
| GSTP1      | Nanostring |
| GZMA       | Nanostring |
| GZMB       | Nanostring |
| GZMH       | Nanostring |
| GZMK       | Nanostring |
| H2AZ1      | Nanostring |
| H4C3       | Nanostring |
| HAVCR2     | Nanostring |
| HBAA1/2    | Nanostring |
| HBB        | Nanostring |
| HCAR2/3    | Nanostring |
| HCK        | Nanostring |
| HCST       | Nanostring |
| HDAC1      | Nanostring |
| HDAC11     | Nanostring |
| HDAC3      | Nanostring |
| HDAC4      | Nanostring |
| HDAC5      | Nanostring |
| HEXB       | Nanostring |
| HEY1       | Nanostring |
| HGF        | Nanostring |
| HIF1A      | Nanostring |
| HILPDA     | Nanostring |
| HLA-DPA1   | Nanostring |
| HLA-DPB1   | Nanostring |
| HLA-DQA1   | Nanostring |
| HLA-DQB1/2 | Nanostring |
| HLA-DRA    | Nanostring |
| HLA-DRB    | Nanostring |
| HMGCB2     | Nanostring |
| HMGCS1     | Nanostring |
| HMGN2      | Nanostring |
| HPGDS      | Nanostring |
| HSD17B2    | Nanostring |
| HSP90AA1   | Nanostring |
| HSP90AB1   | Nanostring |
| HSP90B1    | Nanostring |
| HSPA1A/B   | Nanostring |
| HSPB1      | Nanostring |
| HSPG2      | Nanostring |
| HTT        | Nanostring |
| IAPP       | Nanostring |
| ICA1       | Nanostring |
| ICAM1      | Nanostring |
| ICAM2      | Nanostring |
| ICAM3      | Nanostring |
| ICOS       | Nanostring |
| ICOSLG     | Nanostring |
| IDO1       | Nanostring |
| IER3       | Nanostring |

|          |            |
|----------|------------|
| IFI27    | Nanostring |
| IFI44L   | Nanostring |
| IFI6     | Nanostring |
| IFIH1    | Nanostring |
| IFIT1    | Nanostring |
| IFIT3    | Nanostring |
| IFITM1   | Nanostring |
| IFITM3   | Nanostring |
| IFNA1/13 | Nanostring |
| IFNAR1   | Nanostring |
| IFNAR2   | Nanostring |
| IFNG     | Nanostring |
| IFNGR1   | Nanostring |
| IFNGR2   | Nanostring |
| IFNL2/3  | Nanostring |
| IGF1     | Nanostring |
| IGF1R    | Nanostring |
| IGF2     | Nanostring |
| IGF2R    | Nanostring |
| IGFBP3   | Nanostring |
| IGFBP5   | Nanostring |
| IGFBP6   | Nanostring |
| IGFBP7   | Nanostring |
| IGHA1    | Nanostring |
| IGHD     | Nanostring |
| IGHG1    | Nanostring |
| IGHG2    | Nanostring |
| IGHM     | Nanostring |
| IGKC     | Nanostring |
| IKZF3    | Nanostring |
| IL10     | Nanostring |
| IL10RA   | Nanostring |
| IL10RB   | Nanostring |
| IL11     | Nanostring |
| IL11RA   | Nanostring |
| IL12A    | Nanostring |
| IL12B    | Nanostring |
| IL12RB1  | Nanostring |
| IL12RB2  | Nanostring |
| IL13RA1  | Nanostring |
| IL15     | Nanostring |
| IL15RA   | Nanostring |
| IL16     | Nanostring |
| IL17A    | Nanostring |
| IL17B    | Nanostring |
| IL17D    | Nanostring |
| IL17RA   | Nanostring |
| IL17RB   | Nanostring |
| IL17RE   | Nanostring |
| IL18     | Nanostring |
| IL18R1   | Nanostring |
| IL1A     | Nanostring |
| IL1B     | Nanostring |
| IL1R1    | Nanostring |
| IL1R2    | Nanostring |
| IL1RAP   | Nanostring |
| IL1RL1   | Nanostring |
| IL1RN    | Nanostring |
| IL2      | Nanostring |
| IL20     | Nanostring |
| IL20RA   | Nanostring |
| IL22RA1  | Nanostring |
| IL23A    | Nanostring |
| IL24     | Nanostring |
| IL27RA   | Nanostring |
| IL2RA    | Nanostring |
| IL2RB    | Nanostring |
| IL2RG    | Nanostring |
| IL32     | Nanostring |
| IL33     | Nanostring |
| IL34     | Nanostring |
| IL36G    | Nanostring |
| IL3RA    | Nanostring |
| IL4R     | Nanostring |
| IL6      | Nanostring |
| IL6R     | Nanostring |
| IL6ST    | Nanostring |
| IL7      | Nanostring |
| IL7R     | Nanostring |
| INHHA    | Nanostring |
| INHBA    | Nanostring |
| INHBB    | Nanostring |
| INS      | Nanostring |
| INSIG1   | Nanostring |
| INSR     | Nanostring |
| IRF3     | Nanostring |
| IRF4     | Nanostring |
| ISG15    | Nanostring |
| ITGA1    | Nanostring |
| ITGA2    | Nanostring |
| ITGA3    | Nanostring |

|            |            |
|------------|------------|
| ITGA5      | Nanostring |
| ITGA6      | Nanostring |
| ITGA8      | Nanostring |
| ITGA9      | Nanostring |
| ITGAE      | Nanostring |
| ITGAL      | Nanostring |
| ITGAM      | Nanostring |
| ITGAV      | Nanostring |
| ITGAX      | Nanostring |
| ITGB1      | Nanostring |
| ITGB2      | Nanostring |
| ITGB4      | Nanostring |
| ITGB5      | Nanostring |
| ITGB6      | Nanostring |
| ITGB8      | Nanostring |
| ITK        | Nanostring |
| ITM2A      | Nanostring |
| ITM2B      | Nanostring |
| JAG1       | Nanostring |
| JAK1       | Nanostring |
| JAK2       | Nanostring |
| JCHAIN     | Nanostring |
| JUN        | Nanostring |
| JUNB       | Nanostring |
| KDR        | Nanostring |
| KIT        | Nanostring |
| KITLG      | Nanostring |
| KLF2       | Nanostring |
| KLK3       | Nanostring |
| KLRB1      | Nanostring |
| KLRF1      | Nanostring |
| KLRK1      | Nanostring |
| KRAS       | Nanostring |
| KRT1       | Nanostring |
| KRT10      | Nanostring |
| KRT13      | Nanostring |
| KRT14      | Nanostring |
| KRT15      | Nanostring |
| KRT16      | Nanostring |
| KRT17      | Nanostring |
| KRT18      | Nanostring |
| KRT19      | Nanostring |
| KRT20      | Nanostring |
| KRT23      | Nanostring |
| KRT4       | Nanostring |
| KRT5       | Nanostring |
| KRT6A/B/C  | Nanostring |
| KRT7       | Nanostring |
| KRT8       | Nanostring |
| KRT80      | Nanostring |
| KRT86      | Nanostring |
| LAG3       | Nanostring |
| LAIR1      | Nanostring |
| LAMA4      | Nanostring |
| LAMP2      | Nanostring |
| LAMP3      | Nanostring |
| LCN2       | Nanostring |
| LDB2       | Nanostring |
| LDHA       | Nanostring |
| LDLR       | Nanostring |
| LEFTY1     | Nanostring |
| LEP        | Nanostring |
| LGALS1     | Nanostring |
| LGALS3     | Nanostring |
| LGALS3BP   | Nanostring |
| LGALS9     | Nanostring |
| LGR5       | Nanostring |
| LIF        | Nanostring |
| LIFR       | Nanostring |
| LINC01781  | Nanostring |
| LINC01857  | Nanostring |
| LINC02446  | Nanostring |
| LMNA       | Nanostring |
| LPAR5      | Nanostring |
| LTB        | Nanostring |
| LTBR       | Nanostring |
| LTF        | Nanostring |
| LUM        | Nanostring |
| LY6D       | Nanostring |
| LY75       | Nanostring |
| LYN        | Nanostring |
| LYVE1      | Nanostring |
| LYZ        | Nanostring |
| MAF        | Nanostring |
| MALAT1     | Nanostring |
| MAML2      | Nanostring |
| MAP1LC3B/2 | Nanostring |
| MAP2K1     | Nanostring |
| MAPK13     | Nanostring |
| MAPK14     | Nanostring |
| MARCKSL1   | Nanostring |

|             |            |
|-------------|------------|
| MARCO       | Nanostring |
| MB          | Nanostring |
| MECOM       | Nanostring |
| MEG3        | Nanostring |
| MERTK       | Nanostring |
| MET         | Nanostring |
| MFAP5       | Nanostring |
| MGP         | Nanostring |
| MHC I       | Nanostring |
| MIF         | Nanostring |
| MIR4435-2HG | Nanostring |
| MKI67       | Nanostring |
| MMP1        | Nanostring |
| MMP12       | Nanostring |
| MMP14       | Nanostring |
| MMP19       | Nanostring |
| MMP2        | Nanostring |
| MMP7        | Nanostring |
| MMP9        | Nanostring |
| MPO         | Nanostring |
| MRC1        | Nanostring |
| MR2         | Nanostring |
| MS4A1       | Nanostring |
| MS4A4A      | Nanostring |
| MS4A6A      | Nanostring |
| MSMB        | Nanostring |
| MSR1        | Nanostring |
| MST1R       | Nanostring |
| MT1X        | Nanostring |
| MT2A        | Nanostring |
| MTOR        | Nanostring |
| MX1         | Nanostring |
| MXRA8       | Nanostring |
| MYC         | Nanostring |
| MYH11       | Nanostring |
| MYH6        | Nanostring |
| MYL12A      | Nanostring |
| MYL4        | Nanostring |
| MYL7        | Nanostring |
| MYL9        | Nanostring |
| MZB1        | Nanostring |
| MZT2A/B     | Nanostring |
| NACA        | Nanostring |
| NANOG       | Nanostring |
| NCAM1       | Nanostring |
| NCR1        | Nanostring |
| NDRG1       | Nanostring |
| NDUFA4L2    | Nanostring |
| NEAT1       | Nanostring |
| NELL2       | Nanostring |
| NFKB1       | Nanostring |
| NFKBIA      | Nanostring |
| NGFR        | Nanostring |
| NG2         | Nanostring |
| NLR4        | Nanostring |
| NLR5        | Nanostring |
| NLRP1       | Nanostring |
| NLRP2       | Nanostring |
| NLRP3       | Nanostring |
| NOD2        | Nanostring |
| NOSIP       | Nanostring |
| NOTCH1      | Nanostring |
| NOTCH2      | Nanostring |
| NOTCH3      | Nanostring |
| NPPC        | Nanostring |
| NPR1        | Nanostring |
| NPR2        | Nanostring |
| NPR3        | Nanostring |
| NR1H2       | Nanostring |
| NR1H3       | Nanostring |
| NR2F2       | Nanostring |
| NR3C1       | Nanostring |
| NRG1        | Nanostring |
| NRXN1       | Nanostring |
| NRXN3       | Nanostring |
| NTRK2       | Nanostring |
| NUPR1       | Nanostring |
| NUSAP1      | Nanostring |
| OAS1        | Nanostring |
| OAS2        | Nanostring |
| OAS3        | Nanostring |
| OASL        | Nanostring |
| OLFM4       | Nanostring |
| OLR1        | Nanostring |
| OSM         | Nanostring |
| OSMR        | Nanostring |
| P2RX5       | Nanostring |
| PARP1       | Nanostring |
| PCNA        | Nanostring |
| PDCD1       | Nanostring |
| PDCD1LG2    | Nanostring |

|         |            |
|---------|------------|
| PDGFA   | Nanostring |
| PDGFB   | Nanostring |
| PDGFC   | Nanostring |
| PDGFD   | Nanostring |
| PDGFRA  | Nanostring |
| PDGFRB  | Nanostring |
| PDSSA   | Nanostring |
| PECAM1  | Nanostring |
| PF4/V1  | Nanostring |
| PFN1    | Nanostring |
| PGF     | Nanostring |
| PGK1    | Nanostring |
| PGR     | Nanostring |
| PHLDA2  | Nanostring |
| PIGR    | Nanostring |
| PLAC8   | Nanostring |
| PLAC9   | Nanostring |
| PLCG1   | Nanostring |
| PLD3    | Nanostring |
| PNOC    | Nanostring |
| POUSF1  | Nanostring |
| PPARA   | Nanostring |
| PPARD   | Nanostring |
| PPARG   | Nanostring |
| PPIA    | Nanostring |
| PRF1    | Nanostring |
| PROX1   | Nanostring |
| PRSS2   | Nanostring |
| PRTN3   | Nanostring |
| PSAP    | Nanostring |
| PSCA    | Nanostring |
| PSD3    | Nanostring |
| PTEN    | Nanostring |
| PTGDR2  | Nanostring |
| PTGDS   | Nanostring |
| PTGES   | Nanostring |
| PTGES2  | Nanostring |
| PTGES3  | Nanostring |
| PTGIS   | Nanostring |
| PTGS1   | Nanostring |
| PTGS2   | Nanostring |
| PTK2    | Nanostring |
| PTK6    | Nanostring |
| PTPRC   | Nanostring |
| PTPRCAP | Nanostring |
| PTTG1   | Nanostring |
| PXDN    | Nanostring |
| QRFPR   | Nanostring |
| RAC1    | Nanostring |
| RAC2    | Nanostring |
| RACK1   | Nanostring |
| RAG1    | Nanostring |
| RAMP1   | Nanostring |
| RAMP2   | Nanostring |
| RAMP3   | Nanostring |
| RARA    | Nanostring |
| RARB    | Nanostring |
| RARG    | Nanostring |
| RARRES1 | Nanostring |
| RARRES2 | Nanostring |
| RB1     | Nanostring |
| RBM47   | Nanostring |
| RBPJ    | Nanostring |
| REG1A   | Nanostring |
| RELA    | Nanostring |
| RELT    | Nanostring |
| RGCC    | Nanostring |
| RGS1    | Nanostring |
| RGS13   | Nanostring |
| RGS2    | Nanostring |
| RGS5    | Nanostring |
| RNF43   | Nanostring |
| ROR1    | Nanostring |
| RORA    | Nanostring |
| RPL21   | Nanostring |
| RPL22   | Nanostring |
| RPL32   | Nanostring |
| RPL34   | Nanostring |
| RPL37   | Nanostring |
| RPSA1   | Nanostring |
| RSPO3   | Nanostring |
| RUNX3   | Nanostring |
| RXRA    | Nanostring |
| RXRB    | Nanostring |
| RYK     | Nanostring |
| RYR2    | Nanostring |
| S100A10 | Nanostring |
| S100A2  | Nanostring |
| S100A4  | Nanostring |
| S100A6  | Nanostring |
| S100A8  | Nanostring |

|            |            |
|------------|------------|
| S100A9     | Nanostring |
| S100B      | Nanostring |
| S100P      | Nanostring |
| SAA1/2     | Nanostring |
| SAT1       | Nanostring |
| SCG5       | Nanostring |
| SCGB3A1    | Nanostring |
| SEC23A     | Nanostring |
| SEC61G     | Nanostring |
| SELENOP    | Nanostring |
| SELL       | Nanostring |
| SELPLG     | Nanostring |
| SERPINA1   | Nanostring |
| SERPINA3   | Nanostring |
| SERPINB5   | Nanostring |
| SERPINH1   | Nanostring |
| SFN        | Nanostring |
| SH3BGRL3   | Nanostring |
| SIGIRR     | Nanostring |
| SLA        | Nanostring |
| SLC2A1     | Nanostring |
| SLC40A1    | Nanostring |
| SLCO2B1    | Nanostring |
| SLPI       | Nanostring |
| SMAD2      | Nanostring |
| SMAD3      | Nanostring |
| SMAD4      | Nanostring |
| SMARCB1    | Nanostring |
| SMO        | Nanostring |
| SNAI1      | Nanostring |
| SNAI2      | Nanostring |
| SOD1       | Nanostring |
| SOD2       | Nanostring |
| SORBS1     | Nanostring |
| SOSTDC1    | Nanostring |
| SOX2       | Nanostring |
| SOX4       | Nanostring |
| SOX9       | Nanostring |
| SPARCL1    | Nanostring |
| SPINK1     | Nanostring |
| SPOCK2     | Nanostring |
| SPP1       | Nanostring |
| SPRY2      | Nanostring |
| SPRY4      | Nanostring |
| SQLC       | Nanostring |
| SQSTM1     | Nanostring |
| SRC        | Nanostring |
| SREBF1     | Nanostring |
| SRGN       | Nanostring |
| SRSF2      | Nanostring |
| SST        | Nanostring |
| ST6GAL1    | Nanostring |
| ST6GALNAC3 | Nanostring |
| STAT1      | Nanostring |
| STAT3      | Nanostring |
| STAT4      | Nanostring |
| STAT5A     | Nanostring |
| STAT5B     | Nanostring |
| STAT6      | Nanostring |
| STMN1      | Nanostring |
| SYK        | Nanostring |
| TACSTD2    | Nanostring |
| TAGLN      | Nanostring |
| TAP1       | Nanostring |
| TAP2       | Nanostring |
| TBX21      | Nanostring |
| TCAP       | Nanostring |
| TCF7       | Nanostring |
| TCL1A      | Nanostring |
| TEK        | Nanostring |
| TFEB       | Nanostring |
| TGFB1      | Nanostring |
| TGFB2      | Nanostring |
| TGFB3      | Nanostring |
| TGFB1      | Nanostring |
| TGFBR1     | Nanostring |
| TGFBR2     | Nanostring |
| THBS1      | Nanostring |
| THBS2      | Nanostring |
| THSD4      | Nanostring |
| TIE1       | Nanostring |
| TIGIT      | Nanostring |
| TIMP1      | Nanostring |
| TLR1       | Nanostring |
| TLR2       | Nanostring |
| TLR3       | Nanostring |
| TLR4       | Nanostring |
| TLR5       | Nanostring |
| TLR7       | Nanostring |
| TLR8       | Nanostring |
| TM4SF1     | Nanostring |

|           |            |
|-----------|------------|
| TNF       | Nanostring |
| TNFAIP6   | Nanostring |
| TNFRSF10A | Nanostring |
| TNFRSF10B | Nanostring |
| TNFRSF10D | Nanostring |
| TNFRSF11A | Nanostring |
| TNFRSF11B | Nanostring |
| TNFRSF12A | Nanostring |
| TNFRSF13B | Nanostring |
| TNFRSF14  | Nanostring |
| TNFRSF17  | Nanostring |
| TNFRSF18  | Nanostring |
| TNFRSF19  | Nanostring |
| TNFRSF1A  | Nanostring |
| TNFRSF1B  | Nanostring |
| TNFRSF21  | Nanostring |
| TNFRSF4   | Nanostring |
| TNFRSF9   | Nanostring |
| TNFSF10   | Nanostring |
| TNFSF12   | Nanostring |
| TNFSF13B  | Nanostring |
| TNFSF14   | Nanostring |
| TNFSF15   | Nanostring |
| TNFSF4    | Nanostring |
| TNFSF8    | Nanostring |
| TNFSF9    | Nanostring |
| TNNC1     | Nanostring |
| TNNT2     | Nanostring |
| TNXA/B    | Nanostring |
| TOP2A     | Nanostring |
| TOX       | Nanostring |
| TP53      | Nanostring |
| TP1       | Nanostring |
| TPM1      | Nanostring |
| TPM2      | Nanostring |
| TPSAB1/B2 | Nanostring |
| TPT1      | Nanostring |
| TSC22D1   | Nanostring |
| TSHZ2     | Nanostring |
| TTN       | Nanostring |
| TTR       | Nanostring |
| TUBB      | Nanostring |
| TUBB4B    | Nanostring |
| TWIST1    | Nanostring |
| TWIST2    | Nanostring |
| TXK       | Nanostring |
| TYK2      | Nanostring |
| TYMS      | Nanostring |
| TYROBP    | Nanostring |
| UBA52     | Nanostring |
| UBE2C     | Nanostring |
| UPK3A     | Nanostring |
| VCAM1     | Nanostring |
| VCAN      | Nanostring |
| VEGFA     | Nanostring |
| VEGFB     | Nanostring |
| VEGFC     | Nanostring |
| VEGFD     | Nanostring |
| VHL       | Nanostring |
| VIM       | Nanostring |
| VPREB3    | Nanostring |
| VSIR      | Nanostring |
| VTN       | Nanostring |
| VWA1      | Nanostring |
| VWF       | Nanostring |
| WIF1      | Nanostring |
| WNT10B    | Nanostring |
| WNT11     | Nanostring |
| WNT3      | Nanostring |
| WNT5A     | Nanostring |
| WNT5B     | Nanostring |
| WNT7A     | Nanostring |
| WNT7B     | Nanostring |
| WNT9A     | Nanostring |
| XBP1      | Nanostring |
| XCL1/2    | Nanostring |
| XKR4      | Nanostring |
| YBX3      | Nanostring |
| YES1      | Nanostring |
| ZBTB16    | Nanostring |
| ZFP36     | Nanostring |

Supplementary Table 3. Antibodies and reagents.

| Assay type                     | Cell subsets                                                                                                                                     | Gating Strategy                                                                                                                                                                         |
|--------------------------------|--------------------------------------------------------------------------------------------------------------------------------------------------|-----------------------------------------------------------------------------------------------------------------------------------------------------------------------------------------|
| CyTOF supervised               | Epithelial                                                                                                                                       | EpCAM <sup>+</sup> CD45 <sup>-</sup>                                                                                                                                                    |
|                                | EpCAM <sup>+</sup> CD15 <sup>+</sup>                                                                                                             | EpCAM <sup>+</sup> CD15 <sup>+</sup>                                                                                                                                                    |
|                                | EpCAM <sup>+</sup> ICOS <sup>+</sup>                                                                                                             | EpCAM <sup>+</sup> ICOS <sup>+</sup>                                                                                                                                                    |
|                                | T                                                                                                                                                | CD45 <sup>+</sup> EpCAM <sup>-</sup> CD3 <sup>+</sup> gdTCR <sup>-</sup>                                                                                                                |
|                                | gd T                                                                                                                                             | CD45 <sup>+</sup> EpCAM <sup>-</sup> CD3 <sup>+</sup> gdTCR <sup>+</sup>                                                                                                                |
|                                | CD8 <sup>+</sup> T                                                                                                                               | CD45 <sup>+</sup> EpCAM <sup>-</sup> CD3 <sup>+</sup> gdTCR <sup>-</sup> CD4 <sup>-</sup> CD8a <sup>+</sup>                                                                             |
|                                | Naïve CD8 <sup>+</sup>                                                                                                                           | CD45 <sup>+</sup> CD3 <sup>+</sup> CD4 <sup>-</sup> CD8a <sup>+</sup> CD45RA <sup>+</sup> CCR7 <sup>+</sup>                                                                             |
|                                | CD8 <sup>+</sup> <sub>TCM</sub>                                                                                                                  | CD45 <sup>+</sup> CD3 <sup>+</sup> CD4 <sup>-</sup> CD8a <sup>+</sup> CD45RA <sup>-</sup> CCR7 <sup>+</sup>                                                                             |
|                                | CD8 <sup>+</sup> <sub>TEM</sub>                                                                                                                  | CD45 <sup>+</sup> CD3 <sup>+</sup> CD4 <sup>-</sup> CD8a <sup>+</sup> CD45RA <sup>-</sup> CCR7 <sup>-</sup>                                                                             |
|                                | CD8 <sup>+</sup> <sub>TEMRA</sub>                                                                                                                | CD45 <sup>+</sup> CD3 <sup>+</sup> CD4 <sup>-</sup> CD8a <sup>+</sup> CD45RA <sup>+</sup> CCR7 <sup>-</sup>                                                                             |
|                                | CD4 <sup>+</sup> T                                                                                                                               | CD45 <sup>+</sup> EpCAM <sup>-</sup> CD3 <sup>+</sup> gdTCR <sup>-</sup> CD4 <sup>+</sup> CD8a <sup>-</sup>                                                                             |
|                                | Naïve CD4 <sup>+</sup>                                                                                                                           | CD45 <sup>+</sup> CD3 <sup>+</sup> CD4 <sup>+</sup> CD8a <sup>-</sup> CD45RA <sup>+</sup> CCR7 <sup>+</sup>                                                                             |
|                                | CD4 <sup>+</sup> <sub>TCM</sub>                                                                                                                  | CD45 <sup>+</sup> CD3 <sup>+</sup> CD4 <sup>+</sup> CD8a <sup>-</sup> CD45RA <sup>-</sup> CCR7 <sup>+</sup>                                                                             |
|                                | CD4 <sup>+</sup> <sub>TEM</sub>                                                                                                                  | CD45 <sup>+</sup> CD3 <sup>+</sup> CD4 <sup>+</sup> CD8a <sup>-</sup> CD45RA <sup>-</sup> CCR7 <sup>-</sup>                                                                             |
|                                | CD4 <sup>+</sup> <sub>TEMRA</sub>                                                                                                                | CD45 <sup>+</sup> CD3 <sup>+</sup> CD4 <sup>+</sup> CD8a <sup>-</sup> CD45RA <sup>+</sup> CCR7 <sup>-</sup>                                                                             |
|                                | T <sub>reg</sub>                                                                                                                                 | CD45 <sup>+</sup> CD3 <sup>+</sup> CD4 <sup>+</sup> CD8a <sup>-</sup> FOXP3 <sup>+</sup> CTLA-4 <sup>+</sup> CD127 <sup>-</sup>                                                         |
|                                | NKT                                                                                                                                              | CD45 <sup>+</sup> EpCAM <sup>-</sup> CD3 <sup>+</sup> CD16 <sup>+</sup> CD56 <sup>+</sup>                                                                                               |
|                                | CD16 <sup>-</sup> NK                                                                                                                             | CD45 <sup>+</sup> EpCAM <sup>-</sup> CD3 <sup>-</sup> gdTCR <sup>-</sup> HLA-DR <sup>+</sup> CD19 <sup>-</sup> CD14 <sup>-</sup> CD7 <sup>+</sup> CD56 <sup>hi</sup> CD16 <sup>-</sup>  |
|                                | CD16 <sup>+</sup> NK                                                                                                                             | CD45 <sup>+</sup> EpCAM <sup>-</sup> CD3 <sup>-</sup> gdTCR <sup>-</sup> HLA-DR <sup>+</sup> CD19 <sup>-</sup> CD14 <sup>-</sup> CD7 <sup>+</sup> CD56 <sup>dim</sup> CD16 <sup>+</sup> |
|                                | Granulocytes                                                                                                                                     | CD45 <sup>+</sup> CD3 <sup>-</sup> CD19 <sup>-</sup> CD15 <sup>+</sup>                                                                                                                  |
|                                | B                                                                                                                                                | CD45 <sup>+</sup> EpCAM <sup>-</sup> CD3 <sup>-</sup> gdTCR <sup>-</sup> HLA-DR <sup>+</sup> CD7 <sup>-</sup> CD19 <sup>+</sup>                                                         |
|                                | Plasma                                                                                                                                           | CD45 <sup>+</sup> EpCAM <sup>-</sup> CD3 <sup>-</sup> HLA-DR <sup>-</sup> CD7 <sup>-</sup> CD31 <sup>-</sup> CD19 <sup>-</sup> CD38 <sup>+</sup>                                        |
|                                | cDC1                                                                                                                                             | CD45 <sup>+</sup> CD3 <sup>-</sup> CD7 <sup>-</sup> HLA-DR <sup>+</sup> CD19 <sup>-</sup> CD14 <sup>-</sup> CD11c <sup>+</sup> CD1c <sup>-</sup> CD141 <sup>+</sup>                     |
|                                | cDC2                                                                                                                                             | CD45 <sup>+</sup> CD3 <sup>-</sup> CD7 <sup>-</sup> HLA-DR <sup>+</sup> CD19 <sup>-</sup> CD14 <sup>-</sup> CD11c <sup>+</sup> CD1c <sup>+</sup> CD141 <sup>-</sup>                     |
|                                | cDC2b                                                                                                                                            | CD45 <sup>+</sup> CD3 <sup>-</sup> CD7 <sup>-</sup> HLA-DR <sup>+</sup> CD19 <sup>-</sup> CD14 <sup>-</sup> CD11c <sup>+</sup> CD1c <sup>+</sup>                                        |
|                                | pDC                                                                                                                                              | CD45 <sup>+</sup> CD3 <sup>-</sup> CD7 <sup>-</sup> HLA-DR <sup>+</sup> CD19 <sup>-</sup> CD14 <sup>-</sup> CD123 <sup>+</sup> CD11c <sup>-</sup> CD1c <sup>+</sup>                     |
|                                | Classical Monocytes                                                                                                                              | CD45 <sup>+</sup> CD3 <sup>-</sup> CD7 <sup>-</sup> HLA-DR <sup>+</sup> CD19 <sup>-</sup> CD14 <sup>+</sup> CD16 <sup>-</sup> CD163 <sup>-</sup>                                        |
| Non-Classical Monocytes        | CD45 <sup>+</sup> CD3 <sup>-</sup> CD7 <sup>-</sup> HLA-DR <sup>+</sup> CD19 <sup>-</sup> CD14 <sup>-</sup> CD16 <sup>+</sup>                    |                                                                                                                                                                                         |
| Macrophages                    | CD45 <sup>+</sup> CD3 <sup>-</sup> CD7 <sup>-</sup> HLA-DR <sup>+</sup> CD19 <sup>-</sup> CD14 <sup>+</sup> CD16 <sup>-</sup> CD163 <sup>+</sup> |                                                                                                                                                                                         |
| CyTOF unsupervised blood       | 1_ CD4 <sup>naïve</sup>                                                                                                                          | CD45 <sup>+</sup> CD3 <sup>+</sup> CD4 <sup>+</sup> CD8a <sup>-</sup> CD45RA <sup>+</sup> CCR7 <sup>+</sup>                                                                             |
|                                | 2,5_ CD4 <sup>TCM</sup>                                                                                                                          | CD45 <sup>+</sup> CD3 <sup>+</sup> CD4 <sup>+</sup> CD8a <sup>-</sup> CD45RA <sup>-</sup> CCR7 <sup>+</sup>                                                                             |
|                                | 3,6,9_ CD4 <sup>TEM</sup>                                                                                                                        | CD45 <sup>+</sup> CD3 <sup>+</sup> CD4 <sup>+</sup> CD8a <sup>-</sup> CD45RA <sup>-</sup> CCR7 <sup>-</sup>                                                                             |
|                                | 4_ CD8 <sup>naïve</sup>                                                                                                                          | CD45 <sup>+</sup> CD3 <sup>+</sup> CD8a <sup>+</sup> CD4 <sup>-</sup> CD45RA <sup>+</sup> CCR7 <sup>+</sup>                                                                             |
|                                | 7,10_ CD8 <sup>TEM</sup>                                                                                                                         | CD45 <sup>+</sup> CD3 <sup>+</sup> CD8a <sup>+</sup> CD4 <sup>-</sup> CD45RA <sup>-</sup> CCR7 <sup>-</sup>                                                                             |
|                                | 8_gd T                                                                                                                                           | CD45 <sup>+</sup> CD3 <sup>+</sup> gdTCR <sup>+</sup>                                                                                                                                   |
|                                | 11_CD8 T CD38 <sup>+</sup> HLA-DR <sup>+</sup>                                                                                                   | CD45 <sup>+</sup> CD8a <sup>+</sup> HLA-DR <sup>+</sup> CD38 <sup>+</sup>                                                                                                               |
|                                | 12_CD4 T CD38 <sup>+</sup> HLA-DR <sup>+</sup>                                                                                                   | CD45 <sup>+</sup> CD4 <sup>+</sup> HLA-DR <sup>+</sup> CD38 <sup>+</sup>                                                                                                                |
|                                | 13_NK CD56 <sup>high</sup>                                                                                                                       | CD45 <sup>+</sup> CD7 <sup>+</sup> CD56 <sup>hi</sup> CD16 <sup>hi</sup>                                                                                                                |
|                                | 14_NK CD56 <sup>low</sup>                                                                                                                        | CD45 <sup>+</sup> CD7 <sup>+</sup> CD56 <sup>low</sup> CD16 <sup>low</sup>                                                                                                              |
|                                | 15_B                                                                                                                                             | CD45 <sup>+</sup> HLA-DR <sup>+</sup> CD7 <sup>-</sup> CD19 <sup>+</sup>                                                                                                                |
|                                | 16_Granulocyte                                                                                                                                   | CD45 <sup>+</sup> CD16 <sup>+</sup> CD15 <sup>+</sup>                                                                                                                                   |
|                                | 17_mDC                                                                                                                                           | CD45 <sup>+</sup> CD7 <sup>-</sup> HLA-DR <sup>+</sup> CD14 <sup>low</sup> CD123 <sup>-</sup> CD11c <sup>+</sup>                                                                        |
|                                | 18,20,21_Classical Monocytes                                                                                                                     | CD45 <sup>+</sup> CD7 <sup>-</sup> HLA-DR <sup>+</sup> CD14 <sup>+</sup> CD16 <sup>-</sup> CD163 <sup>-</sup>                                                                           |
| 19_Non classical Monocytes     | CD45 <sup>+</sup> CD7 <sup>-</sup> HLA-DR <sup>+</sup> CD14 <sup>-</sup> CD16 <sup>+</sup>                                                       |                                                                                                                                                                                         |
| CyTOF unsupervised biopsy      | 1,4_Epithelial                                                                                                                                   | EpCAM <sup>+</sup>                                                                                                                                                                      |
|                                | 2,3_EpCAM <sup>+</sup> CD15 <sup>high</sup>                                                                                                      | EpCAM <sup>+</sup> CD15 <sup>hi</sup>                                                                                                                                                   |
|                                | 5,6,8_EpCAM <sup>+</sup> ICOS <sup>high</sup>                                                                                                    | EpCAM <sup>+</sup> ICOS <sup>hi</sup>                                                                                                                                                   |
|                                | 9,12_EpCAM <sup>+</sup> HLA-DR <sup>+</sup>                                                                                                      | EpCAM <sup>+</sup> HLA-DR <sup>+</sup>                                                                                                                                                  |
|                                | 11,17_Stromal S1                                                                                                                                 | CD45 <sup>-</sup> CD31 <sup>-</sup> EpCAM <sup>-</sup> CD56 <sup>+</sup>                                                                                                                |
|                                | 13_Stromal                                                                                                                                       | CD45 <sup>-</sup> CD31 <sup>-</sup> EpCAM <sup>-</sup>                                                                                                                                  |
|                                | 14_B                                                                                                                                             | CD45 <sup>+</sup> HLA-DR <sup>+</sup> CD19 <sup>+</sup>                                                                                                                                 |
|                                | 15_Endothelial                                                                                                                                   | CD45 <sup>-</sup> HLA-DR <sup>+</sup> EpCAM <sup>-</sup> CD31 <sup>+</sup>                                                                                                              |
|                                | 16_CD4 T                                                                                                                                         | CD45 <sup>+</sup> CD3 <sup>+</sup> CD4 <sup>+</sup> CD8a <sup>-</sup>                                                                                                                   |
|                                | 18_MNP-mDC and Macrophages                                                                                                                       | CD45 <sup>+</sup> CD7 <sup>-</sup> HLA-DR <sup>+</sup> CD14 <sup>low</sup> CD16 <sup>-</sup> CD11c <sup>+</sup> CD19 <sup>-</sup> CD163 <sup>+</sup>                                    |
| 19_CD8 T                       | CD45 <sup>+</sup> CD3 <sup>+</sup> CD8a <sup>+</sup> CD4 <sup>-</sup>                                                                            |                                                                                                                                                                                         |
| 20,21_Plasma                   | CD45 <sup>+</sup> EpCAM <sup>-</sup> CD3 <sup>-</sup> HLA-DR <sup>-</sup> CD7 <sup>-</sup> CD19 <sup>-</sup> CD38 <sup>+</sup>                   |                                                                                                                                                                                         |
| Epithelial                     | E-cadherin <sup>+</sup> CD45 <sup>-</sup> CD31 <sup>-</sup>                                                                                      |                                                                                                                                                                                         |
| Epithelial CD68 <sup>+</sup>   | E-cadherin <sup>+</sup> CD68 <sup>+</sup> CD3 <sup>-</sup> CD163 <sup>-</sup>                                                                    |                                                                                                                                                                                         |
| Epithelial HLA-DR <sup>+</sup> | E-cadherin <sup>+</sup> HLA-DR <sup>+</sup> CD3 <sup>-</sup> CD163 <sup>-</sup>                                                                  |                                                                                                                                                                                         |



|                                |                                                                                                                 |                                                                                                                                                                            |
|--------------------------------|-----------------------------------------------------------------------------------------------------------------|----------------------------------------------------------------------------------------------------------------------------------------------------------------------------|
| CODEX supervised               | Epithelial cycling                                                                                              | E-cadherin <sup>+</sup> Ki67 <sup>+</sup>                                                                                                                                  |
|                                | Endothelial                                                                                                     | CD31 <sup>+</sup> E-cadherin <sup>-</sup> CD45 <sup>-</sup>                                                                                                                |
|                                | Stromal fibroblast CD44 <sup>+</sup>                                                                            | Vimentin <sup>+</sup> CD44 <sup>+</sup> CD45 <sup>-</sup> CD31 <sup>-</sup> CD20 <sup>-</sup> CD14 <sup>-</sup> CD3 <sup>-</sup> E-cadherin <sup>-</sup> PDPN <sup>-</sup> |
|                                | Stromal pericytes myofibroblasts                                                                                | Vimentin <sup>+</sup> SMA <sup>+</sup> Collagen IV <sup>+</sup>                                                                                                            |
|                                | Stromal fibroblast PDPN <sup>+</sup>                                                                            | Vimentin <sup>+</sup> PDPN <sup>+</sup> CD45 <sup>-</sup> CD31 <sup>-</sup> CD20 <sup>-</sup> CD14 <sup>-</sup> CD3 <sup>-</sup> E-cadherin <sup>-</sup> CD44 <sup>-</sup> |
|                                | Hematopoietic                                                                                                   | CD45 <sup>+</sup> E-cadherin <sup>-</sup> CD31 <sup>-</sup>                                                                                                                |
|                                | CD45 <sup>+</sup>                                                                                               | CD45 <sup>+</sup>                                                                                                                                                          |
|                                | Monocyte                                                                                                        | CD45 <sup>+</sup> HLA-DR <sup>+</sup> CD3 <sup>-</sup> CD163 <sup>-</sup> CD20 <sup>-</sup> CD14 <sup>+</sup> CD68 <sup>+</sup>                                            |
|                                | Macrophages                                                                                                     | CD45 <sup>+</sup> HLA-DR <sup>+</sup> CD3 <sup>-</sup> CD163 <sup>+</sup>                                                                                                  |
|                                | B                                                                                                               | CD45 <sup>+</sup> HLA-DR <sup>+</sup> CD20 <sup>+</sup> CD3 <sup>-</sup> E-cadherin <sup>-</sup> CD163 <sup>-</sup>                                                        |
|                                | T                                                                                                               | CD45 <sup>+</sup> CD3 <sup>+</sup> E-cadherin <sup>-</sup>                                                                                                                 |
|                                | CD4 <sup>+</sup> T                                                                                              | CD45 <sup>+</sup> CD3 <sup>+</sup> CD4 <sup>+</sup> CD8 <sup>-</sup>                                                                                                       |
|                                | CD8 <sup>+</sup> T                                                                                              | CD45 <sup>+</sup> CD3 <sup>+</sup> CD4 <sup>-</sup> CD8 <sup>+</sup>                                                                                                       |
| Memory CD4 <sup>+</sup> T      | CD45 <sup>+</sup> CD8 <sup>-</sup> CD3 <sup>+</sup> CD4 <sup>+</sup> CD45RO <sup>+</sup>                        |                                                                                                                                                                            |
| Memory CD8 <sup>+</sup> T      | CD45 <sup>+</sup> CD4 <sup>-</sup> CD3 <sup>+</sup> CD8 <sup>+</sup> CD45RO <sup>+</sup>                        |                                                                                                                                                                            |
| CODEX unsupervised             | 1_B                                                                                                             | CD45 <sup>+</sup> HLA-DR <sup>+</sup> CD19 <sup>+</sup> CD20 <sup>+</sup>                                                                                                  |
|                                | 2_Endothelial                                                                                                   | E-cadherin <sup>-</sup> CD45 <sup>-</sup> CD31 <sup>+</sup>                                                                                                                |
|                                | 3_Epithelial                                                                                                    | E-cadherin <sup>+</sup> PCK <sup>+</sup> CD45 <sup>-</sup> CD31 <sup>-</sup>                                                                                               |
|                                | 4_Epithelial CD68 <sup>+</sup>                                                                                  | E-cadherin <sup>+</sup> PCK <sup>+</sup> CD68 <sup>+</sup>                                                                                                                 |
|                                | 5_Epithelial cycling                                                                                            | E-cadherin <sup>+</sup> PCK <sup>+</sup> Ki67 <sup>+</sup>                                                                                                                 |
|                                | 6_Macrophages                                                                                                   | CD45 <sup>+</sup> HLA-DR <sup>+</sup> CD163 <sup>+</sup>                                                                                                                   |
|                                | 7_Memory T                                                                                                      | CD45 <sup>+</sup> CD3 <sup>+</sup> CD45RO <sup>+</sup>                                                                                                                     |
|                                | 8_Stromal fibroblast CD44 <sup>+</sup>                                                                          | Vimentin <sup>+</sup> CD44 <sup>+</sup> CD45 <sup>-</sup> CD3 <sup>-</sup> E-cadherin <sup>-</sup>                                                                         |
|                                | 9_Stromal pericytes myofibroblast                                                                               | Vimentin <sup>+</sup> SMA <sup>+</sup> Collagen IV <sup>+</sup>                                                                                                            |
|                                | 10_Stromal fibroblast PDPN <sup>+</sup>                                                                         | Vimentin <sup>+</sup> PDPN <sup>+</sup> CD45 <sup>-</sup> CD3 <sup>-</sup> E-cadherin <sup>-</sup>                                                                         |
|                                | 11_T CD45RO <sup>-</sup>                                                                                        | CD45 <sup>+</sup> CD3 <sup>+</sup> CD45RO <sup>-</sup>                                                                                                                     |
| MIBI supervised                | Hematopoietic                                                                                                   | CD45 <sup>+</sup> EpCAM <sup>-</sup> CD31 <sup>-</sup>                                                                                                                     |
|                                | Epithelial                                                                                                      | EpCAM <sup>+</sup> CD45 <sup>-</sup> CD31 <sup>-</sup>                                                                                                                     |
|                                | Epithelial HLA-DR <sup>+</sup>                                                                                  | EpCAM <sup>+</sup> HLA-DR <sup>+</sup>                                                                                                                                     |
|                                | Endothelial                                                                                                     | CD31 <sup>+</sup> EpCAM <sup>-</sup> CD45 <sup>-</sup>                                                                                                                     |
|                                | Stromal                                                                                                         | Vimentin <sup>+</sup> EpCAM <sup>-</sup> CD45 <sup>-</sup> CD31 <sup>-</sup>                                                                                               |
|                                | T                                                                                                               | CD45 <sup>+</sup> CD3 <sup>+</sup>                                                                                                                                         |
|                                | CD4 <sup>+</sup> T                                                                                              | CD45 <sup>+</sup> CD3 <sup>+</sup> CD4 <sup>+</sup> CD8a <sup>-</sup>                                                                                                      |
|                                | CD8 <sup>+</sup> T                                                                                              | CD45 <sup>+</sup> CD3 <sup>+</sup> CD4 <sup>-</sup> CD8a <sup>+</sup>                                                                                                      |
|                                | Memory CD4 <sup>+</sup> T                                                                                       | CD45 <sup>+</sup> CD8 <sup>-</sup> CD3 <sup>+</sup> CD4 <sup>+</sup> CD45RO <sup>+</sup>                                                                                   |
|                                | Memory CD8 <sup>+</sup> T                                                                                       | CD45 <sup>+</sup> CD4 <sup>-</sup> CD3 <sup>+</sup> CD8 <sup>+</sup> CD45RO <sup>+</sup>                                                                                   |
|                                | Neutrophils                                                                                                     | CD45 <sup>+</sup> EpCAM <sup>-</sup> CD3 <sup>-</sup> CD20 <sup>-</sup> CD16 <sup>+</sup> CD56 <sup>-</sup> HLA-DR <sup>-</sup>                                            |
|                                | B                                                                                                               | CD45 <sup>+</sup> CD3 <sup>-</sup> HLA-DR <sup>+</sup> CD20 <sup>+</sup>                                                                                                   |
|                                | Plasma                                                                                                          | CD45 <sup>+</sup> CD3 <sup>-</sup> CD20 <sup>-</sup> CD138 <sup>+</sup>                                                                                                    |
|                                | mDC                                                                                                             | EpCAM <sup>-</sup> CD45 <sup>+</sup> CD3 <sup>-</sup> CD20 <sup>-</sup> CD11c <sup>+</sup>                                                                                 |
|                                | Mast                                                                                                            | EpCAM <sup>-</sup> CD45 <sup>+</sup> CD3 <sup>-</sup> CD20 <sup>-</sup> CD117 <sup>+</sup>                                                                                 |
| Monocytes                      | HLA-DR <sup>+</sup> CD163 <sup>-</sup> CD3 <sup>-</sup> CD20 <sup>-</sup> CD14 <sup>+</sup> CD68 <sup>+</sup>   |                                                                                                                                                                            |
| Macrophages                    | CD163 <sup>+</sup> CD68 <sup>+</sup> CD3 <sup>-</sup>                                                           |                                                                                                                                                                            |
| Macrophages CD103 <sup>+</sup> | CD163 <sup>+</sup> CD3 <sup>-</sup> CD68 <sup>+</sup> CD103 <sup>+</sup>                                        |                                                                                                                                                                            |
| Fibroblasts                    | CD45 <sup>-</sup> EpCAM <sup>-</sup> CD31 <sup>-</sup> Vimentin <sup>+</sup> CD56 <sup>-</sup>                  |                                                                                                                                                                            |
| Myofibroblasts                 | CD45 <sup>-</sup> EpCAM <sup>-</sup> CD31 <sup>-</sup> Vimentin <sup>+</sup> SMA <sup>+</sup> CD56 <sup>-</sup> |                                                                                                                                                                            |

**Supplementary Table 4. Cell subset phenotypes for supervised and unsupervised analyses for each multi-omics method.**

| Cell type       | Gene list       | Numeric ID     |
|-----------------|-----------------|----------------|
| MNP-pDC         | <i>HLA-DRA</i>  | 8118548        |
|                 | <i>CD74</i>     | 8115147        |
|                 | <i>HLA-DRB1</i> | 8125445        |
|                 | <i>CST3</i>     | 8065403        |
|                 | <i>LYZ</i>      | 7957023        |
|                 | <i>HLA-DPA1</i> | 8125556        |
|                 | <i>GZMB</i>     | 7978366        |
|                 | <i>ITM2C</i>    | 8048995        |
|                 | <i>SEC61B</i>   | 8156838        |
|                 | <i>IRF1</i>     | 8114010        |
|                 | <i>LILRA4</i>   | 8039246        |
|                 | <i>APP</i>      | 8069644        |
|                 | <i>C12orf75</i> | 7958253        |
|                 | <i>PPP1R14B</i> | 7949060        |
|                 | <i>JCHAIN</i>   | 8100827        |
|                 | <i>TCF4</i>     | 8023415        |
|                 | <i>UGCG</i>     | 8157216        |
|                 | <i>ALOX5AP</i>  | 7968344        |
|                 | <i>SERPINF1</i> | 8003667        |
| <i>CCDC50</i>   | 8084818         |                |
| MNP-Monocytes   | <i>HLA-DRA</i>  | 8118548        |
|                 | <i>CD74</i>     | 8115147        |
|                 | <i>HLA-DRB1</i> | 8125445        |
|                 | <i>CST3</i>     | 8065403        |
|                 | <i>LYZ</i>      | 7957023        |
|                 | <i>HLA-DPA1</i> | 8125556        |
|                 | <i>S100A9</i>   | 7905571        |
|                 | <i>S100A8</i>   | 7920244        |
|                 | <i>TIMP1</i>    | 8167185        |
|                 | <i>FCN1</i>     | 8165011        |
|                 | <i>SERPINA1</i> | 7981068        |
|                 | <i>S100A4</i>   | 7920271        |
|                 | <i>LILRA5</i>   | 8039236        |
|                 | <i>S100A6</i>   | 7920258        |
|                 | <i>TYMP</i>     | 8077103        |
|                 | <i>VCAN</i>     | 8106743        |
|                 | <i>SOD2</i>     | 8130556        |
|                 | <i>CD44</i>     | 7939341        |
|                 | <i>CD14</i>     | 8114612        |
| <i>EREG</i>     | 8095728         |                |
| <i>TSPO</i>     | 8073612         |                |
| MNP-Macrophage  | <i>HLA-DRA</i>  | 8118548        |
|                 | <i>CD74</i>     | 8115147        |
|                 | <i>HLA-DRB1</i> | 8125445        |
|                 | <i>CST3</i>     | 8065403        |
|                 | <i>LYZ</i>      | 7957023        |
|                 | <i>HLA-DPA1</i> | 8125556        |
|                 | <i>C1QA</i>     | 7898793        |
|                 | <i>FTL</i>      | 8030171        |
|                 | <i>C1QC</i>     | 7898799        |
|                 | <i>C1QB</i>     | 7898805        |
|                 | <i>ITM2B</i>    | 7969003        |
|                 | <i>NPC2</i>     | 7980146        |
|                 | <i>SLC40A1</i>  | 8057677        |
|                 | <i>CCL3</i>     | 8014369        |
|                 | <i>MS4A7</i>    | 7940259        |
|                 | <i>CTSS</i>     | 7919800        |
|                 | <i>FCGRT</i>    | 8030374        |
|                 | <i>CCL4</i>     | 8006602        |
|                 | MNP-mDC         | <i>HLA-DRA</i> |
| <i>CD74</i>     |                 | 8115147        |
| <i>HLA-DRB1</i> |                 | 8125445        |
| <i>CST3</i>     |                 | 8065403        |
| <i>LYZ</i>      |                 | 7957023        |
| <i>HLA-DPA1</i> |                 | 8125556        |
| <i>BASP1</i>    |                 | 8104601        |
| <i>SLC38A1</i>  |                 | 7962516        |
| <i>LTB</i>      |                 | 8124950        |
| <i>CST7</i>     |                 | 8061416        |
| <i>CD1C</i>     |                 | 7906348        |
| <i>ACAP1</i>    |                 | 8004331        |
| <i>DAPP1</i>    |                 | 8096602        |
| <i>STK17A</i>   |                 | 8132503        |
| <i>ADAM8</i>    |                 | 7937150        |
| <i>FCER1A</i>   |                 | 7906443        |
| <i>RHOF</i>     |                 | 7967202        |
| <i>FSCN1</i>    |                 | 8131339        |
| <i>ICAM3</i>    |                 | 8033987        |
| <i>CD86</i>     | 7896700         |                |
| <i>CXCR4</i>    | 8055465         |                |
| <i>COL6A2</i>   | 8069301         |                |
| <i>CXCL14</i>   | 8114249         |                |
| <i>CALD1</i>    | 8136347         |                |
| <i>COL3A1</i>   | 8046922         |                |

|                              |                  |               |         |
|------------------------------|------------------|---------------|---------|
|                              | <i>IGFBP7</i>    | 8100541       |         |
|                              | <i>C11orf96</i>  | 7939492       |         |
|                              | <i>TIMP1</i>     | 8167185       |         |
|                              | <i>MMP3</i>      | 7951284       |         |
| Stromal-Activated Fibroblast | <i>MMP1</i>      | 7951271       |         |
|                              | <i>AREG</i>      | 8095736       |         |
|                              | <i>TMEM158</i>   | 8086530       |         |
|                              | <i>TNFRSF11B</i> | 8152512       |         |
|                              | <i>ACSL4</i>     | 8174474       |         |
|                              | <i>PLAU</i>      | 7928429       |         |
|                              | <i>HGF</i>       | 8140556       |         |
|                              | <i>STC1</i>      | 8149825       |         |
|                              | <i>GJA1</i>      | 8121749       |         |
|                              | <i>CD82</i>      | 7939546       |         |
|                              | <i>ISG20</i>     | 7985777       |         |
|                              | <i>NRG1</i>      | 8145766       |         |
|                              | <hr/>            |               |         |
|                              |                  | <i>COL6A2</i> | 8069301 |
|                              | <i>CXCL14</i>    | 8114249       |         |
|                              | <i>CALD1</i>     | 8136347       |         |
|                              | <i>COL3A1</i>    | 8046922       |         |
|                              | <i>IGFBP7</i>    | 8100541       |         |
|                              | <i>C11orf96</i>  | 7939492       |         |
|                              | <i>F3</i>        | 7917875       |         |
|                              | <i>POSTN</i>     | 7971077       |         |
| Stromal S2                   | <i>ENHO</i>      | 8160816       |         |
|                              | <i>PDGFRA</i>    | 8095080       |         |
|                              | <i>SOX6</i>      | 7946757       |         |
|                              | <i>PLAT</i>      | 8150509       |         |
|                              | <i>NSG1</i>      | 8093839       |         |
|                              | <i>HSD17B2</i>   | 7997491       |         |
|                              | <i>DDHD1</i>     | 7979223       |         |
|                              | <i>PDGFD</i>     | 7951351       |         |
|                              | <i>AGT</i>       | 7924987       |         |
|                              | <i>WNT5B</i>     | 7953012       |         |
|                              | <hr/>            |               |         |
|                              | <i>IGFBP7</i>    | 8100541       |         |
|                              | <i>PLVAP</i>     | 8035297       |         |
|                              | <i>SPARCL1</i>   | 8101659       |         |
|                              | <i>IFITM3</i>    | 7945371       |         |
|                              | <i>IGFBP4</i>    | 8007100       |         |
|                              | <i>CAV1</i>      | 8135594       |         |
|                              | <i>CCL21</i>     | 8160889       |         |
|                              | <i>TFE3</i>      | 8070567       |         |
|                              | <i>TFP1</i>      | 8057599       |         |
|                              | <i>NUPR1</i>     | 8000574       |         |
|                              | <i>MMRN1</i>     | 8096415       |         |
|                              | <i>PROX1</i>     | 7909681       |         |
|                              | <i>LYVE1</i>     | 7946579       |         |
|                              | <i>AKAP12</i>    | 8122807       |         |
|                              | <i>TBX1</i>      | 8071276       |         |
|                              | <i>FABP4</i>     | 8151532       |         |
|                              | <i>PPFIBP1</i>   | 7954559       |         |
|                              | <i>RBP1</i>      | 8091078       |         |
|                              | <i>EFEMP1</i>    | 8052355       |         |
|                              | <i>NR2F1</i>     | 8106923       |         |
|                              | <i>ACKR1</i>     | 7906435       |         |
|                              | <i>NPC2</i>      | 7980146       |         |
|                              | <i>CPE</i>       | 8098204       |         |
| Endothelial                  | <i>CLU</i>       | 8149927       |         |
|                              | <i>MADCAM1</i>   | 8023941       |         |
|                              | <i>DUSP23</i>    | 7906469       |         |
|                              | <i>IL1R1</i>     | 8043995       |         |
|                              | <i>ZNF385D</i>   | 8085774       |         |
|                              | <i>KCTD12</i>    | 7972055       |         |
|                              | <i>IL33</i>      | 8154295       |         |
|                              | <i>ADGRG6</i>    | 8122365       |         |
|                              | <i>LPCAT4</i>    | 7987230       |         |
|                              | <i>SELP</i>      | 7922200       |         |
|                              | <i>CTNNA1</i>    | 8163063       |         |
|                              | <i>TLL1</i>      | 8098214       |         |
|                              | <i>GSN</i>       | 8157582       |         |
|                              | <i>SLC9A3R2</i>  | 7992463       |         |
|                              | <i>NOTCH4</i>    | 8125383       |         |
|                              | <i>RGCC</i>      | 7968789       |         |
|                              | <i>A2M</i>       | 7960947       |         |
|                              | <i>MGLL</i>      | 8090433       |         |
|                              | <i>VAMP5</i>     | 8043203       |         |
|                              | <i>FLT1</i>      | 7970763       |         |
|                              | <i>TSC22D1</i>   | 7971350       |         |
|                              | <i>RBP7</i>      | 7897522       |         |
|                              | <i>ADGRF5</i>    | 8126798       |         |
|                              | <i>ADGRL4</i>    | 7917182       |         |
|                              | <i>SRGN</i>      | 7927964       |         |
|                              | <hr/>            |               |         |
|                              |                  | <i>IL7R</i>   | 8104901 |
|                              |                  | <i>CD3E</i>   | 7944179 |
|                              |                  | <i>ARL4C</i>  | 8059854 |
|                              |                  | <i>KLRB1</i>  | 7961059 |

|                      |                 |         |
|----------------------|-----------------|---------|
|                      | <i>SPOCK2</i>   | 7934215 |
|                      | <i>KLF2</i>     | 8026564 |
|                      | <i>SELL</i>     | 7896687 |
|                      | <i>LEF1</i>     | 8102232 |
|                      | <i>CCR7</i>     | 8015031 |
|                      | <i>C1orf162</i> | 7903980 |
|                      | <i>LYPD3</i>    | 8037301 |
|                      | <i>ACTN1</i>    | 7979824 |
|                      | <i>TRABD2A</i>  | 8053379 |
| CD4 T                | <i>GCNT4</i>    | 8112668 |
|                      | <i>SLC40A1</i>  | 8057677 |
|                      | <i>FHIT</i>     | 8088458 |
|                      | <i>FAM117B</i>  | 8047565 |
|                      | <i>S100A4</i>   | 7920271 |
|                      | <i>JUN</i>      | 7916609 |
|                      | <i>CCL5</i>     | 8014316 |
|                      | <i>TNFAIP3</i>  | 8122265 |
|                      | <i>ANXA1</i>    | 8155849 |
|                      | <i>ANKRD28</i>  | 8085628 |
|                      | <i>ID2</i>      | 8040103 |
|                      | <i>EGR1</i>     | 8108370 |
|                      | <i>GPR65</i>    | 7976080 |
|                      | <i>LGALS3</i>   | 7974461 |
|                      | <i>HOPX</i>     | 8100507 |
|                      | <i>IL7R</i>     | 8104901 |
|                      | <i>CD3E</i>     | 7944179 |
|                      | <i>ARL4C</i>    | 8059854 |
|                      | <i>KLRB1</i>    | 7961059 |
|                      | <i>SPOCK2</i>   | 7934215 |
|                      | <i>CTLA4</i>    | 8047692 |
|                      | <i>TIGIT</i>    | 8081799 |
|                      | <i>MAF</i>      | 8002969 |
|                      | <i>ARID5B</i>   | 7927732 |
| T reg                | <i>BATF</i>     | 7975793 |
|                      | <i>TBC1D4</i>   | 7972021 |
|                      | <i>PHACTR2</i>  | 8122426 |
|                      | <i>RNF19A</i>   | 8152041 |
|                      | <i>TNFRSF4</i>  | 7911413 |
|                      | <i>UCP2</i>     | 7950307 |
|                      | <i>ICA1</i>     | 8138202 |
|                      | <i>TNFRSF1B</i> | 7896721 |
|                      | <i>TNFRSF18</i> | 7911403 |
|                      | <i>DUSP4</i>    | 8150076 |
|                      | <i>TOX2</i>     | 8062782 |
|                      | <i>CCL5</i>     | 8014316 |
|                      | <i>NKG7</i>     | 8038809 |
|                      | <i>GZMA</i>     | 8105340 |
|                      | <i>IL32</i>     | 7992828 |
|                      | <i>CCL4</i>     | 8006602 |
|                      | <i>CD7</i>      | 8019478 |
|                      | <i>GZMK</i>     | 8105331 |
|                      | <i>ITGB2</i>    | 8070826 |
|                      | <i>GZMH</i>     | 7978360 |
|                      | <i>KLF2</i>     | 8026564 |
| Cytotoxic lymphocyte | <i>KLRG1</i>    | 7953835 |
|                      | <i>KLRB1</i>    | 7961059 |
|                      | <i>SPRY1</i>    | 8097282 |
|                      | <i>CMC1</i>     | 8078312 |
|                      | <i>SH2D1A</i>   | 8169792 |
|                      | <i>HCST</i>     | 8028104 |
|                      | <i>SH3BGRL3</i> | 7899153 |
|                      | <i>KLRD1</i>    | 7953949 |
|                      | <i>CD3E</i>     | 7944179 |
|                      | <i>CD3D</i>     | 7952056 |
|                      | <i>CD69</i>     | 7896693 |
|                      | <i>CD3G</i>     | 7944185 |
|                      | <i>CD8A</i>     | 8053584 |
|                      | <i>CD74</i>     | 8115147 |
|                      | <i>HLA-DRA</i>  | 8118548 |
|                      | <i>MS4A1</i>    | 7940287 |
|                      | <i>HLA-DRB1</i> | 8125445 |
|                      | <i>HLA-DPA1</i> | 8125556 |
|                      | <i>CD79A</i>    | 8029136 |
|                      | <i>IGHM</i>     | 7896697 |
|                      | <i>TCL1A</i>    | 7981183 |
|                      | <i>FCER2</i>    | 8033420 |
|                      | <i>YBX3</i>     | 7961230 |
|                      | <i>KLF4</i>     | 8163002 |
|                      | <i>KLF6</i>     | 7931810 |
|                      | <i>GPR183</i>   | 7972557 |
| B                    | <i>TNFSF9</i>   | 8025053 |
|                      | <i>CD27</i>     | 7953333 |
|                      | <i>LDLRAD4</i>  | 8020308 |
|                      | <i>ACTG1</i>    | 8019183 |
|                      | <i>GAPDH</i>    | 7953385 |
|                      | <i>BASP1</i>    | 8104601 |

|                                |                 |         |
|--------------------------------|-----------------|---------|
|                                | <i>PFN1</i>     | 8011759 |
|                                | <i>HMGN1</i>    | 8070389 |
|                                | <i>YBX1</i>     | 7900585 |
|                                | <i>LCP1</i>     | 7971461 |
|                                | <i>SLC25A5</i>  | 8169640 |
|                                | <i>ARPC1B</i>   | 8134552 |
|                                | <i>ANP32B</i>   | 8156750 |
|                                | <i>ACTR3</i>    | 8044686 |
|                                | <i>MARCKSL1</i> | 7914525 |
| Plasma                         | <i>JCHAIN</i>   | 8100827 |
|                                | <i>MZB1</i>     | 8114511 |
|                                | <i>SSR4</i>     | 8170775 |
|                                | <i>CD79A</i>    | 8029136 |
|                                | <i>IGHM</i>     | 7896697 |
|                                | <i>CD44</i>     | 7939341 |
|                                | <i>CD9</i>      | 7953291 |
|                                | <i>CD48</i>     | 7921667 |
|                                | <i>THY1</i>     | 7952268 |
|                                | <i>LAG3</i>     | 7953418 |
| Epithelial                     | <i>LGALS4</i>   | 8036591 |
|                                | <i>PIGR</i>     | 7923929 |
|                                | <i>KRT8</i>     | 7963567 |
|                                | <i>C15orf48</i> | 7983478 |
|                                | <i>SH2D6</i>    | 8043157 |
|                                | <i>TRPM5</i>    | 7945742 |
|                                | <i>TLE4</i>     | 8156060 |
|                                | <i>FABP1</i>    | 8053654 |
|                                | <i>AQP8</i>     | 7994252 |
|                                | <i>SLC26A3</i>  | 8142171 |
|                                | <i>GUCA2A</i>   | 7915404 |
|                                | <i>CEACAM7</i>  | 8037053 |
|                                | <i>SLC26A2</i>  | 8109194 |
|                                | <i>OTOP2</i>    | 8009705 |
|                                | <i>BEST4</i>    | 7915598 |
|                                | <i>CA4</i>      | 8008900 |
|                                | <i>OLFM4</i>    | 7969288 |
|                                | <i>LEFTY1</i>   | 7924663 |
|                                | <i>PTGDR</i>    | 7974363 |
|                                | <i>UBE2C</i>    | 8063043 |
| <i>HMGN2</i>                   | 7899187         |         |
| <i>TOP2A</i>                   | 8014974         |         |
| <i>HMGB2</i>                   | 8103728         |         |
| <i>TUBA1B</i>                  | 7963046         |         |
| Neutrophil                     | <i>S100A8</i>   | 7920244 |
|                                | <i>S100A9</i>   | 7905571 |
|                                | <i>FCGR3A</i>   | 7921868 |
|                                | <i>FCGR3B</i>   | 7921873 |
|                                | <i>IL1R2</i>    | 8043981 |
|                                | <i>GCA</i>      | 8046003 |
|                                | <i>CSF3R</i>    | 7914950 |
|                                | <i>S100P</i>    | 8093950 |
|                                | <i>BASP1</i>    | 8104601 |
|                                | <i>FPR1</i>     | 8038899 |
|                                | <i>IFITM2</i>   | 7937330 |
|                                | <i>ELANE</i>    | 8024956 |
| Pre-VDZ response signature     | <i>GAS6</i>     | 7970329 |
|                                | <i>LEFTY1</i>   | 7924663 |
|                                | <i>STMN1</i>    | 7913864 |
|                                | <i>RPL37</i>    | 8111814 |
|                                | <i>MARCKSL1</i> | 7914525 |
|                                | <i>NUPR1</i>    | 8000574 |
|                                | <i>GSTP1</i>    | 7941936 |
|                                | <i>LYZ</i>      | 7957023 |
|                                | <i>SPINK1</i>   | 8114964 |
|                                | <i>AGR2</i>     | 8138381 |
| Pre-VDZ non-response signature | <i>OLFM4</i>    | 7969288 |
|                                | <i>JCHAIN</i>   | 8100827 |
|                                | <i>REG1A</i>    | 8042986 |
|                                | <i>MMP2</i>     | 7995681 |
|                                | <i>THBS1</i>    | 7982597 |
|                                | <i>MMP1</i>     | 7951271 |
|                                | <i>TCL1A</i>    | 7981183 |
|                                | <i>COL21A1</i>  | 8127201 |
|                                | <i>SPP1</i>     | 8096301 |
|                                | <i>ITGA5</i>    | 7963786 |
| <i>HGF</i>                     | 8140556         |         |
| <i>GZMK</i>                    | 8105331         |         |
| <i>GZMH</i>                    | 7978360         |         |
| <i>IFNG</i>                    | 7964787         |         |

**Supplementary Table 5. Cell subset-specific gene signatures used for Gene Set Enrichment Analysis (GSEA).** Numeric ID, Affymetrix numeric probe identifier corresponding to each gene.

| Assay type          | Patient ID | Specimen/Imaged | Number of cells | % of hematopoietic | % of Stromal and Endothelial | % IEC | Multi-omic method                        |
|---------------------|------------|-----------------|-----------------|--------------------|------------------------------|-------|------------------------------------------|
| CITE-seq            | HS1        | Blood           | 899             |                    |                              |       | single cell transcriptomic and proteomic |
|                     | HS2        | Blood           | 3120            |                    |                              |       |                                          |
|                     | HS3        | Blood           | 1699            |                    |                              |       |                                          |
|                     | HS4        | Blood           | 1761            |                    |                              |       |                                          |
|                     | HS5        | N/A             | N/A             |                    |                              |       |                                          |
|                     | HS6        | Blood           | 3474            |                    |                              |       |                                          |
|                     | HS7        | Blood           | 2356            |                    |                              |       |                                          |
|                     | HS8        | Blood           | 1111            |                    |                              |       |                                          |
|                     | HS9        | Blood           | 1473            |                    |                              |       |                                          |
|                     | HS10       | Blood           | 1669            |                    |                              |       |                                          |
|                     | HS11       | Blood           | 1003            |                    |                              |       |                                          |
|                     | HS12       | Blood           | 1565            |                    |                              |       |                                          |
|                     | HS1        | Biopsy          | 9572            | 87.4               | 3.9                          | 7.7   |                                          |
|                     | HS2        | Biopsy          | 2648            | 85.7               | 5.4                          | 8.3   |                                          |
|                     | HS3        | Biopsy          | 8256            | 88.6               | 7.4                          | 2.8   |                                          |
|                     | HS4        | Biopsy          | 13662           | 77.8               | 10.5                         | 10.7  |                                          |
|                     | HS5        | Biopsy          | 6103            | 75.2               | 15.9                         | 7.8   |                                          |
|                     | HS6        | Biopsy          | 9036            | 70.2               | 22.2                         | 6.3   |                                          |
|                     | HS7        | Biopsy          | 9548            | 88.2               | 3.0                          | 7.9   |                                          |
|                     | HS8        | Biopsy          | 6076            | 79.1               | 15.8                         | 4.3   |                                          |
|                     | HS9        | Biopsy          | 4393            | 67.4               | 8.7                          | 23.0  |                                          |
|                     | HS10       | Biopsy          | 9192            | 80.6               | 5.7                          | 13.3  |                                          |
|                     | HS11       | Biopsy          | 7072            | 86.1               | 5.2                          | 6.1   |                                          |
|                     | HS12       | Biopsy          | 8342            | 78.9               | 10.8                         | 9.6   |                                          |
| CyTOF               | HS1        | Blood           | 57374           |                    |                              |       | single cell proteomic                    |
|                     | HS2        | Blood           | 136673          |                    |                              |       |                                          |
|                     | HS3        | Blood           | 167045          |                    |                              |       |                                          |
|                     | HS4        | Blood           | 151381          |                    |                              |       |                                          |
|                     | HS5        | N/A             | N/A             |                    |                              |       |                                          |
|                     | HS6        | Blood           | 75079           |                    |                              |       |                                          |
|                     | HS7        | Blood           | 162640          |                    |                              |       |                                          |
|                     | HS8        | Blood           | 121482          |                    |                              |       |                                          |
|                     | HS9        | Blood           | 139270          |                    |                              |       |                                          |
|                     | HS10       | Blood           | 85768           |                    |                              |       |                                          |
|                     | HS11       | Blood           | 176299          |                    |                              |       |                                          |
|                     | HS12       | Blood           | 117145          |                    |                              |       |                                          |
|                     | HS1        | Biopsy          | 82382           | 16.6               | 6.1                          | 76.4  |                                          |
|                     | HS2        | Biopsy          | 83878           | 17.1               | 4.7                          | 76.7  |                                          |
|                     | HS3        | Biopsy          | 82480           | 32.0               | 8.9                          | 57.7  |                                          |
|                     | HS4        | Biopsy          | 57637           | 25.7               | 9.7                          | 63.2  |                                          |
|                     | HS5        | Biopsy          | 50659           | 26.7               | 9.4                          | 62.9  |                                          |
|                     | HS6        | Biopsy          | 30428           | 52.1               | 17.3                         | 28.7  |                                          |
|                     | HS7        | Biopsy          | 59387           | 34.6               | 5.6                          | 57.2  |                                          |
|                     | HS8        | Biopsy          | 41843           | 31.9               | 16.4                         | 50.3  |                                          |
|                     | HS9        | Biopsy          | 78302           | 18.0               | 7.0                          | 74.1  |                                          |
|                     | HS10       | Biopsy          | 25923           | 10.6               | 6.6                          | 80.9  |                                          |
|                     | HS11       | Biopsy          | 75650           | 33.8               | 7.4                          | 57.7  |                                          |
|                     | HS12       | Biopsy          | 15680           | 16.8               | 10.0                         | 71.8  |                                          |
| Multiplexed RNA-ISH | HS1        | Core            | 8816            | 4.2                | 3.8                          | 57.0  | FFPE spatial transcriptomic              |
|                     | HS2        | Core            | 10198           | 4.3                | 8.1                          | 58.2  |                                          |
|                     | HS3        | Core            | 6314            | 6.5                | 19.0                         | 61.0  |                                          |
|                     | HS4        | Core            | 5091            | 5.5                | 24.9                         | 47.5  |                                          |
|                     | HS5        | Core            | 8490            | 8.8                | 15.4                         | 49.4  |                                          |
|                     | HS6        | Core            | 8868            | 12.4               | 18.0                         | 48.9  |                                          |
|                     | HS7        | Core            | 5779            | 7.2                | 10.3                         | 55.4  |                                          |
|                     | HS8        | Core            | 5365            | 13.1               | 13.0                         | 37.1  |                                          |
|                     | HS9        | Core            | 10212           | 22.9               | 8.7                          | 57.9  |                                          |
|                     | HS10       | Core            | 6975            | 24.5               | 8.4                          | 55.3  |                                          |
|                     | HS11       | Core            | 13223           | 33.2               | 25.1                         | 41.0  |                                          |
|                     | HS12       | Core            | 14161           | 10.6               | 20.8                         | 55.0  |                                          |
| CosMx SMI 960-plex  | HS1        | FOV             | 5131            | 30.6               | 14.3                         | 55.2  | FFPE spatial transcriptomic              |
|                     | HS2        | FOV             | 6021            | 27.7               | 9.4                          | 62.9  |                                          |
|                     | HS3        | FOV             | 1353            | 50.2               | 11.2                         | 38.6  |                                          |
|                     | HS4        | FOV             | 4262            | 16.9               | 15.1                         | 68.0  |                                          |
|                     | HS5        | FOV             | 3774            | 32.8               | 16.4                         | 50.8  |                                          |
|                     | HS6        | FOV             | N/A             |                    |                              |       |                                          |
|                     | HS7        | FOV             | 4451            | 35.1               | 20.8                         | 44.1  |                                          |
|                     | HS8        | FOV             | 4888            | 68.7               | 23.6                         | 7.7   |                                          |
|                     | HS9        | FOV             | N/A             |                    |                              |       |                                          |
|                     | HS10       | FOV             | 7765            | 35.7               | 24.0                         | 40.3  |                                          |
|                     | HS11       | FOV             | 6819            | 66.2               | 16.1                         | 17.8  |                                          |
|                     | HS12       | FOV             | 4319            | 33.9               | 27.0                         | 39.1  |                                          |
| CODEX               | HS1        | Core            | N/A             |                    |                              |       | FFPE spatial proteomic                   |
|                     | HS2        | Core            | 10302           | 12.6               | 15.5                         | 49.6  |                                          |
|                     | HS3        | Core            | 3987            | 32.5               | 17.4                         | 29.6  |                                          |
|                     | HS4        | Core            | 3868            | 25.9               | 17.6                         | 17.4  |                                          |
|                     | HS5        | Core            | 3451            | 20.5               | 13.0                         | 47.0  |                                          |
|                     | HS6        | Core            | N/A             |                    |                              |       |                                          |
|                     | HS7        | Core            | 4487            | 13.2               | 19.8                         | 20.1  |                                          |
|                     | HS8        | Core            | 5214            | 39.5               | 20.7                         | 5.2   |                                          |
|                     | HS9        | Core            | 3937            | 15.6               | 14.3                         | 38.9  |                                          |
|                     | HS10       | Core            | 11201           | 26.8               | 24.6                         | 34.7  |                                          |
|                     | HS11       | Core            | 12286           | 52.9               | 16.4                         | 4.5   |                                          |
|                     | HS12       | Core            | 9351            | 32.5               | 21.7                         | 9.2   |                                          |
| MIBI                | HS1        | FOV             | 893             | 10.7               | 23.6                         | 41.9  | FFPE spatial proteomic                   |
|                     | HS2        | FOV             | 1455            | 14.4               | 10.3                         | 45.4  |                                          |
|                     | HS3        | FOV             | 1295            | 7.6                | 6.4                          | 50.1  |                                          |
|                     | HS4        | FOV             | 250             | 2.4                | 8.8                          | 67.2  |                                          |
|                     | HS5        | FOV             | 636             | 10.2               | 18.4                         | 43.4  |                                          |
|                     | HS6        | FOV             | 1630            | 29.9               | 16.0                         | 13.4  |                                          |
|                     | HS7        | FOV             | 349             | 11.0               | 24.2                         | 42.5  |                                          |
|                     | HS8        | FOV             | 473             | 18.8               | 14.8                         | 23.9  |                                          |
|                     | HS9        | FOV             | 1090            | 11.4               | 12.1                         | 40.2  |                                          |
|                     | HS10       | FOV             | 1041            | 4.3                | 10.2                         | 46.5  |                                          |
|                     | HS11       | FOV             | 1732            | 27.7               | 11.8                         | 24.2  |                                          |
|                     | HS12       | FOV             | 1401            | 15.3               | 14.6                         | 32.4  |                                          |

Supplementary Table 6. Cell counts and percentages of hematopoietic, stromal and endothelial, and intestinal epithelial cell (IEC) subsets for each patient biospecimen and multi-omic method.

| Gene               | per FOV    |                |            |            | FOVs as replicates |                |            |            | Biopsies as replicates |                |            |            | Include in gene set |
|--------------------|------------|----------------|------------|------------|--------------------|----------------|------------|------------|------------------------|----------------|------------|------------|---------------------|
|                    | baseMean   | log2FoldChange | p-value    | padj       | baseMean           | log2FoldChange | p-value    | padj       | baseMean               | log2FoldChange | p-value    | padj       |                     |
| <b>upregulated</b> |            |                |            |            |                    |                |            |            |                        |                |            |            |                     |
| KRT20              | 526.97688  | 1.04072071     | 0.06350846 | 0.41395902 | 1053.37471         | 1.829395189    | 0.01106976 | 0.29072685 | 1259.97142             | 1.759530615    | 0.58904936 |            |                     |
| MMP2               | 214.781871 | 0.779233372    | 8.81E-05   | 0.00881248 | 408.395547         | 0.650608071    | 0.02130012 | 0.40684052 | 489.294934             | 0.704799783    | 0.04645766 | 0.64528779 | Yes                 |
| CLDN4              | 759.82305  | 0.745929417    | 0.02768877 | 0.31826169 | 1483.20505         | 1.290087005    | 0.00365172 | 0.20246759 | 1776.28492             | 1.241179209    | 0.04625442 | 0.54436599 |                     |
| TIMP1              | 276.204316 | 0.737634615    | 0.01112788 | 0.20232501 | 508.769011         | 0.667081209    | 0.12191453 | 0.76158335 | 602.95769              | 0.541749624    | 0.25692566 | 0.82642476 |                     |
| PLAC8              | 935.934625 | 0.720560727    | 0.06581948 | 0.41395902 | 1848.43313         | 1.347448175    | 0.00690973 | 0.27583642 | 2314.7905              | 1.208635846    | 0.03799885 | 0.62106315 |                     |
| THBS1              | 344.101653 | 0.672537259    | 0.00119803 | 0.04991792 | 647.142023         | 0.611143584    | 0.02401064 | 0.40684052 | 750.480415             | 0.745730473    | 0.00962025 | 0.40743756 | Yes                 |
| JUN                | 453.634985 | 0.66064794     | 0.00672182 | 0.16894968 | 870.901615         | 0.956538051    | 0.00759029 | 0.28460002 | 1009.87437             | 1.096068642    | NA         | NA         |                     |
| CEACAM1            | 294.859297 | 0.64336382     | 0.03858965 | 0.35695204 | 557.851558         | 1.107380773    | 0.00344384 | 0.20217367 | 673.708459             | 1.040242363    | 0.109342   | 0.48659234 |                     |
| MAL21A             | 5162.4939  | 0.636166653    | 0.01659691 | 0.26344298 | 10254.0368         | 1.040230675    | 0.08184969 | 0.69225416 | 12095.2239             | 1.062920598    | 0.11062494 | 0.73528713 |                     |
| COL3A1             | 392.521296 | 0.633436878    | 0.0630143  | 0.41395902 | 739.85146          | 0.541377924    | 0.22738874 | 0.84271262 | 860.298456             | 0.433934687    | 0.42279269 | 0.95203628 |                     |
| SLC11A1            | 207.858993 | 0.618646275    | 1.89E-07   | 0.00014484 | 385.571488         | 0.550571237    | 0.00041056 | 0.14987715 | 466.18652              | 0.56304112     | 0.00336529 | 0.23712057 | Yes                 |
| FOS                | 352.469296 | 0.606341877    | 0.05283546 | 0.4033241  | 643.747795         | 0.869332204    | 0.05856023 | 0.60978778 | 714.941229             | 0.965660035    | 0.06011965 | 0.7039651  |                     |
| SOD2               | 296.546792 | 0.598764496    | 0.01659691 | 0.26344298 | 564.82725          | 0.538386908    | 0.11886782 | 0.76044926 | 676.89997              | 0.477775366    | 0.20524677 | 0.79313927 |                     |
| NEAT1              | 866.390363 | 0.572790109    | 0.122019   | 0.48996338 | 1726.88505         | 1.120800306    | 0.01984024 | 0.40684052 | 2078.89566             | 1.00077444     | 0.06888355 | 0.71379068 |                     |
| MT2A               | 429.428365 | 0.571389758    | 0.00954193 | 0.19083854 | 1775.58372         | 0.495068787    | 0.09284265 | 0.70715244 | 2111.81567             | 0.565782914    | 0.11290352 | 0.74055794 |                     |
| SQSTM1             | 474.161774 | 0.512804338    | 0.00661297 | 0.16894968 | 930.493327         | 0.848882786    | 0.00154193 | 0.15418283 | 1115.58897             | 0.813626862    | 0.0138623  | 0.47588006 |                     |
| MMP9               | 255.898007 | 0.511030856    | 0.00172926 | 0.06404677 | 487.427814         | 0.380037984    | 0.06231327 | 0.61346199 | 583.529078             | 0.625210316    | 0.06352648 | 0.7039651  |                     |
| ATF3               | 246.586056 | 0.505668525    | 0.00875501 | 0.18140874 | 459.530162         | 0.74200607     | 0.00798477 | 0.28460002 | 544.420923             | 0.785730082    | 0.01587284 | 0.48605613 |                     |
| DUSP1              | 372.731731 | 0.486584761    | 0.00782812 | 0.18140874 | 718.460406         | 0.675381703    | 0.00409368 | 0.20427463 | 798.90527              | 0.704769139    | 0.00981204 | 0.40743756 |                     |
| EZR                | 464.523069 | 0.436439785    | 0.13530634 | 0.50487349 | 906.187312         | 0.834827562    | 0.01687739 | 0.374303   | 1086.54509             | 0.747947535    | 0.27461127 | 0.71379068 |                     |
| KRT16              | 609.755295 | 0.425423051    | 0.00567241 | 0.04890006 | 975.556748         | 0.445061083    | 0.14559645 | 0.78606569 | 1220.06216             | 0.482064554    | 0.04202087 | 0.80631399 |                     |
| CDKN1A             | 378.607985 | 0.411588752    | 0.04890184 | 0.39601595 | 709.030108         | 0.777604211    | 0.00430737 | 0.20470263 | 865.725998             | 0.677779355    | 0.03367684 | 0.58904936 |                     |
| CLT18              | 181.931178 | 0.399172736    | 0.00996405 | 0.04191509 | 533.952038         | 0.355215006    | 0.02214067 | 0.40684052 | 402.185354             | 0.365597111    | 0.05636691 | 0.70420436 |                     |
| CRIP1              | 579.174589 | 0.377509857    | 0.06923619 | 0.41774829 | 1180.98787         | 0.665194598    | 0.04315395 | 0.59320033 | 1378.27245             | 0.741358386    | 0.06495967 | 0.7039651  |                     |
| OAS1               | 262.689164 | 0.372964912    | 0.07135545 | 0.41825823 | 483.452543         | 0.348386908    | 0.00948109 | 0.29072685 | 588.271886             | 0.683797817    | 0.04216207 | 0.63067923 |                     |
| COL21A1            | 283.216261 | 0.34774063     | 0.11548864 | 0.48534692 | 543.974464         | 0.124593639    | 0.67556408 | 0.97295876 | 619.389899             | 0.311076366    | 0.18767891 | 0.79313927 |                     |
| TCL1A              | 161.962139 | 0.324429339    | 0.00954193 | 0.06404677 | 297.745527         | 0.286217762    | 0.00128782 | 0.15418283 | 358.914476             | 0.313275735    | 0.00666112 | 0.13182804 | Yes                 |
| FKBP5              | 156.655959 | 0.31956377     | 0.01196562 | 0.20630378 | 288.313877         | 0.24083704     | 0.16907511 | 0.80350933 | 338.101572             | 0.251524611    | 0.15106222 | 0.80164351 |                     |
| CXCL13             | 261.757772 | 0.304432077    | 0.02551588 | 0.31291833 | 486.537263         | 0.20202022     | 0.25028663 | 0.81386279 | 586.178145             | 0.249310993    | 0.15162784 | 0.72780279 |                     |
| MYL12A             | 504.843393 | 0.303773039    | 0.22682194 | 0.61367037 | 973.525404         | 0.720716688    | 0.03159557 | 0.47063252 | 1160.67198             | 0.666088033    | 0.09287529 | 0.7263558  |                     |
| OASL               | 258.014594 | 0.298766106    | 0.00549993 | 0.1541648  | 494.548174         | 0.465788851    | 0.00318848 | 0.20217367 | 577.31661              | 0.465282666    | 0.10912591 | 0.73528713 |                     |
| ZFP36              | 466.041918 | 0.29221624     | 0.13335282 | 0.50487349 | 631.650665         | 0.475025375    | 0.05956942 | 0.60978778 | 988.611548             | 0.487847463    | 0.0991188  | 0.7263558  |                     |
| RSP03              | 65.2896263 | 0.290966063    | 0.04109392 | 0.35695204 | 122.094016         | 0.257943678    | 0.11869048 | 0.76044926 | 143.914325             | 0.308995191    | 0.1092591  | 0.73528713 |                     |
| <b>COL21A1</b>     | 96.5411045 | 0.290774928    | 0.0083991  | 0.03999577 | 178.274748         | 0.319721811    | 0.00147965 | 0.15418283 | 213.722185             | 0.33860771     | 0.0022411  | 0.22083429 | Yes                 |
| ARHGDI1B           | 205.966227 | 0.287861641    | 0.04096562 | 0.35695204 | 486.444048         | 0.257510969    | 0.10132545 | 0.70715244 | 545.340504             | 0.218177936    | 0.06495059 | 0.78052343 |                     |
| COL1A1             | 623.954591 | 0.284562889    | 0.33760458 | 0.71526394 | 1151.76314         | 0.251325271    | 0.49427984 | 0.95529411 | 1379.01178             | 0.06702276     | 0.88072016 | 0.97848848 |                     |
| IL4R               | 220.007153 | 0.280776618    | 0.01092497 | 0.20231429 | 416.543543         | 0.348377681    | 0.01407256 | 0.32991373 | 495.252051             | 0.385286083    | 0.01478337 | 0.40743756 |                     |
| <b>SP1</b>         | 793.95024  | 0.274902042    | 0.00265226 | 0.08037161 | 352.005521         | 0.319550212    | 0.0209091  | 0.17382665 | 424.562732             | 0.317695632    | 0.00524    | 0.26211389 | Yes                 |
| <b>ITGA5</b>       | 182.035166 | 0.273837899    | 0.00211066 | 0.07278133 | 480.852052         | 0.226084173    | 0.04506812 | 0.56934157 | 402.260677             | 0.30336889     | 0.05216175 | 0.5176175  | Yes                 |
| IER3               | 401.465412 | 0.267372809    | 0.08111706 | 0.43161934 | 733.389792         | 0.512339802    | 0.01421472 | 0.32991373 | 878.336888             | 0.438805495    | 0.08685337 | 0.72408868 |                     |
| KLF2               | 409.778611 | 0.259101857    | 0.03253334 | 0.3388889  | 753.184873         | 0.297896803    | 0.02445935 | 0.40684052 | 892.492339             | 0.283721192    | 0.09471993 | 0.65261317 |                     |
| CD163              | 117.519516 | 0.25739282     | 0.03652784 | 0.35695204 | 215.741815         | 0.235189381    | 0.10572635 | 0.72768895 | 256.577475             | 0.22120639     | 0.20230369 | 0.79313927 |                     |
| CD52               | 178.342569 | 0.249309495    | 0.03080577 | 0.33484528 | 329.444325         | 0.17281424     | 0.22098906 | 0.84271262 | 388.811356             | 0.171231949    | 0.15035973 | 0.72780279 |                     |
| VEGFC              | 116.304572 | 0.241700243    | 0.04845146 | 0.39601595 | 219.034269         | 0.196831987    | 0.19780647 | 0.81386279 | 263.045931             | 0.24462294     | 0.15182682 | 0.77280279 |                     |
| MARCO              | 125.215062 | 0.23998011     | 0.00838667 | 0.18140874 | 231.83625          | 0.23269458     | 0.0238297  | 0.40684052 | 281.024054             | 0.262657259    | 0.02920153 | 0.55278634 |                     |
| COL3L1/L13         | 418.635472 | 0.23974684     | 0.03389583 | 0.34587584 | 767.44468          | 0.262720995    | 0.08733366 | 0.69678309 | 930.295985             | 0.232282368    | 0.20422157 | 0.79313927 |                     |
| CD22               | 92.3973621 | 0.23741245     | 0.07935439 | 0.43161934 | 171.530826         | 0.177683837    | 0.24582977 | 0.85483662 | 206.285795             | 0.10105006     | 0.25886286 | 0.82719957 |                     |
| CHI3L1             | 218.435892 | 0.236505611    | 0.17854785 | 0.56041039 | 403.411575         | 0.230393136    | 0.33684141 | 0.92608189 | 491.699117             | 0.171029084    | 0.54958045 | 0.96029886 |                     |
| HGF                | 128.808174 | 0.236183406    | 0.00028303 | 0.01818949 | 208.963156         | 0.27246483     | 0.00108059 | 0.15418283 | 287.728884             | 0.252449156    | 0.02004411 | 0.22083429 | Yes                 |
| <b>GZMK</b>        | 177.279418 | 0.233999116    | 0.0092078  | 0.0418538  | 330.256396         | 0.246065621    | 0.00334158 | 0.20217367 | 397.674623             | 0.260074683    | 0.00454881 | 0.25193257 | Yes                 |
| <b>GZMH</b>        | 181.54976  | 0.233366814    | 0.00033614 | 0.01977282 | 332.248125         | 0.215417286    | 0.00353193 | 0.23074301 | 398.359545             | 0.237092767    | 0.00374203 | 0.23712057 | Yes                 |
| CSTB               | 349.213445 | 0.231526772    | 0.28665551 | 0.6758503  | 695.910767         | 0.618706889    | 0.04965394 | 0.5944744  | 812.204594             | 0.635499632    | 0.09632235 | 0.7263558  |                     |
| KRT8               | 300.938825 | 0.230305325    | 0.89672815 | 0.89607096 | 643.03228          | 0.68782652     | 0.16679337 | 0.80350933 | 7524.25128             | 0.606972503    | 0.30805751 | 0.87572381 |                     |
| COL6A3             | 260.388401 | 0.228403251    | 0.17222085 | 0.55376478 | 480.886454         | 0.1757595      | 0.33575148 | 0.9256353  | 565.933646             | 0.133127424    | 0.53617699 | 0.95668154 |                     |
| IGHG1              | 116.186139 | 0.227212704    | 0.72987109 | 0.94788453 | 2155.21279         | 0.226515772    | 0.81470406 | 0.98267871 | 28446.8984             | -0.22446389    | 0.53419359 | 0.97848848 |                     |
| MXR4               | 212.30091  | 0.225002807    | 0.03911167 | 0.35695204 | 367.684989         | 0.186952907    | 0.16030126 | 0.80350933 | 470.149445             | 0.158137544    | 0.30897581 | 0.87763215 |                     |
| MS4A1              | 141.663715 | 0.224287822    | 0.11323991 |            |                    |                |            |            |                        |                |            |            |                     |
